# Supplementary material for: Where Is the Action in Perception? An Exploratory Study With a Haptic Sensory Substitution Device
Source: Front Psychol. 2020 Apr 28;11:809. doi: 10.3389/fpsyg.2020.00809 (PMC7198821; doi:10.3389/fpsyg.2020.00809)
Supplement: DATA SHEET S1 — Task performance – participants’ responses for all trials analyzed in this article. [file Data_Sheet_1.csv]

Trial	Pair	Block	Real configuration	Response (passive group)	Success (passive group)	Confidence (passive group)	Response (active group)	Success (active group)	Confidence (active group)
1	1	First	Right-hand side	Left-hand side	FALSE	NA	Right-hand side	TRUE	Uncertain
2	1	First	Left-hand side	Left-hand side	TRUE	Certain	Right-hand side	FALSE	Certain
3	1	First	Right-hand side	Right-hand side	TRUE	Uncertain	Right-hand side	TRUE	Certain
4	1	First	Left-hand side	Right-hand side	FALSE	Certain	Right-hand side	FALSE	Certain
5	1	First	Left-hand side	Left-hand side	TRUE	Certain	Left-hand side	TRUE	Certain
6	1	First	Right-hand side	Right-hand side	TRUE	Certain	Right-hand side	TRUE	Certain
7	1	First	Left-hand side	Left-hand side	TRUE	Certain	Left-hand side	TRUE	Uncertain
8	1	First	Right-hand side	Right-hand side	TRUE	Certain	Right-hand side	TRUE	Certain
9	1	First	Left-hand side	Left-hand side	TRUE	Certain	Left-hand side	TRUE	Certain
10	1	First	Left-hand side	Left-hand side	TRUE	Uncertain	Left-hand side	TRUE	Certain
11	1	First	Right-hand side	Right-hand side	TRUE	Uncertain	Right-hand side	TRUE	Uncertain
12	1	First	Right-hand side	Right-hand side	TRUE	Certain	Right-hand side	TRUE	Uncertain
13	1	First	Right-hand side	Right-hand side	TRUE	Certain	Right-hand side	TRUE	Certain
14	1	First	Left-hand side	Right-hand side	FALSE	Certain	Right-hand side	FALSE	Uncertain
15	1	First	Left-hand side	Right-hand side	FALSE	Certain	Right-hand side	FALSE	Uncertain
16	1	First	Right-hand side	Right-hand side	TRUE	Certain	Right-hand side	TRUE	Certain
17	1	First	Right-hand side	Right-hand side	TRUE	Certain	Right-hand side	TRUE	Certain
18	1	First	Left-hand side	Left-hand side	TRUE	Uncertain	Left-hand side	TRUE	Certain
19	1	First	Right-hand side	Left-hand side	FALSE	Uncertain	Right-hand side	TRUE	Certain
20	1	First	Left-hand side	Left-hand side	TRUE	Certain	Right-hand side	FALSE	Uncertain
21	1	First	Left-hand side	Left-hand side	TRUE	Certain	Right-hand side	FALSE	Uncertain
22	1	First	Left-hand side	Right-hand side	FALSE	Certain	Right-hand side	FALSE	Uncertain
23	1	First	Right-hand side	Right-hand side	TRUE	Uncertain	Right-hand side	TRUE	Certain
24	1	First	Left-hand side	Right-hand side	FALSE	Certain	Right-hand side	FALSE	Certain
25	1	First	Left-hand side	Right-hand side	FALSE	Certain	Right-hand side	FALSE	Uncertain
26	1	First	Right-hand side	Right-hand side	TRUE	Certain	Right-hand side	TRUE	Certain
27	1	First	Right-hand side	Right-hand side	TRUE	Certain	Right-hand side	TRUE	Certain
28	1	First	Left-hand side	Left-hand side	TRUE	Certain	Left-hand side	TRUE	Certain
29	1	First	Left-hand side	Right-hand side	FALSE	Certain	Left-hand side	TRUE	Uncertain
30	1	First	Left-hand side	Right-hand side	FALSE	Certain	Left-hand side	TRUE	Certain
31	1	First	Left-hand side	Right-hand side	FALSE	Certain	Left-hand side	TRUE	Uncertain
32	1	First	Left-hand side	Left-hand side	TRUE	Uncertain	Right-hand side	FALSE	Certain
33	1	First	Left-hand side	Left-hand side	TRUE	Certain	Left-hand side	TRUE	Certain
34	1	First	Right-hand side	Right-hand side	TRUE	Certain	Right-hand side	TRUE	Certain
35	1	First	Left-hand side	Right-hand side	FALSE	Certain	Left-hand side	TRUE	Uncertain
36	1	First	Right-hand side	Right-hand side	TRUE	Certain	Right-hand side	TRUE	Certain
37	1	First	Right-hand side	Right-hand side	TRUE	Certain	Right-hand side	TRUE	Certain
38	1	First	Left-hand side	Left-hand side	TRUE	Certain	Left-hand side	TRUE	Certain
39	1	First	Right-hand side	Left-hand side	FALSE	Certain	Right-hand side	TRUE	Certain
40	1	First	Right-hand side	Right-hand side	TRUE	Certain	Right-hand side	TRUE	Certain
41	1	First	Right-hand side	Right-hand side	TRUE	Certain	Right-hand side	TRUE	Certain
42	1	First	Left-hand side	Right-hand side	FALSE	Uncertain	Left-hand side	TRUE	Certain
43	1	First	Left-hand side	Right-hand side	FALSE	Uncertain	Left-hand side	TRUE	Uncertain
44	1	First	Right-hand side	Right-hand side	TRUE	Certain	Right-hand side	TRUE	Uncertain
45	1	First	Left-hand side	Right-hand side	FALSE	Certain	Left-hand side	TRUE	Certain
46	1	First	Right-hand side	Left-hand side	FALSE	Certain	Right-hand side	TRUE	Certain
47	1	First	Right-hand side	Right-hand side	TRUE	Certain	Right-hand side	TRUE	Certain
48	1	First	Left-hand side	Right-hand side	FALSE	Certain	Left-hand side	TRUE	Uncertain
49	1	First	Right-hand side	Right-hand side	TRUE	Certain	Right-hand side	TRUE	Uncertain
50	1	First	Right-hand side	Right-hand side	TRUE	Certain	Right-hand side	TRUE	Certain
51	1	First	Left-hand side	Left-hand side	TRUE	Certain	Left-hand side	TRUE	Uncertain
52	1	First	Right-hand side	Right-hand side	TRUE	Certain	Right-hand side	TRUE	Certain
53	1	First	Left-hand side	Right-hand side	FALSE	Certain	Right-hand side	FALSE	Uncertain
54	1	First	Right-hand side	Right-hand side	TRUE	Certain	Right-hand side	TRUE	Certain
55	1	First	Left-hand side	Right-hand side	FALSE	Certain	Right-hand side	FALSE	Uncertain
56	1	First	Right-hand side	Right-hand side	TRUE	Certain	Right-hand side	TRUE	Certain
57	1	First	Left-hand side	Right-hand side	FALSE	Certain	Right-hand side	FALSE	Certain
58	1	First	Left-hand side	Right-hand side	FALSE	Uncertain	Left-hand side	TRUE	Certain
59	1	First	Left-hand side	Left-hand side	TRUE	Uncertain	Right-hand side	FALSE	Uncertain
60	1	First	Left-hand side	Right-hand side	FALSE	Uncertain	Right-hand side	FALSE	Uncertain
1	2	First	Right-hand side	Right-hand side	TRUE	Uncertain	Left-hand side	FALSE	Certain
2	2	First	Right-hand side	Left-hand side	FALSE	Uncertain	Left-hand side	FALSE	Uncertain
3	2	First	Left-hand side	Left-hand side	TRUE	Uncertain	Left-hand side	TRUE	Uncertain
4	2	First	Left-hand side	Left-hand side	TRUE	Certain	Right-hand side	FALSE	Uncertain
5	2	First	Right-hand side	Left-hand side	FALSE	Certain	Right-hand side	TRUE	Certain
6	2	First	Left-hand side	Left-hand side	TRUE	Certain	Left-hand side	TRUE	Certain
7	2	First	Right-hand side	Left-hand side	FALSE	Certain	Right-hand side	TRUE	Certain
8	2	First	Left-hand side	Right-hand side	FALSE	Certain	Left-hand side	TRUE	Certain
9	2	First	Left-hand side	Left-hand side	TRUE	Certain	Left-hand side	TRUE	Uncertain
10	2	First	Right-hand side	Right-hand side	TRUE	Certain	Left-hand side	FALSE	Certain
11	2	First	Left-hand side	Left-hand side	TRUE	Certain	Right-hand side	FALSE	Uncertain
12	2	First	Left-hand side	Right-hand side	FALSE	Uncertain	Left-hand side	TRUE	Certain
13	2	First	Right-hand side	Left-hand side	FALSE	Certain	Left-hand side	FALSE	Uncertain
14	2	First	Right-hand side	Right-hand side	TRUE	Uncertain	Right-hand side	TRUE	Uncertain
15	2	First	Right-hand side	Right-hand side	TRUE	Certain	Right-hand side	TRUE	Uncertain
16	2	First	Right-hand side	Right-hand side	TRUE	Uncertain	Right-hand side	TRUE	Uncertain
17	2	First	Left-hand side	Right-hand side	FALSE	Certain	Left-hand side	TRUE	Certain
18	2	First	Left-hand side	Left-hand side	TRUE	Uncertain	Left-hand side	TRUE	Certain
19	2	First	Right-hand side	Right-hand side	TRUE	Uncertain	Left-hand side	FALSE	Certain
20	2	First	Left-hand side	Left-hand side	TRUE	Certain	Right-hand side	FALSE	Certain
21	2	First	Right-hand side	Left-hand side	FALSE	Certain	Left-hand side	FALSE	Uncertain
22	2	First	Right-hand side	Right-hand side	TRUE	Certain	Right-hand side	TRUE	Certain
23	2	First	Left-hand side	Left-hand side	TRUE	Uncertain	Left-hand side	TRUE	Certain
24	2	First	Right-hand side	Right-hand side	TRUE	Certain	Right-hand side	TRUE	Certain
25	2	First	Left-hand side	Left-hand side	TRUE	Certain	Left-hand side	TRUE	Certain
26	2	First	Right-hand side	Right-hand side	TRUE	Uncertain	Right-hand side	TRUE	Certain
27	2	First	Left-hand side	Left-hand side	TRUE	Certain	Left-hand side	TRUE	Uncertain
28	2	First	Right-hand side	Right-hand side	TRUE	Certain	Right-hand side	TRUE	Certain
29	2	First	Left-hand side	Left-hand side	TRUE	Uncertain	Left-hand side	TRUE	Certain
30	2	First	Right-hand side	Right-hand side	TRUE	Certain	Right-hand side	TRUE	Certain
31	2	First	Right-hand side	Left-hand side	FALSE	Uncertain	Right-hand side	TRUE	Certain
32	2	First	Left-hand side	Left-hand side	TRUE	NA	Left-hand side	TRUE	Certain
33	2	First	Left-hand side	Left-hand side	TRUE	Uncertain	Left-hand side	TRUE	Certain
34	2	First	Right-hand side	Left-hand side	FALSE	Uncertain	Right-hand side	TRUE	Certain
35	2	First	Right-hand side	Right-hand side	TRUE	Certain	Right-hand side	TRUE	Certain
36	2	First	Right-hand side	Left-hand side	FALSE	Uncertain	Right-hand side	TRUE	Uncertain
37	2	First	Left-hand side	Right-hand side	FALSE	Certain	Left-hand side	TRUE	Certain
38	2	First	Right-hand side	Right-hand side	TRUE	Uncertain	Right-hand side	TRUE	Certain
39	2	First	Left-hand side	Left-hand side	TRUE	Certain	Left-hand side	TRUE	Uncertain
40	2	First	Left-hand side	Left-hand side	TRUE	Certain	Left-hand side	TRUE	Certain
41	2	First	Left-hand side	Left-hand side	TRUE	Certain	Left-hand side	TRUE	Certain
42	2	First	Left-hand side	Left-hand side	TRUE	Uncertain	Left-hand side	TRUE	Certain
43	2	First	Left-hand side	Left-hand side	TRUE	Certain	Left-hand side	TRUE	Certain
44	2	First	Left-hand side	Left-hand side	TRUE	Certain	Right-hand side	FALSE	Uncertain
45	2	First	Left-hand side	Left-hand side	TRUE	Uncertain	Left-hand side	TRUE	Certain
46	2	First	Right-hand side	Left-hand side	FALSE	Certain	Right-hand side	TRUE	Certain
47	2	First	Right-hand side	Right-hand side	TRUE	Certain	Right-hand side	TRUE	Certain
48	2	First	Right-hand side	Right-hand side	TRUE	Certain	Right-hand side	TRUE	Certain
49	2	First	Right-hand side	Right-hand side	TRUE	Certain	Right-hand side	TRUE	Certain
50	2	First	Left-hand side	Right-hand side	FALSE	Certain	Right-hand side	FALSE	Uncertain
51	2	First	Left-hand side	Right-hand side	FALSE	Uncertain	Right-hand side	FALSE	Uncertain
52	2	First	Right-hand side	Left-hand side	FALSE	Uncertain	Right-hand side	TRUE	Uncertain
53	2	First	Right-hand side	Right-hand side	TRUE	Certain	Right-hand side	TRUE	Certain
54	2	First	Right-hand side	Right-hand side	TRUE	Certain	Right-hand side	TRUE	Certain
55	2	First	Right-hand side	Right-hand side	TRUE	Certain	Right-hand side	TRUE	Certain
56	2	First	Right-hand side	Right-hand side	TRUE	Certain	Right-hand side	TRUE	Uncertain
57	2	First	Right-hand side	Left-hand side	FALSE	Certain	Right-hand side	TRUE	Certain
58	2	First	Right-hand side	Right-hand side	TRUE	Certain	Right-hand side	TRUE	Certain
59	2	First	Left-hand side	Right-hand side	FALSE	Certain	Right-hand side	FALSE	Uncertain
60	2	First	Left-hand side	Right-hand side	FALSE	Uncertain	Left-hand side	TRUE	Uncertain
1	3	First	Right-hand side	Right-hand side	TRUE	Certain	Right-hand side	TRUE	Certain
2	3	First	Right-hand side	Left-hand side	FALSE	Certain	Left-hand side	FALSE	Certain
3	3	First	Left-hand side	Left-hand side	TRUE	Certain	Left-hand side	TRUE	Certain
4	3	First	Left-hand side	Right-hand side	FALSE	Uncertain	Right-hand side	FALSE	Uncertain
5	3	First	Right-hand side	Right-hand side	TRUE	Certain	Right-hand side	TRUE	Certain
6	3	First	Right-hand side	Right-hand side	TRUE	Certain	Right-hand side	TRUE	Certain
7	3	First	Right-hand side	Right-hand side	TRUE	Certain	Right-hand side	TRUE	Certain
8	3	First	Right-hand side	Right-hand side	TRUE	Certain	Right-hand side	TRUE	Certain
9	3	First	Left-hand side	Left-hand side	TRUE	Certain	Left-hand side	TRUE	Certain
10	3	First	Right-hand side	Right-hand side	TRUE	Certain	Right-hand side	TRUE	Certain
11	3	First	Left-hand side	Right-hand side	FALSE	Uncertain	Left-hand side	TRUE	Certain
12	3	First	Left-hand side	Left-hand side	TRUE	Certain	Left-hand side	TRUE	Uncertain
13	3	First	Left-hand side	Left-hand side	TRUE	Uncertain	Left-hand side	TRUE	Uncertain
14	3	First	Right-hand side	Right-hand side	TRUE	Certain	Right-hand side	TRUE	Certain
15	3	First	Right-hand side	Right-hand side	TRUE	Certain	Right-hand side	TRUE	Certain
16	3	First	Right-hand side	Right-hand side	TRUE	Certain	Right-hand side	TRUE	Certain
17	3	First	Right-hand side	Right-hand side	TRUE	Uncertain	Left-hand side	FALSE	Certain
18	3	First	Right-hand side	Right-hand side	TRUE	Certain	Right-hand side	TRUE	Certain
19	3	First	Right-hand side	Right-hand side	TRUE	Certain	Right-hand side	TRUE	Certain
20	3	First	Left-hand side	Right-hand side	FALSE	Uncertain	Left-hand side	TRUE	Uncertain
21	3	First	Left-hand side	Right-hand side	FALSE	Uncertain	Left-hand side	TRUE	Uncertain
22	3	First	Left-hand side	Right-hand side	FALSE	Uncertain	Left-hand side	TRUE	Uncertain
23	3	First	Left-hand side	Left-hand side	TRUE	Uncertain	Right-hand side	FALSE	Certain
24	3	First	Left-hand side	Right-hand side	FALSE	Uncertain	Left-hand side	TRUE	Certain
25	3	First	Left-hand side	Left-hand side	TRUE	Uncertain	Left-hand side	TRUE	Certain
26	3	First	Right-hand side	Right-hand side	TRUE	Certain	Right-hand side	TRUE	Certain
27	3	First	Right-hand side	Right-hand side	TRUE	Certain	Right-hand side	TRUE	Certain
28	3	First	Right-hand side	Right-hand side	TRUE	Certain	Right-hand side	TRUE	Certain
29	3	First	Right-hand side	Right-hand side	TRUE	Certain	Right-hand side	TRUE	Uncertain
30	3	First	Left-hand side	Right-hand side	FALSE	Uncertain	Right-hand side	FALSE	Certain
31	3	First	Left-hand side	Left-hand side	TRUE	Uncertain	Left-hand side	TRUE	Certain
32	3	First	Right-hand side	Right-hand side	TRUE	Certain	Right-hand side	TRUE	Uncertain
33	3	First	Right-hand side	Right-hand side	TRUE	Certain	Right-hand side	TRUE	Certain
34	3	First	Right-hand side	Right-hand side	TRUE	Certain	Right-hand side	TRUE	Certain
35	3	First	Left-hand side	Left-hand side	TRUE	Uncertain	Left-hand side	TRUE	Uncertain
36	3	First	Left-hand side	Left-hand side	TRUE	Uncertain	Left-hand side	TRUE	Certain
37	3	First	Left-hand side	Left-hand side	TRUE	Uncertain	Left-hand side	TRUE	Uncertain
38	3	First	Left-hand side	Left-hand side	TRUE	Uncertain	Left-hand side	TRUE	Uncertain
39	3	First	Right-hand side	Right-hand side	TRUE	Certain	Right-hand side	TRUE	Certain
40	3	First	Left-hand side	Left-hand side	TRUE	Uncertain	Left-hand side	TRUE	Uncertain
41	3	First	Left-hand side	Left-hand side	TRUE	Certain	Left-hand side	TRUE	Certain
42	3	First	Right-hand side	Right-hand side	TRUE	Uncertain	Right-hand side	TRUE	Certain
43	3	First	Right-hand side	Right-hand side	TRUE	Certain	Right-hand side	TRUE	Uncertain
44	3	First	Left-hand side	Left-hand side	TRUE	Uncertain	Right-hand side	FALSE	Uncertain
45	3	First	Left-hand side	Left-hand side	TRUE	Certain	Left-hand side	TRUE	Certain
46	3	First	Left-hand side	Right-hand side	FALSE	Uncertain	Right-hand side	FALSE	Certain
47	3	First	Left-hand side	Left-hand side	TRUE	Certain	Left-hand side	TRUE	Uncertain
48	3	First	Right-hand side	Right-hand side	TRUE	Certain	Right-hand side	TRUE	Certain
49	3	First	Left-hand side	Left-hand side	TRUE	Uncertain	Left-hand side	TRUE	Certain
50	3	First	Left-hand side	Right-hand side	FALSE	Uncertain	Right-hand side	FALSE	Certain
51	3	First	Left-hand side	Left-hand side	TRUE	Uncertain	Right-hand side	FALSE	Uncertain
52	3	First	Right-hand side	Right-hand side	TRUE	Certain	Left-hand side	FALSE	Uncertain
53	3	First	Right-hand side	Right-hand side	TRUE	Certain	Right-hand side	TRUE	Certain
54	3	First	Left-hand side	Left-hand side	TRUE	Uncertain	Left-hand side	TRUE	Uncertain
55	3	First	Right-hand side	Right-hand side	TRUE	Certain	Right-hand side	TRUE	Certain
56	3	First	Right-hand side	Right-hand side	TRUE	Uncertain	Right-hand side	TRUE	Certain
57	3	First	Right-hand side	Right-hand side	TRUE	Certain	Right-hand side	TRUE	Certain
58	3	First	Right-hand side	Right-hand side	TRUE	Certain	Right-hand side	TRUE	Certain
59	3	First	Right-hand side	Right-hand side	TRUE	Certain	Right-hand side	TRUE	Certain
60	3	First	Left-hand side	Left-hand side	TRUE	Uncertain	Left-hand side	TRUE	Certain
1	4	First	Right-hand side	Right-hand side	TRUE	Uncertain	Left-hand side	FALSE	Uncertain
2	4	First	Right-hand side	Left-hand side	FALSE	Certain	Left-hand side	FALSE	Certain
3	4	First	Left-hand side	Left-hand side	TRUE	Certain	Right-hand side	FALSE	Certain
4	4	First	Left-hand side	Left-hand side	TRUE	Certain	Left-hand side	TRUE	Certain
5	4	First	Right-hand side	Left-hand side	FALSE	Certain	Right-hand side	TRUE	Certain
6	4	First	Left-hand side	Right-hand side	FALSE	Certain	Right-hand side	FALSE	Uncertain
7	4	First	Right-hand side	Right-hand side	TRUE	Certain	Right-hand side	TRUE	Certain
8	4	First	Left-hand side	Left-hand side	TRUE	Uncertain	Left-hand side	TRUE	Certain
9	4	First	Left-hand side	Left-hand side	TRUE	Uncertain	Right-hand side	FALSE	Uncertain
10	4	First	Right-hand side	Right-hand side	TRUE	Certain	Right-hand side	TRUE	Certain
11	4	First	Left-hand side	Left-hand side	TRUE	Uncertain	Left-hand side	TRUE	Uncertain
12	4	First	Left-hand side	Left-hand side	TRUE	Certain	Left-hand side	TRUE	Uncertain
13	4	First	Left-hand side	Left-hand side	TRUE	Uncertain	Left-hand side	TRUE	Uncertain
14	4	First	Right-hand side	Right-hand side	TRUE	Certain	Right-hand side	TRUE	Certain
15	4	First	Right-hand side	Left-hand side	FALSE	Certain	Right-hand side	TRUE	Uncertain
16	4	First	Right-hand side	Right-hand side	TRUE	Uncertain	Right-hand side	TRUE	Certain
17	4	First	Left-hand side	Left-hand side	TRUE	Uncertain	Left-hand side	TRUE	Certain
18	4	First	Left-hand side	Left-hand side	TRUE	Certain	Left-hand side	TRUE	Certain
19	4	First	Right-hand side	Left-hand side	FALSE	Uncertain	Right-hand side	TRUE	Certain
20	4	First	Left-hand side	Left-hand side	TRUE	Certain	Left-hand side	TRUE	Uncertain
21	4	First	Right-hand side	Right-hand side	TRUE	Uncertain	Right-hand side	TRUE	Certain
22	4	First	Left-hand side	Right-hand side	FALSE	Uncertain	Left-hand side	TRUE	Uncertain
23	4	First	Left-hand side	Left-hand side	TRUE	Uncertain	Right-hand side	FALSE	Uncertain
24	4	First	Right-hand side	Right-hand side	TRUE	Certain	Right-hand side	TRUE	Uncertain
25	4	First	Right-hand side	Left-hand side	FALSE	Certain	Right-hand side	TRUE	Certain
26	4	First	Right-hand side	Right-hand side	TRUE	Certain	Right-hand side	TRUE	Uncertain
27	4	First	Right-hand side	Right-hand side	TRUE	Certain	Right-hand side	TRUE	Certain
28	4	First	Right-hand side	Right-hand side	TRUE	Certain	Right-hand side	TRUE	Uncertain
29	4	First	Right-hand side	Right-hand side	TRUE	Uncertain	Right-hand side	TRUE	Certain
30	4	First	Left-hand side	Left-hand side	TRUE	Uncertain	Right-hand side	FALSE	Uncertain
31	4	First	Right-hand side	Left-hand side	FALSE	NA	Right-hand side	TRUE	Uncertain
32	4	First	Right-hand side	Right-hand side	TRUE	Uncertain	Right-hand side	TRUE	Certain
33	4	First	Right-hand side	Right-hand side	TRUE	Uncertain	Right-hand side	TRUE	Certain
34	4	First	Left-hand side	Right-hand side	FALSE	Uncertain	Left-hand side	TRUE	Certain
35	4	First	Left-hand side	Right-hand side	FALSE	Uncertain	Left-hand side	TRUE	Certain
36	4	First	Left-hand side	Left-hand side	TRUE	Certain	Left-hand side	TRUE	Uncertain
37	4	First	Right-hand side	Right-hand side	TRUE	Certain	Right-hand side	TRUE	Certain
38	4	First	Left-hand side	Left-hand side	TRUE	Uncertain	Left-hand side	TRUE	Certain
39	4	First	Left-hand side	Left-hand side	TRUE	Certain	Left-hand side	TRUE	Certain
40	4	First	Right-hand side	Left-hand side	FALSE	Certain	Right-hand side	TRUE	Certain
41	4	First	Left-hand side	Left-hand side	TRUE	Certain	Left-hand side	TRUE	Certain
42	4	First	Right-hand side	Right-hand side	TRUE	Uncertain	Right-hand side	TRUE	Certain
43	4	First	Left-hand side	Left-hand side	TRUE	Certain	Left-hand side	TRUE	Certain
44	4	First	Left-hand side	Left-hand side	TRUE	Certain	Right-hand side	FALSE	Uncertain
45	4	First	Right-hand side	Left-hand side	FALSE	Uncertain	Right-hand side	TRUE	Certain
46	4	First	Right-hand side	Right-hand side	TRUE	Certain	Right-hand side	TRUE	Certain
47	4	First	Left-hand side	Left-hand side	TRUE	Uncertain	Left-hand side	TRUE	Uncertain
48	4	First	Left-hand side	Right-hand side	FALSE	Uncertain	Left-hand side	TRUE	Certain
49	4	First	Left-hand side	Right-hand side	FALSE	Uncertain	Left-hand side	TRUE	Certain
50	4	First	Right-hand side	Right-hand side	TRUE	Uncertain	Right-hand side	TRUE	Certain
51	4	First	Left-hand side	Left-hand side	TRUE	Uncertain	Left-hand side	TRUE	Uncertain
52	4	First	Right-hand side	Right-hand side	TRUE	Uncertain	Right-hand side	TRUE	Uncertain
53	4	First	Left-hand side	Right-hand side	FALSE	Certain	Left-hand side	TRUE	Uncertain
54	4	First	Right-hand side	Left-hand side	FALSE	Certain	Left-hand side	FALSE	Certain
55	4	First	Right-hand side	Right-hand side	TRUE	Certain	Right-hand side	TRUE	Certain
56	4	First	Left-hand side	Left-hand side	TRUE	Certain	Left-hand side	TRUE	Certain
57	4	First	Left-hand side	Left-hand side	TRUE	Certain	Left-hand side	TRUE	Certain
58	4	First	Right-hand side	Left-hand side	FALSE	Uncertain	Right-hand side	TRUE	Certain
59	4	First	Left-hand side	Left-hand side	TRUE	Uncertain	Left-hand side	TRUE	NA
60	4	First	Right-hand side	Left-hand side	FALSE	NA	Right-hand side	TRUE	NA
1	5	First	Right-hand side	Right-hand side	TRUE	Certain	Left-hand side	FALSE	Certain
2	5	First	Right-hand side	Left-hand side	FALSE	Certain	Right-hand side	TRUE	Uncertain
3	5	First	Right-hand side	Left-hand side	FALSE	Certain	Right-hand side	TRUE	Certain
4	5	First	Left-hand side	Left-hand side	TRUE	Uncertain	Left-hand side	TRUE	Certain
5	5	First	Right-hand side	Left-hand side	FALSE	Certain	Left-hand side	FALSE	Certain
6	5	First	Left-hand side	Left-hand side	TRUE	Certain	Left-hand side	TRUE	Certain
7	5	First	Right-hand side	Left-hand side	FALSE	Certain	Left-hand side	FALSE	Certain
8	5	First	Right-hand side	Left-hand side	FALSE	Certain	Right-hand side	TRUE	NA
9	5	First	Left-hand side	Right-hand side	FALSE	Certain	Left-hand side	TRUE	NA
10	5	First	Right-hand side	Left-hand side	FALSE	Certain	Left-hand side	FALSE	Certain
11	5	First	Left-hand side	Left-hand side	TRUE	Certain	Right-hand side	FALSE	Certain
12	5	First	Left-hand side	Left-hand side	TRUE	Certain	Right-hand side	FALSE	Certain
13	5	First	Left-hand side	Left-hand side	TRUE	Certain	Right-hand side	FALSE	Certain
14	5	First	Left-hand side	Left-hand side	TRUE	Certain	Right-hand side	FALSE	Uncertain
15	5	First	Left-hand side	Left-hand side	TRUE	Certain	Right-hand side	FALSE	Certain
16	5	First	Left-hand side	Right-hand side	FALSE	Certain	Right-hand side	FALSE	Uncertain
17	5	First	Left-hand side	Left-hand side	TRUE	Certain	Right-hand side	FALSE	Uncertain
18	5	First	Right-hand side	Left-hand side	FALSE	Certain	Left-hand side	FALSE	Uncertain
19	5	First	Right-hand side	Left-hand side	FALSE	Certain	Right-hand side	TRUE	Certain
20	5	First	Right-hand side	Right-hand side	TRUE	Certain	Left-hand side	FALSE	Certain
21	5	First	Right-hand side	Left-hand side	FALSE	Certain	Left-hand side	FALSE	Uncertain
22	5	First	Right-hand side	Left-hand side	FALSE	Certain	Right-hand side	TRUE	Certain
23	5	First	Right-hand side	Left-hand side	FALSE	Certain	Left-hand side	FALSE	Uncertain
24	5	First	Left-hand side	Right-hand side	FALSE	Certain	Left-hand side	TRUE	Uncertain
25	5	First	Left-hand side	Left-hand side	TRUE	Certain	Left-hand side	TRUE	Certain
26	5	First	Right-hand side	Right-hand side	TRUE	Certain	Right-hand side	TRUE	Uncertain
27	5	First	Left-hand side	Left-hand side	TRUE	Certain	Left-hand side	TRUE	Uncertain
28	5	First	Left-hand side	Left-hand side	TRUE	Certain	Right-hand side	FALSE	Certain
29	5	First	Left-hand side	Left-hand side	TRUE	Certain	Left-hand side	TRUE	Certain
30	5	First	Right-hand side	Right-hand side	TRUE	Certain	Right-hand side	TRUE	Certain
31	5	First	Left-hand side	Left-hand side	TRUE	Certain	Right-hand side	FALSE	Certain
32	5	First	Left-hand side	Right-hand side	FALSE	Certain	Left-hand side	TRUE	Uncertain
33	5	First	Left-hand side	Left-hand side	TRUE	Certain	Right-hand side	FALSE	Certain
34	5	First	Right-hand side	Right-hand side	TRUE	Certain	Right-hand side	TRUE	Certain
35	5	First	Left-hand side	Left-hand side	TRUE	Certain	Left-hand side	TRUE	Uncertain
36	5	First	Right-hand side	Left-hand side	FALSE	Certain	Left-hand side	FALSE	Certain
37	5	First	Left-hand side	Left-hand side	TRUE	Certain	Right-hand side	FALSE	Certain
38	5	First	Right-hand side	Right-hand side	TRUE	Certain	Left-hand side	FALSE	Certain
39	5	First	Right-hand side	Right-hand side	TRUE	Uncertain	Right-hand side	TRUE	Uncertain
40	5	First	Right-hand side	Left-hand side	FALSE	Certain	Right-hand side	TRUE	Uncertain
41	5	First	Left-hand side	Left-hand side	TRUE	Certain	Left-hand side	TRUE	Certain
42	5	First	Right-hand side	Right-hand side	TRUE	Certain	Left-hand side	FALSE	Certain
43	5	First	Left-hand side	Left-hand side	TRUE	Certain	Right-hand side	FALSE	Uncertain
44	5	First	Left-hand side	Left-hand side	TRUE	Certain	Left-hand side	TRUE	Certain
45	5	First	Right-hand side	Right-hand side	TRUE	Certain	Left-hand side	FALSE	Certain
46	5	First	Left-hand side	Left-hand side	TRUE	Certain	Left-hand side	TRUE	Uncertain
47	5	First	Right-hand side	Right-hand side	TRUE	Uncertain	Left-hand side	FALSE	Certain
48	5	First	Right-hand side	Left-hand side	FALSE	Certain	Right-hand side	TRUE	Certain
49	5	First	Right-hand side	Right-hand side	TRUE	Uncertain	Left-hand side	FALSE	Certain
50	5	First	Right-hand side	Right-hand side	TRUE	Certain	Left-hand side	FALSE	Uncertain
51	5	First	Left-hand side	Right-hand side	FALSE	Certain	Left-hand side	TRUE	Certain
52	5	First	Left-hand side	Right-hand side	FALSE	Certain	Right-hand side	FALSE	Uncertain
53	5	First	Right-hand side	Left-hand side	FALSE	Certain	Right-hand side	TRUE	Uncertain
54	5	First	Left-hand side	Left-hand side	TRUE	Certain	Left-hand side	TRUE	Certain
55	5	First	Left-hand side	Left-hand side	TRUE	Certain	Right-hand side	FALSE	Uncertain
56	5	First	Left-hand side	Left-hand side	TRUE	Uncertain	Right-hand side	FALSE	Uncertain
57	5	First	Left-hand side	Left-hand side	TRUE	Certain	Left-hand side	TRUE	Certain
58	5	First	Left-hand side	Right-hand side	FALSE	Certain	Left-hand side	TRUE	Certain
59	5	First	Right-hand side	Left-hand side	FALSE	Certain	Right-hand side	TRUE	Uncertain
60	5	First	Left-hand side	Left-hand side	TRUE	Certain	Left-hand side	TRUE	Certain
1	6	First	Left-hand side	Right-hand side	FALSE	Certain	Left-hand side	TRUE	Certain
2	6	First	Left-hand side	Right-hand side	FALSE	Certain	Left-hand side	TRUE	Certain
3	6	First	Left-hand side	Right-hand side	FALSE	Certain	Right-hand side	FALSE	Uncertain
4	6	First	Left-hand side	Left-hand side	TRUE	Certain	Right-hand side	FALSE	Certain
5	6	First	Right-hand side	Left-hand side	FALSE	Certain	Left-hand side	FALSE	Uncertain
6	6	First	Right-hand side	Right-hand side	TRUE	Certain	Right-hand side	TRUE	Certain
7	6	First	Left-hand side	Left-hand side	TRUE	Certain	Left-hand side	TRUE	Uncertain
8	6	First	Right-hand side	Right-hand side	TRUE	Certain	Right-hand side	TRUE	Certain
9	6	First	Left-hand side	Right-hand side	FALSE	Certain	Left-hand side	TRUE	Uncertain
10	6	First	Left-hand side	Right-hand side	FALSE	Certain	Right-hand side	FALSE	Certain
11	6	First	Right-hand side	Right-hand side	TRUE	Certain	Right-hand side	TRUE	Certain
12	6	First	Left-hand side	Left-hand side	TRUE	Certain	Left-hand side	TRUE	Uncertain
13	6	First	Right-hand side	Right-hand side	TRUE	Certain	Right-hand side	TRUE	Certain
14	6	First	Left-hand side	Left-hand side	TRUE	Certain	Right-hand side	FALSE	Certain
15	6	First	Right-hand side	Right-hand side	TRUE	Certain	Right-hand side	TRUE	Certain
16	6	First	Right-hand side	Right-hand side	TRUE	Certain	Right-hand side	TRUE	Certain
17	6	First	Left-hand side	Right-hand side	FALSE	Uncertain	Right-hand side	FALSE	Uncertain
18	6	First	Left-hand side	Left-hand side	TRUE	Certain	Left-hand side	TRUE	Uncertain
19	6	First	Right-hand side	Right-hand side	TRUE	Certain	Right-hand side	TRUE	Uncertain
20	6	First	Right-hand side	Right-hand side	TRUE	Certain	Left-hand side	FALSE	Certain
21	6	First	Left-hand side	Left-hand side	TRUE	Certain	Left-hand side	TRUE	Uncertain
22	6	First	Left-hand side	Right-hand side	FALSE	Certain	Right-hand side	FALSE	Uncertain
23	6	First	Left-hand side	Left-hand side	TRUE	Certain	Left-hand side	TRUE	Uncertain
24	6	First	Left-hand side	Left-hand side	TRUE	Certain	Left-hand side	TRUE	Certain
25	6	First	Right-hand side	Right-hand side	TRUE	Certain	Right-hand side	TRUE	Uncertain
26	6	First	Left-hand side	Right-hand side	FALSE	Certain	Left-hand side	TRUE	Uncertain
27	6	First	Right-hand side	Right-hand side	TRUE	Certain	Right-hand side	TRUE	Certain
28	6	First	Left-hand side	Left-hand side	TRUE	Uncertain	Left-hand side	TRUE	Certain
29	6	First	Right-hand side	Right-hand side	TRUE	Certain	Right-hand side	TRUE	Uncertain
30	6	First	Left-hand side	Left-hand side	TRUE	Certain	Left-hand side	TRUE	Uncertain
31	6	First	Right-hand side	Right-hand side	TRUE	Certain	Right-hand side	TRUE	Certain
32	6	First	Left-hand side	Left-hand side	TRUE	Certain	Right-hand side	FALSE	Uncertain
33	6	First	Right-hand side	Right-hand side	TRUE	Certain	Right-hand side	TRUE	Certain
34	6	First	Right-hand side	Right-hand side	TRUE	Certain	Right-hand side	TRUE	Certain
35	6	First	Left-hand side	Left-hand side	TRUE	Certain	Left-hand side	TRUE	Uncertain
36	6	First	Right-hand side	Left-hand side	FALSE	Certain	Left-hand side	FALSE	Certain
37	6	First	Right-hand side	Right-hand side	TRUE	Certain	Left-hand side	FALSE	Uncertain
38	6	First	Left-hand side	Left-hand side	TRUE	Certain	Left-hand side	TRUE	Certain
39	6	First	Left-hand side	Right-hand side	FALSE	Uncertain	Left-hand side	TRUE	Uncertain
40	6	First	Left-hand side	Right-hand side	FALSE	Certain	Right-hand side	FALSE	Certain
41	6	First	Left-hand side	Left-hand side	TRUE	Certain	Right-hand side	FALSE	Uncertain
42	6	First	Left-hand side	Left-hand side	TRUE	Certain	Left-hand side	TRUE	Uncertain
43	6	First	Right-hand side	Right-hand side	TRUE	Certain	Left-hand side	FALSE	Uncertain
44	6	First	Left-hand side	Right-hand side	FALSE	Certain	Right-hand side	FALSE	Certain
45	6	First	Right-hand side	Right-hand side	TRUE	Certain	Right-hand side	TRUE	Certain
46	6	First	Left-hand side	Right-hand side	FALSE	Certain	Left-hand side	TRUE	Certain
47	6	First	Left-hand side	Right-hand side	FALSE	Certain	Right-hand side	FALSE	Uncertain
48	6	First	Right-hand side	Right-hand side	TRUE	Certain	Right-hand side	TRUE	Certain
49	6	First	Left-hand side	Right-hand side	FALSE	Certain	Right-hand side	FALSE	Certain
50	6	First	Right-hand side	Right-hand side	TRUE	Certain	Right-hand side	TRUE	Certain
51	6	First	Right-hand side	Right-hand side	TRUE	Certain	Right-hand side	TRUE	Certain
52	6	First	Left-hand side	Right-hand side	FALSE	Certain	Left-hand side	TRUE	Certain
53	6	First	Left-hand side	Right-hand side	FALSE	Certain	Right-hand side	FALSE	Uncertain
54	6	First	Right-hand side	Right-hand side	TRUE	Certain	Right-hand side	TRUE	Certain
55	6	First	Right-hand side	Right-hand side	TRUE	Certain	Right-hand side	TRUE	Certain
56	6	First	Left-hand side	Right-hand side	FALSE	Certain	Right-hand side	FALSE	Certain
57	6	First	Left-hand side	Right-hand side	FALSE	Certain	Left-hand side	TRUE	Certain
58	6	First	Left-hand side	Right-hand side	FALSE	Certain	Left-hand side	TRUE	Certain
59	6	First	Right-hand side	Right-hand side	TRUE	Certain	Right-hand side	TRUE	Certain
60	6	First	Right-hand side	Right-hand side	TRUE	Certain	Right-hand side	TRUE	Uncertain
1	7	First	Right-hand side	Right-hand side	TRUE	Certain	Left-hand side	FALSE	Certain
2	7	First	Left-hand side	Left-hand side	TRUE	Certain	Right-hand side	FALSE	Certain
3	7	First	Left-hand side	Left-hand side	TRUE	Certain	Left-hand side	TRUE	Certain
4	7	First	Left-hand side	NA	FALSE	NA	Left-hand side	TRUE	Certain
5	7	First	Left-hand side	Left-hand side	TRUE	Certain	Left-hand side	TRUE	Certain
6	7	First	Right-hand side	Right-hand side	TRUE	Certain	Right-hand side	TRUE	Certain
7	7	First	Right-hand side	Right-hand side	TRUE	Certain	Right-hand side	TRUE	Uncertain
8	7	First	Right-hand side	Right-hand side	TRUE	Uncertain	Right-hand side	TRUE	Uncertain
9	7	First	Left-hand side	Left-hand side	TRUE	Uncertain	Left-hand side	TRUE	Certain
10	7	First	Right-hand side	Left-hand side	FALSE	Certain	Right-hand side	TRUE	Certain
11	7	First	Left-hand side	Right-hand side	FALSE	Certain	Left-hand side	TRUE	Certain
12	7	First	Right-hand side	Left-hand side	FALSE	Certain	Left-hand side	FALSE	Uncertain
13	7	First	Left-hand side	Left-hand side	TRUE	Certain	Right-hand side	FALSE	Certain
14	7	First	Left-hand side	Left-hand side	TRUE	Certain	Left-hand side	TRUE	Certain
15	7	First	Right-hand side	Right-hand side	TRUE	Certain	Right-hand side	TRUE	Certain
16	7	First	Right-hand side	Right-hand side	TRUE	Certain	Right-hand side	TRUE	Uncertain
17	7	First	Right-hand side	Right-hand side	TRUE	Certain	Right-hand side	TRUE	Certain
18	7	First	Right-hand side	Left-hand side	FALSE	Certain	Left-hand side	FALSE	Certain
19	7	First	Left-hand side	Left-hand side	TRUE	Certain	Right-hand side	FALSE	Certain
20	7	First	Left-hand side	Left-hand side	TRUE	Certain	Right-hand side	FALSE	Uncertain
21	7	First	Right-hand side	Right-hand side	TRUE	Certain	Right-hand side	TRUE	Certain
22	7	First	Right-hand side	NA	FALSE	NA	Left-hand side	FALSE	Certain
23	7	First	Right-hand side	Left-hand side	FALSE	Certain	Right-hand side	TRUE	Certain
24	7	First	Right-hand side	Left-hand side	FALSE	Certain	Right-hand side	TRUE	Certain
25	7	First	Right-hand side	Right-hand side	TRUE	Certain	Right-hand side	TRUE	Certain
26	7	First	Left-hand side	Right-hand side	FALSE	Certain	Left-hand side	TRUE	Uncertain
27	7	First	Left-hand side	Left-hand side	TRUE	Certain	Left-hand side	TRUE	Certain
28	7	First	Right-hand side	Left-hand side	FALSE	Certain	Left-hand side	FALSE	Certain
29	7	First	Right-hand side	Left-hand side	FALSE	Certain	Right-hand side	TRUE	Certain
30	7	First	Right-hand side	Left-hand side	FALSE	Certain	Left-hand side	FALSE	Certain
31	7	First	Left-hand side	Left-hand side	TRUE	Certain	Left-hand side	TRUE	Certain
32	7	First	Left-hand side	Left-hand side	TRUE	Certain	Left-hand side	TRUE	Certain
33	7	First	Left-hand side	Left-hand side	TRUE	Certain	Right-hand side	FALSE	Certain
34	7	First	Right-hand side	Right-hand side	TRUE	Certain	Left-hand side	FALSE	Certain
35	7	First	Left-hand side	Left-hand side	TRUE	Certain	Left-hand side	TRUE	Certain
36	7	First	Right-hand side	Right-hand side	TRUE	Certain	Left-hand side	FALSE	Certain
37	7	First	Left-hand side	Left-hand side	TRUE	Certain	Right-hand side	FALSE	Certain
38	7	First	Left-hand side	Right-hand side	FALSE	Certain	Left-hand side	TRUE	Uncertain
39	7	First	Left-hand side	Left-hand side	TRUE	Certain	Right-hand side	FALSE	Certain
40	7	First	Left-hand side	Left-hand side	TRUE	Certain	Left-hand side	TRUE	Certain
41	7	First	Right-hand side	Right-hand side	TRUE	Certain	Right-hand side	TRUE	Certain
42	7	First	Right-hand side	Right-hand side	TRUE	Certain	Left-hand side	FALSE	Certain
43	7	First	Right-hand side	Right-hand side	TRUE	Certain	Right-hand side	TRUE	Certain
44	7	First	Right-hand side	Left-hand side	FALSE	Certain	Right-hand side	TRUE	Uncertain
45	7	First	Right-hand side	Right-hand side	TRUE	Certain	Right-hand side	TRUE	Certain
46	7	First	Right-hand side	Right-hand side	TRUE	Certain	Left-hand side	FALSE	Uncertain
47	7	First	Left-hand side	Right-hand side	FALSE	Uncertain	Right-hand side	FALSE	Certain
48	7	First	Left-hand side	Right-hand side	FALSE	Certain	Left-hand side	TRUE	Uncertain
49	7	First	Right-hand side	Right-hand side	TRUE	Certain	Right-hand side	TRUE	Certain
50	7	First	Left-hand side	Left-hand side	TRUE	Certain	Left-hand side	TRUE	Certain
51	7	First	Right-hand side	Right-hand side	TRUE	Uncertain	Left-hand side	FALSE	Certain
52	7	First	Right-hand side	Left-hand side	FALSE	Certain	Left-hand side	FALSE	Certain
53	7	First	Right-hand side	Right-hand side	TRUE	Certain	Right-hand side	TRUE	Certain
54	7	First	Left-hand side	Left-hand side	TRUE	Certain	Right-hand side	FALSE	Certain
55	7	First	Right-hand side	Right-hand side	TRUE	Certain	Right-hand side	TRUE	Certain
56	7	First	Right-hand side	Right-hand side	TRUE	Certain	Left-hand side	FALSE	Certain
57	7	First	Left-hand side	Left-hand side	TRUE	Certain	Right-hand side	FALSE	Certain
58	7	First	Left-hand side	Left-hand side	TRUE	Certain	Right-hand side	FALSE	Uncertain
59	7	First	Left-hand side	Right-hand side	FALSE	Certain	Left-hand side	TRUE	Certain
60	7	First	Right-hand side	Left-hand side	FALSE	Certain	Left-hand side	FALSE	Certain
1	8	First	Right-hand side	Right-hand side	TRUE	Certain	Left-hand side	FALSE	Certain
2	8	First	Left-hand side	Left-hand side	TRUE	Certain	Right-hand side	FALSE	Certain
3	8	First	Right-hand side	Right-hand side	TRUE	Certain	Right-hand side	TRUE	Certain
4	8	First	Left-hand side	Left-hand side	TRUE	Certain	Left-hand side	TRUE	Certain
5	8	First	Left-hand side	Left-hand side	TRUE	Certain	Right-hand side	FALSE	Certain
6	8	First	Right-hand side	Right-hand side	TRUE	Certain	Right-hand side	TRUE	Certain
7	8	First	Left-hand side	Left-hand side	TRUE	Certain	Right-hand side	FALSE	Certain
8	8	First	Right-hand side	Right-hand side	TRUE	Certain	Right-hand side	TRUE	Certain
9	8	First	Right-hand side	Left-hand side	FALSE	Certain	Right-hand side	TRUE	Certain
10	8	First	Right-hand side	Right-hand side	TRUE	Certain	Left-hand side	FALSE	Uncertain
11	8	First	Left-hand side	Left-hand side	TRUE	Uncertain	Right-hand side	FALSE	Uncertain
12	8	First	Left-hand side	Left-hand side	TRUE	Certain	Left-hand side	TRUE	Certain
13	8	First	Left-hand side	Right-hand side	FALSE	Certain	Right-hand side	FALSE	Certain
14	8	First	Left-hand side	Left-hand side	TRUE	Uncertain	Right-hand side	FALSE	NA
15	8	First	Right-hand side	Right-hand side	TRUE	Certain	Right-hand side	TRUE	Uncertain
16	8	First	Right-hand side	Left-hand side	FALSE	Certain	Right-hand side	TRUE	Certain
17	8	First	Right-hand side	Right-hand side	TRUE	Certain	Right-hand side	TRUE	Uncertain
18	8	First	Left-hand side	Left-hand side	TRUE	Certain	Right-hand side	FALSE	Uncertain
19	8	First	Right-hand side	Right-hand side	TRUE	Certain	Right-hand side	TRUE	Uncertain
20	8	First	Right-hand side	Right-hand side	TRUE	Certain	Right-hand side	TRUE	Certain
21	8	First	Right-hand side	Right-hand side	TRUE	Certain	Right-hand side	TRUE	Certain
22	8	First	Right-hand side	Right-hand side	TRUE	Certain	Right-hand side	TRUE	Uncertain
23	8	First	Left-hand side	Right-hand side	FALSE	Uncertain	Right-hand side	FALSE	Uncertain
24	8	First	Left-hand side	Right-hand side	FALSE	Certain	Right-hand side	FALSE	Uncertain
25	8	First	Right-hand side	Right-hand side	TRUE	Uncertain	Right-hand side	TRUE	Uncertain
26	8	First	Right-hand side	Right-hand side	TRUE	Certain	Right-hand side	TRUE	Uncertain
27	8	First	Left-hand side	Left-hand side	TRUE	Certain	Left-hand side	TRUE	Uncertain
28	8	First	Right-hand side	Right-hand side	TRUE	Certain	Right-hand side	TRUE	Certain
29	8	First	Right-hand side	Right-hand side	TRUE	Certain	Right-hand side	TRUE	Certain
30	8	First	Right-hand side	Left-hand side	FALSE	Uncertain	Right-hand side	TRUE	Certain
31	8	First	Right-hand side	Right-hand side	TRUE	Certain	Left-hand side	FALSE	Uncertain
32	8	First	Left-hand side	Left-hand side	TRUE	Certain	Left-hand side	TRUE	Uncertain
33	8	First	Right-hand side	Left-hand side	FALSE	Certain	Right-hand side	TRUE	Uncertain
34	8	First	Right-hand side	Right-hand side	TRUE	Certain	Right-hand side	TRUE	Uncertain
35	8	First	Right-hand side	Right-hand side	TRUE	Certain	Right-hand side	TRUE	Uncertain
36	8	First	Right-hand side	Right-hand side	TRUE	Certain	Right-hand side	TRUE	Certain
37	8	First	Right-hand side	Left-hand side	FALSE	Uncertain	Right-hand side	TRUE	Certain
38	8	First	Right-hand side	Right-hand side	TRUE	Certain	Right-hand side	TRUE	Certain
39	8	First	Left-hand side	Left-hand side	TRUE	Certain	Right-hand side	FALSE	Certain
40	8	First	Left-hand side	Left-hand side	TRUE	Certain	Right-hand side	FALSE	Uncertain
41	8	First	Left-hand side	Left-hand side	TRUE	Certain	Left-hand side	TRUE	Uncertain
42	8	First	Right-hand side	Right-hand side	TRUE	Certain	Right-hand side	TRUE	Certain
43	8	First	Right-hand side	Right-hand side	TRUE	Uncertain	Left-hand side	FALSE	Certain
44	8	First	Right-hand side	Right-hand side	TRUE	Certain	Right-hand side	TRUE	Uncertain
45	8	First	Right-hand side	Right-hand side	TRUE	Certain	Right-hand side	TRUE	Uncertain
46	8	First	Right-hand side	Right-hand side	TRUE	Certain	Right-hand side	TRUE	Certain
47	8	First	Left-hand side	Right-hand side	FALSE	Uncertain	Right-hand side	FALSE	Certain
48	8	First	Right-hand side	Right-hand side	TRUE	Certain	Left-hand side	FALSE	Certain
49	8	First	Left-hand side	Right-hand side	FALSE	Certain	Right-hand side	FALSE	Uncertain
50	8	First	Left-hand side	Right-hand side	FALSE	Certain	Right-hand side	FALSE	Uncertain
51	8	First	Left-hand side	Left-hand side	TRUE	Certain	Left-hand side	TRUE	Certain
52	8	First	Left-hand side	Right-hand side	FALSE	Certain	Right-hand side	FALSE	Uncertain
53	8	First	Right-hand side	Right-hand side	TRUE	Certain	Right-hand side	TRUE	Certain
54	8	First	Right-hand side	Right-hand side	TRUE	Certain	Right-hand side	TRUE	Certain
55	8	First	Left-hand side	Left-hand side	TRUE	Certain	Left-hand side	TRUE	Certain
56	8	First	Left-hand side	Right-hand side	FALSE	Certain	Left-hand side	TRUE	Uncertain
57	8	First	Right-hand side	Right-hand side	TRUE	Uncertain	Right-hand side	TRUE	Uncertain
58	8	First	Right-hand side	Right-hand side	TRUE	Certain	Right-hand side	TRUE	Certain
59	8	First	Right-hand side	Left-hand side	FALSE	Certain	Left-hand side	FALSE	Certain
60	8	First	Left-hand side	Right-hand side	FALSE	Certain	Right-hand side	FALSE	Uncertain
1	9	First	Right-hand side	Right-hand side	TRUE	Certain	Left-hand side	FALSE	Uncertain
2	9	First	Right-hand side	Right-hand side	TRUE	Certain	Right-hand side	TRUE	Certain
3	9	First	Left-hand side	Left-hand side	TRUE	Certain	Left-hand side	TRUE	Certain
4	9	First	Left-hand side	Left-hand side	TRUE	Certain	Right-hand side	FALSE	Uncertain
5	9	First	Left-hand side	Left-hand side	TRUE	Certain	Left-hand side	TRUE	Certain
6	9	First	Right-hand side	Right-hand side	TRUE	Certain	Right-hand side	TRUE	Certain
7	9	First	Right-hand side	Right-hand side	TRUE	Certain	Right-hand side	TRUE	Certain
8	9	First	Right-hand side	Right-hand side	TRUE	Certain	Right-hand side	TRUE	Certain
9	9	First	Left-hand side	Right-hand side	FALSE	Uncertain	Left-hand side	TRUE	Certain
10	9	First	Right-hand side	Right-hand side	TRUE	Uncertain	Left-hand side	FALSE	Uncertain
11	9	First	Right-hand side	Right-hand side	TRUE	Certain	Right-hand side	TRUE	Certain
12	9	First	Right-hand side	Right-hand side	TRUE	Uncertain	Left-hand side	FALSE	Certain
13	9	First	Left-hand side	Right-hand side	FALSE	Certain	Left-hand side	TRUE	Uncertain
14	9	First	Left-hand side	Left-hand side	TRUE	Certain	Left-hand side	TRUE	Certain
15	9	First	Left-hand side	Right-hand side	FALSE	Uncertain	Left-hand side	TRUE	Uncertain
16	9	First	Right-hand side	Right-hand side	TRUE	Certain	Right-hand side	TRUE	Certain
17	9	First	Right-hand side	Right-hand side	TRUE	Certain	Right-hand side	TRUE	Certain
18	9	First	Right-hand side	Right-hand side	TRUE	Certain	Right-hand side	TRUE	Certain
19	9	First	Left-hand side	Right-hand side	FALSE	Uncertain	Right-hand side	FALSE	Uncertain
20	9	First	Right-hand side	Right-hand side	TRUE	Certain	Right-hand side	TRUE	Certain
21	9	First	Left-hand side	Right-hand side	FALSE	Certain	Left-hand side	TRUE	Certain
22	9	First	Right-hand side	Right-hand side	TRUE	Certain	Right-hand side	TRUE	Certain
23	9	First	Right-hand side	Right-hand side	TRUE	Certain	Right-hand side	TRUE	Certain
24	9	First	Right-hand side	Right-hand side	TRUE	Uncertain	Right-hand side	TRUE	Uncertain
25	9	First	Left-hand side	Right-hand side	FALSE	Uncertain	Left-hand side	TRUE	Uncertain
26	9	First	Right-hand side	Right-hand side	TRUE	Certain	Right-hand side	TRUE	Certain
27	9	First	Left-hand side	Right-hand side	FALSE	Uncertain	Left-hand side	TRUE	Uncertain
28	9	First	Right-hand side	Right-hand side	TRUE	Certain	Right-hand side	TRUE	Certain
29	9	First	Right-hand side	Right-hand side	TRUE	Certain	Right-hand side	TRUE	Uncertain
30	9	First	Left-hand side	Right-hand side	FALSE	Uncertain	Left-hand side	TRUE	Certain
31	9	First	Right-hand side	Right-hand side	TRUE	Certain	Right-hand side	TRUE	Certain
32	9	First	Right-hand side	Right-hand side	TRUE	Certain	Right-hand side	TRUE	Certain
33	9	First	Right-hand side	Right-hand side	TRUE	Certain	Right-hand side	TRUE	Certain
34	9	First	Left-hand side	Right-hand side	FALSE	Certain	Left-hand side	TRUE	Certain
35	9	First	Left-hand side	Right-hand side	FALSE	Uncertain	Left-hand side	TRUE	Uncertain
36	9	First	Left-hand side	Left-hand side	TRUE	Uncertain	Right-hand side	FALSE	Uncertain
37	9	First	Left-hand side	Right-hand side	FALSE	Uncertain	Left-hand side	TRUE	Certain
38	9	First	Right-hand side	Left-hand side	FALSE	Certain	Left-hand side	FALSE	Certain
39	9	First	Left-hand side	Right-hand side	FALSE	Certain	Right-hand side	FALSE	Certain
40	9	First	Left-hand side	Right-hand side	FALSE	Certain	Left-hand side	TRUE	Uncertain
41	9	First	Right-hand side	Right-hand side	TRUE	Uncertain	Left-hand side	FALSE	Certain
42	9	First	Right-hand side	Right-hand side	TRUE	Certain	Right-hand side	TRUE	Certain
43	9	First	Left-hand side	Right-hand side	FALSE	Uncertain	Left-hand side	TRUE	Uncertain
44	9	First	Left-hand side	Right-hand side	FALSE	Certain	Right-hand side	FALSE	Uncertain
45	9	First	Left-hand side	Left-hand side	TRUE	Certain	Right-hand side	FALSE	Certain
46	9	First	Right-hand side	Left-hand side	FALSE	Uncertain	Right-hand side	TRUE	Uncertain
47	9	First	Left-hand side	Right-hand side	FALSE	Uncertain	Right-hand side	FALSE	Certain
48	9	First	Left-hand side	Left-hand side	TRUE	Uncertain	Left-hand side	TRUE	Certain
49	9	First	Right-hand side	Left-hand side	FALSE	Uncertain	Left-hand side	FALSE	Uncertain
50	9	First	Left-hand side	Right-hand side	FALSE	Certain	Right-hand side	FALSE	Certain
51	9	First	Right-hand side	Left-hand side	FALSE	Certain	Left-hand side	FALSE	Uncertain
52	9	First	Right-hand side	Right-hand side	TRUE	Uncertain	Right-hand side	TRUE	Uncertain
53	9	First	Left-hand side	Right-hand side	FALSE	Uncertain	Right-hand side	FALSE	Certain
54	9	First	Right-hand side	Right-hand side	TRUE	Certain	Right-hand side	TRUE	Certain
55	9	First	Right-hand side	Left-hand side	FALSE	NA	Right-hand side	TRUE	Certain
56	9	First	Right-hand side	Right-hand side	TRUE	Uncertain	Left-hand side	FALSE	Uncertain
57	9	First	Right-hand side	Left-hand side	FALSE	Uncertain	Right-hand side	TRUE	Certain
58	9	First	Right-hand side	Right-hand side	TRUE	Uncertain	Right-hand side	TRUE	Certain
59	9	First	Left-hand side	Right-hand side	FALSE	Certain	Right-hand side	FALSE	Certain
60	9	First	Left-hand side	Right-hand side	FALSE	Certain	Right-hand side	FALSE	Uncertain
1	10	First	Right-hand side	Left-hand side	FALSE	Certain	Right-hand side	TRUE	Uncertain
2	10	First	Right-hand side	Right-hand side	TRUE	Certain	Right-hand side	TRUE	Uncertain
3	10	First	Left-hand side	Left-hand side	TRUE	Certain	Left-hand side	TRUE	Certain
4	10	First	Left-hand side	Right-hand side	FALSE	Certain	Left-hand side	TRUE	Certain
5	10	First	Left-hand side	Left-hand side	TRUE	Certain	Left-hand side	TRUE	Certain
6	10	First	Left-hand side	Left-hand side	TRUE	Certain	Right-hand side	FALSE	Uncertain
7	10	First	Left-hand side	Left-hand side	TRUE	Certain	Left-hand side	TRUE	Certain
8	10	First	Left-hand side	Left-hand side	TRUE	Certain	Left-hand side	TRUE	Certain
9	10	First	Left-hand side	Left-hand side	TRUE	Certain	Left-hand side	TRUE	Certain
10	10	First	Left-hand side	Right-hand side	FALSE	Uncertain	Left-hand side	TRUE	Certain
11	10	First	Right-hand side	Left-hand side	FALSE	Certain	Right-hand side	TRUE	Uncertain
12	10	First	Left-hand side	Right-hand side	FALSE	Uncertain	Left-hand side	TRUE	Certain
13	10	First	Right-hand side	Right-hand side	TRUE	Certain	Right-hand side	TRUE	Uncertain
14	10	First	Left-hand side	Left-hand side	TRUE	Certain	Left-hand side	TRUE	Uncertain
15	10	First	Left-hand side	Left-hand side	TRUE	Certain	Left-hand side	TRUE	Certain
16	10	First	Right-hand side	Right-hand side	TRUE	Certain	Right-hand side	TRUE	Uncertain
17	10	First	Right-hand side	Left-hand side	FALSE	NA	Right-hand side	TRUE	Uncertain
18	10	First	Left-hand side	Right-hand side	FALSE	Certain	Left-hand side	TRUE	Certain
19	10	First	Right-hand side	Right-hand side	TRUE	Certain	Right-hand side	TRUE	Uncertain
20	10	First	Left-hand side	Left-hand side	TRUE	Certain	Left-hand side	TRUE	Certain
21	10	First	Right-hand side	Right-hand side	TRUE	Certain	Right-hand side	TRUE	Uncertain
22	10	First	Left-hand side	Left-hand side	TRUE	Certain	Left-hand side	TRUE	Certain
23	10	First	Left-hand side	Right-hand side	FALSE	Certain	Right-hand side	FALSE	Uncertain
24	10	First	Left-hand side	Left-hand side	TRUE	Certain	Left-hand side	TRUE	Certain
25	10	First	Left-hand side	Left-hand side	TRUE	Uncertain	Right-hand side	FALSE	Uncertain
26	10	First	Left-hand side	Left-hand side	TRUE	Certain	Left-hand side	TRUE	Certain
27	10	First	Right-hand side	Right-hand side	TRUE	Certain	Right-hand side	TRUE	Uncertain
28	10	First	Left-hand side	Right-hand side	FALSE	Certain	Left-hand side	TRUE	Certain
29	10	First	Left-hand side	Right-hand side	FALSE	Certain	Right-hand side	FALSE	Uncertain
30	10	First	Right-hand side	Right-hand side	TRUE	Certain	Right-hand side	TRUE	Uncertain
31	10	First	Left-hand side	Right-hand side	FALSE	Certain	Left-hand side	TRUE	Uncertain
32	10	First	Right-hand side	Right-hand side	TRUE	Certain	Right-hand side	TRUE	Certain
33	10	First	Left-hand side	Left-hand side	TRUE	Uncertain	Left-hand side	TRUE	Certain
34	10	First	Left-hand side	Right-hand side	FALSE	Certain	Right-hand side	FALSE	Certain
35	10	First	Right-hand side	Right-hand side	TRUE	Certain	Right-hand side	TRUE	Certain
36	10	First	Right-hand side	Right-hand side	TRUE	Certain	Right-hand side	TRUE	Certain
37	10	First	Left-hand side	Left-hand side	TRUE	Certain	Right-hand side	FALSE	Certain
38	10	First	Left-hand side	Left-hand side	TRUE	Certain	Left-hand side	TRUE	Certain
39	10	First	Left-hand side	Left-hand side	TRUE	Uncertain	Left-hand side	TRUE	Certain
40	10	First	Right-hand side	Right-hand side	TRUE	Certain	Right-hand side	TRUE	Certain
41	10	First	Left-hand side	Left-hand side	TRUE	Certain	Left-hand side	TRUE	Certain
42	10	First	Left-hand side	Left-hand side	TRUE	Certain	Left-hand side	TRUE	Certain
43	10	First	Right-hand side	Right-hand side	TRUE	Certain	Right-hand side	TRUE	Certain
44	10	First	Right-hand side	Right-hand side	TRUE	Certain	Right-hand side	TRUE	Certain
45	10	First	Right-hand side	Right-hand side	TRUE	Uncertain	Right-hand side	TRUE	Certain
46	10	First	Left-hand side	Left-hand side	TRUE	Certain	Left-hand side	TRUE	Certain
47	10	First	Left-hand side	Left-hand side	TRUE	Certain	Right-hand side	FALSE	Certain
48	10	First	Right-hand side	Right-hand side	TRUE	Certain	Left-hand side	FALSE	Certain
49	10	First	Left-hand side	Left-hand side	TRUE	Certain	Right-hand side	FALSE	Uncertain
50	10	First	Right-hand side	Right-hand side	TRUE	Certain	Right-hand side	TRUE	Certain
51	10	First	Right-hand side	Right-hand side	TRUE	Certain	Right-hand side	TRUE	Certain
52	10	First	Left-hand side	Right-hand side	FALSE	Uncertain	Right-hand side	FALSE	Certain
53	10	First	Right-hand side	Right-hand side	TRUE	Certain	Right-hand side	TRUE	Certain
54	10	First	Left-hand side	Left-hand side	TRUE	Uncertain	Right-hand side	FALSE	Certain
55	10	First	Right-hand side	Right-hand side	TRUE	Certain	Right-hand side	TRUE	Certain
56	10	First	Left-hand side	Left-hand side	TRUE	Certain	Left-hand side	TRUE	Certain
57	10	First	Left-hand side	Left-hand side	TRUE	Certain	Left-hand side	TRUE	Certain
58	10	First	Right-hand side	Right-hand side	TRUE	Certain	Right-hand side	TRUE	Certain
59	10	First	Left-hand side	Right-hand side	FALSE	Uncertain	Right-hand side	FALSE	Certain
60	10	First	Left-hand side	Right-hand side	FALSE	Uncertain	Left-hand side	TRUE	Certain
1	11	First	Right-hand side	Left-hand side	FALSE	Uncertain	Right-hand side	TRUE	Uncertain
2	11	First	Left-hand side	Right-hand side	FALSE	Certain	Left-hand side	TRUE	Certain
3	11	First	Left-hand side	Right-hand side	FALSE	Certain	Left-hand side	TRUE	Uncertain
4	11	First	Right-hand side	Right-hand side	TRUE	Certain	Right-hand side	TRUE	Certain
5	11	First	Right-hand side	Right-hand side	TRUE	Certain	Right-hand side	TRUE	Certain
6	11	First	Left-hand side	Right-hand side	FALSE	Certain	Right-hand side	FALSE	Uncertain
7	11	First	Left-hand side	Right-hand side	FALSE	NA	Right-hand side	FALSE	Uncertain
8	11	First	Left-hand side	Left-hand side	TRUE	Uncertain	Left-hand side	TRUE	Uncertain
9	11	First	Left-hand side	Left-hand side	TRUE	Certain	Left-hand side	TRUE	Uncertain
10	11	First	Right-hand side	Right-hand side	TRUE	Uncertain	Left-hand side	FALSE	Certain
11	11	First	Right-hand side	Right-hand side	TRUE	Certain	Right-hand side	TRUE	Certain
12	11	First	Left-hand side	Right-hand side	FALSE	Certain	Right-hand side	FALSE	Certain
13	11	First	Right-hand side	Right-hand side	TRUE	Certain	Left-hand side	FALSE	Uncertain
14	11	First	Right-hand side	Left-hand side	FALSE	Uncertain	Left-hand side	FALSE	Uncertain
15	11	First	Left-hand side	Left-hand side	TRUE	Uncertain	Right-hand side	FALSE	Uncertain
16	11	First	Left-hand side	Right-hand side	FALSE	Certain	Right-hand side	FALSE	Uncertain
17	11	First	Right-hand side	Right-hand side	TRUE	Certain	Right-hand side	TRUE	Certain
18	11	First	Right-hand side	Right-hand side	TRUE	Certain	Right-hand side	TRUE	Certain
19	11	First	Left-hand side	Left-hand side	TRUE	Certain	Left-hand side	TRUE	Uncertain
20	11	First	Right-hand side	Right-hand side	TRUE	Certain	Left-hand side	FALSE	Uncertain
21	11	First	Left-hand side	Left-hand side	TRUE	Certain	Left-hand side	TRUE	Certain
22	11	First	Left-hand side	Right-hand side	FALSE	Certain	Right-hand side	FALSE	Uncertain
23	11	First	Left-hand side	Right-hand side	FALSE	Certain	Left-hand side	TRUE	Certain
24	11	First	Right-hand side	Right-hand side	TRUE	Certain	Right-hand side	TRUE	Certain
25	11	First	Right-hand side	Right-hand side	TRUE	NA	Right-hand side	TRUE	Certain
26	11	First	Right-hand side	Left-hand side	FALSE	NA	Right-hand side	TRUE	Uncertain
27	11	First	Right-hand side	Right-hand side	TRUE	Certain	Right-hand side	TRUE	Uncertain
28	11	First	Right-hand side	Right-hand side	TRUE	Certain	Right-hand side	TRUE	Uncertain
29	11	First	Right-hand side	Right-hand side	TRUE	Certain	Right-hand side	TRUE	Certain
30	11	First	Left-hand side	Left-hand side	TRUE	NA	Left-hand side	TRUE	Uncertain
31	11	First	Left-hand side	Right-hand side	FALSE	Uncertain	Left-hand side	TRUE	Uncertain
32	11	First	Right-hand side	Right-hand side	TRUE	Certain	Right-hand side	TRUE	Uncertain
33	11	First	Right-hand side	Right-hand side	TRUE	Certain	Right-hand side	TRUE	Certain
34	11	First	Right-hand side	Right-hand side	TRUE	Certain	Right-hand side	TRUE	Uncertain
35	11	First	Right-hand side	Right-hand side	TRUE	Certain	Right-hand side	TRUE	Certain
36	11	First	Right-hand side	Right-hand side	TRUE	Uncertain	Right-hand side	TRUE	Uncertain
37	11	First	Right-hand side	Right-hand side	TRUE	Certain	Right-hand side	TRUE	Certain
38	11	First	Right-hand side	Right-hand side	TRUE	Certain	Right-hand side	TRUE	Certain
39	11	First	Right-hand side	Right-hand side	TRUE	Certain	Right-hand side	TRUE	Certain
40	11	First	Right-hand side	Right-hand side	TRUE	Certain	Right-hand side	TRUE	Certain
41	11	First	Left-hand side	Right-hand side	FALSE	Certain	Right-hand side	FALSE	Uncertain
42	11	First	Right-hand side	Right-hand side	TRUE	Certain	Right-hand side	TRUE	Certain
43	11	First	Left-hand side	Right-hand side	FALSE	Certain	Right-hand side	FALSE	Certain
44	11	First	Right-hand side	Right-hand side	TRUE	Certain	Right-hand side	TRUE	Uncertain
45	11	First	Left-hand side	Right-hand side	FALSE	Uncertain	Right-hand side	FALSE	Certain
46	11	First	Right-hand side	Right-hand side	TRUE	Certain	Right-hand side	TRUE	Uncertain
47	11	First	Right-hand side	Right-hand side	TRUE	Uncertain	Right-hand side	TRUE	Certain
48	11	First	Right-hand side	Right-hand side	TRUE	Certain	Left-hand side	FALSE	Uncertain
49	11	First	Right-hand side	Left-hand side	FALSE	Certain	Right-hand side	TRUE	Certain
50	11	First	Left-hand side	Left-hand side	TRUE	Certain	Right-hand side	FALSE	Uncertain
51	11	First	Right-hand side	Right-hand side	TRUE	Certain	Right-hand side	TRUE	Uncertain
52	11	First	Left-hand side	Left-hand side	TRUE	Uncertain	Right-hand side	FALSE	Uncertain
53	11	First	Right-hand side	Right-hand side	TRUE	Certain	Right-hand side	TRUE	Uncertain
54	11	First	Left-hand side	Left-hand side	TRUE	Uncertain	Right-hand side	FALSE	Uncertain
55	11	First	Left-hand side	Left-hand side	TRUE	Certain	Right-hand side	FALSE	Uncertain
56	11	First	Left-hand side	Left-hand side	TRUE	Certain	Left-hand side	TRUE	Uncertain
57	11	First	Right-hand side	Right-hand side	TRUE	Certain	Right-hand side	TRUE	Certain
58	11	First	Right-hand side	Right-hand side	TRUE	Certain	Right-hand side	TRUE	Certain
59	11	First	Left-hand side	Right-hand side	FALSE	Certain	Left-hand side	TRUE	Uncertain
60	11	First	Right-hand side	Right-hand side	TRUE	Uncertain	Right-hand side	TRUE	Uncertain
1	12	First	Left-hand side	Left-hand side	TRUE	Certain	Left-hand side	TRUE	Certain
2	12	First	Left-hand side	Left-hand side	TRUE	Certain	Left-hand side	TRUE	Certain
3	12	First	Left-hand side	Left-hand side	TRUE	Certain	Left-hand side	TRUE	Certain
4	12	First	Right-hand side	Right-hand side	TRUE	Certain	Right-hand side	TRUE	Certain
5	12	First	Right-hand side	Right-hand side	TRUE	NA	Right-hand side	TRUE	Certain
6	12	First	Right-hand side	Right-hand side	TRUE	Certain	Right-hand side	TRUE	Certain
7	12	First	Right-hand side	Right-hand side	TRUE	Uncertain	Right-hand side	TRUE	Certain
8	12	First	Right-hand side	Right-hand side	TRUE	Certain	Right-hand side	TRUE	Certain
9	12	First	Right-hand side	Right-hand side	TRUE	Uncertain	Left-hand side	FALSE	Certain
10	12	First	Left-hand side	Left-hand side	TRUE	Uncertain	Left-hand side	TRUE	Certain
11	12	First	Right-hand side	Right-hand side	TRUE	Certain	Left-hand side	FALSE	Uncertain
12	12	First	Left-hand side	Left-hand side	TRUE	Certain	Left-hand side	TRUE	Certain
13	12	First	Left-hand side	Left-hand side	TRUE	Certain	Left-hand side	TRUE	Uncertain
14	12	First	Left-hand side	Left-hand side	TRUE	Certain	Left-hand side	TRUE	Certain
15	12	First	Right-hand side	Right-hand side	TRUE	Uncertain	Right-hand side	TRUE	Certain
16	12	First	Left-hand side	Left-hand side	TRUE	Uncertain	Left-hand side	TRUE	Uncertain
17	12	First	Left-hand side	Left-hand side	TRUE	Certain	Left-hand side	TRUE	Uncertain
18	12	First	Right-hand side	Right-hand side	TRUE	Certain	Right-hand side	TRUE	Certain
19	12	First	Right-hand side	Right-hand side	TRUE	Certain	Right-hand side	TRUE	Certain
20	12	First	Right-hand side	Left-hand side	FALSE	Uncertain	Right-hand side	TRUE	Uncertain
21	12	First	Right-hand side	Left-hand side	FALSE	Uncertain	Left-hand side	FALSE	Uncertain
22	12	First	Left-hand side	Right-hand side	FALSE	Uncertain	Left-hand side	TRUE	Uncertain
23	12	First	Left-hand side	Left-hand side	TRUE	Certain	Left-hand side	TRUE	Uncertain
24	12	First	Left-hand side	Left-hand side	TRUE	Certain	Left-hand side	TRUE	Certain
25	12	First	Right-hand side	Right-hand side	TRUE	Certain	Right-hand side	TRUE	Uncertain
26	12	First	Left-hand side	Right-hand side	FALSE	Certain	Right-hand side	FALSE	Uncertain
27	12	First	Right-hand side	Right-hand side	TRUE	Certain	Left-hand side	FALSE	Uncertain
28	12	First	Left-hand side	Left-hand side	TRUE	Certain	Left-hand side	TRUE	Uncertain
29	12	First	Left-hand side	Left-hand side	TRUE	Certain	Left-hand side	TRUE	Uncertain
30	12	First	Left-hand side	Left-hand side	TRUE	Certain	Left-hand side	TRUE	Uncertain
31	12	First	Right-hand side	Right-hand side	TRUE	Certain	Right-hand side	TRUE	Uncertain
32	12	First	Left-hand side	Right-hand side	FALSE	Certain	Right-hand side	FALSE	Uncertain
33	12	First	Right-hand side	Left-hand side	FALSE	Uncertain	Right-hand side	TRUE	Uncertain
34	12	First	Left-hand side	Left-hand side	TRUE	Certain	Left-hand side	TRUE	Uncertain
35	12	First	Right-hand side	Right-hand side	TRUE	Certain	Right-hand side	TRUE	Certain
36	12	First	Right-hand side	Right-hand side	TRUE	Certain	Right-hand side	TRUE	Certain
37	12	First	Left-hand side	Left-hand side	TRUE	Certain	Left-hand side	TRUE	Uncertain
38	12	First	Left-hand side	Left-hand side	TRUE	Uncertain	Left-hand side	TRUE	Uncertain
39	12	First	Right-hand side	Left-hand side	FALSE	Uncertain	Right-hand side	TRUE	Uncertain
40	12	First	Left-hand side	Right-hand side	FALSE	Uncertain	Right-hand side	FALSE	Certain
41	12	First	Right-hand side	Right-hand side	TRUE	Certain	Right-hand side	TRUE	Certain
42	12	First	Left-hand side	Left-hand side	TRUE	Uncertain	Right-hand side	FALSE	Uncertain
43	12	First	Left-hand side	Left-hand side	TRUE	Certain	Left-hand side	TRUE	Uncertain
44	12	First	Left-hand side	Left-hand side	TRUE	Uncertain	Left-hand side	TRUE	Uncertain
45	12	First	Right-hand side	Right-hand side	TRUE	Certain	Right-hand side	TRUE	Uncertain
46	12	First	Left-hand side	Left-hand side	TRUE	Uncertain	Left-hand side	TRUE	Uncertain
47	12	First	Left-hand side	Left-hand side	TRUE	Certain	Left-hand side	TRUE	Certain
48	12	First	Right-hand side	Right-hand side	TRUE	Certain	Right-hand side	TRUE	Certain
49	12	First	Left-hand side	Right-hand side	FALSE	Uncertain	Right-hand side	FALSE	Uncertain
50	12	First	Right-hand side	Right-hand side	TRUE	Certain	Right-hand side	TRUE	Certain
51	12	First	Right-hand side	Right-hand side	TRUE	Certain	Right-hand side	TRUE	Uncertain
52	12	First	Left-hand side	Right-hand side	FALSE	Certain	Left-hand side	TRUE	Uncertain
53	12	First	Right-hand side	Right-hand side	TRUE	Certain	Right-hand side	TRUE	Uncertain
54	12	First	Right-hand side	Right-hand side	TRUE	Certain	Right-hand side	TRUE	Certain
55	12	First	Right-hand side	Right-hand side	TRUE	Certain	Right-hand side	TRUE	Certain
56	12	First	Right-hand side	Right-hand side	TRUE	Certain	Right-hand side	TRUE	Certain
57	12	First	Left-hand side	Right-hand side	FALSE	Uncertain	Left-hand side	TRUE	Uncertain
58	12	First	Left-hand side	Left-hand side	TRUE	Uncertain	Right-hand side	FALSE	Uncertain
59	12	First	Right-hand side	Right-hand side	TRUE	Certain	Right-hand side	TRUE	Uncertain
60	12	First	Right-hand side	Right-hand side	TRUE	Certain	Right-hand side	TRUE	Certain
1	13	First	Left-hand side	Left-hand side	TRUE	Certain	Right-hand side	FALSE	Certain
2	13	First	Left-hand side	Left-hand side	TRUE	Uncertain	Left-hand side	TRUE	Certain
3	13	First	Left-hand side	Right-hand side	FALSE	Uncertain	Right-hand side	FALSE	Uncertain
4	13	First	Right-hand side	Right-hand side	TRUE	Uncertain	Right-hand side	TRUE	Certain
5	13	First	Left-hand side	Right-hand side	FALSE	Certain	Left-hand side	TRUE	Certain
6	13	First	Right-hand side	Right-hand side	TRUE	Certain	Right-hand side	TRUE	Certain
7	13	First	Left-hand side	Right-hand side	FALSE	Certain	Left-hand side	TRUE	Certain
8	13	First	Right-hand side	Right-hand side	TRUE	Certain	Right-hand side	TRUE	Certain
9	13	First	Right-hand side	Left-hand side	FALSE	Certain	Right-hand side	TRUE	Certain
10	13	First	Right-hand side	Right-hand side	TRUE	Certain	Right-hand side	TRUE	Certain
11	13	First	Right-hand side	Right-hand side	TRUE	Uncertain	Right-hand side	TRUE	Certain
12	13	First	Left-hand side	Right-hand side	FALSE	Certain	Right-hand side	FALSE	Uncertain
13	13	First	Left-hand side	Right-hand side	FALSE	Certain	Left-hand side	TRUE	Certain
14	13	First	Left-hand side	Left-hand side	TRUE	Certain	Left-hand side	TRUE	Certain
15	13	First	Right-hand side	Right-hand side	TRUE	Certain	Right-hand side	TRUE	Certain
16	13	First	Right-hand side	Right-hand side	TRUE	Certain	Right-hand side	TRUE	Certain
17	13	First	Right-hand side	Right-hand side	TRUE	Uncertain	Left-hand side	FALSE	Certain
18	13	First	Right-hand side	Right-hand side	TRUE	Certain	Right-hand side	TRUE	Certain
19	13	First	Right-hand side	Right-hand side	TRUE	Certain	Right-hand side	TRUE	Certain
20	13	First	Left-hand side	Left-hand side	TRUE	Certain	Right-hand side	FALSE	Certain
21	13	First	Right-hand side	Left-hand side	FALSE	Certain	Right-hand side	TRUE	Certain
22	13	First	Left-hand side	Left-hand side	TRUE	Certain	Left-hand side	TRUE	Certain
23	13	First	Right-hand side	Right-hand side	TRUE	Uncertain	Left-hand side	FALSE	Certain
24	13	First	Right-hand side	Right-hand side	TRUE	Certain	Right-hand side	TRUE	Certain
25	13	First	Left-hand side	Left-hand side	TRUE	Certain	Right-hand side	FALSE	Certain
26	13	First	Right-hand side	Right-hand side	TRUE	Certain	Right-hand side	TRUE	Certain
27	13	First	Right-hand side	Left-hand side	FALSE	Uncertain	Right-hand side	TRUE	Certain
28	13	First	Right-hand side	Right-hand side	TRUE	Uncertain	Right-hand side	TRUE	Certain
29	13	First	Left-hand side	Left-hand side	TRUE	Uncertain	Right-hand side	FALSE	Certain
30	13	First	Left-hand side	Left-hand side	TRUE	Certain	Right-hand side	FALSE	Certain
31	13	First	Right-hand side	Right-hand side	TRUE	Certain	Left-hand side	FALSE	Certain
32	13	First	Right-hand side	Right-hand side	TRUE	Certain	Right-hand side	TRUE	Certain
33	13	First	Left-hand side	Left-hand side	TRUE	Certain	Right-hand side	FALSE	Certain
34	13	First	Right-hand side	Right-hand side	TRUE	Certain	Right-hand side	TRUE	Certain
35	13	First	Right-hand side	Right-hand side	TRUE	Certain	Left-hand side	FALSE	Certain
36	13	First	Right-hand side	Right-hand side	TRUE	Certain	Right-hand side	TRUE	NA
37	13	First	Left-hand side	Left-hand side	TRUE	Certain	Left-hand side	TRUE	Certain
38	13	First	Left-hand side	Left-hand side	TRUE	Uncertain	Right-hand side	FALSE	Certain
39	13	First	Left-hand side	Left-hand side	TRUE	Certain	Right-hand side	FALSE	Certain
40	13	First	Left-hand side	Left-hand side	TRUE	Certain	Left-hand side	TRUE	Certain
41	13	First	Right-hand side	Right-hand side	TRUE	Certain	Right-hand side	TRUE	Certain
42	13	First	Left-hand side	Right-hand side	FALSE	Uncertain	Left-hand side	TRUE	Certain
43	13	First	Right-hand side	Right-hand side	TRUE	Certain	Right-hand side	TRUE	Certain
44	13	First	Left-hand side	Left-hand side	TRUE	Certain	Right-hand side	FALSE	Uncertain
45	13	First	Right-hand side	Right-hand side	TRUE	Certain	Right-hand side	TRUE	Certain
46	13	First	Right-hand side	Right-hand side	TRUE	Certain	Right-hand side	TRUE	Certain
47	13	First	Left-hand side	Right-hand side	FALSE	Uncertain	Right-hand side	FALSE	Certain
48	13	First	Left-hand side	Left-hand side	TRUE	Uncertain	Right-hand side	FALSE	Certain
49	13	First	Left-hand side	Left-hand side	TRUE	Certain	Right-hand side	FALSE	Certain
50	13	First	Left-hand side	Right-hand side	FALSE	Uncertain	Right-hand side	FALSE	Certain
51	13	First	Right-hand side	Right-hand side	TRUE	Certain	Right-hand side	TRUE	Certain
52	13	First	Right-hand side	Right-hand side	TRUE	Certain	Right-hand side	TRUE	Certain
53	13	First	Right-hand side	Right-hand side	TRUE	Certain	Right-hand side	TRUE	Certain
54	13	First	Right-hand side	Right-hand side	TRUE	Certain	Left-hand side	FALSE	Certain
55	13	First	Left-hand side	Left-hand side	TRUE	Certain	Left-hand side	TRUE	Certain
56	13	First	Right-hand side	Right-hand side	TRUE	Uncertain	Left-hand side	FALSE	Certain
57	13	First	Left-hand side	Left-hand side	TRUE	Uncertain	Right-hand side	FALSE	Certain
58	13	First	Left-hand side	Left-hand side	TRUE	Uncertain	Right-hand side	FALSE	Certain
59	13	First	Left-hand side	Left-hand side	TRUE	Certain	Right-hand side	FALSE	Certain
60	13	First	Left-hand side	Left-hand side	TRUE	Certain	Left-hand side	TRUE	Certain
1	14	First	Left-hand side	Left-hand side	TRUE	Certain	Left-hand side	TRUE	Certain
2	14	First	Right-hand side	Right-hand side	TRUE	Certain	Right-hand side	TRUE	Certain
3	14	First	Right-hand side	Right-hand side	TRUE	Uncertain	Right-hand side	TRUE	Uncertain
4	14	First	Left-hand side	Left-hand side	TRUE	Certain	Left-hand side	TRUE	Certain
5	14	First	Right-hand side	Left-hand side	FALSE	Certain	Right-hand side	TRUE	Uncertain
6	14	First	Left-hand side	Left-hand side	TRUE	Certain	Left-hand side	TRUE	Certain
7	14	First	Right-hand side	Right-hand side	TRUE	Uncertain	Right-hand side	TRUE	Certain
8	14	First	Right-hand side	Right-hand side	TRUE	Certain	Left-hand side	FALSE	Certain
9	14	First	Left-hand side	Left-hand side	TRUE	Certain	Left-hand side	TRUE	Certain
10	14	First	Left-hand side	Left-hand side	TRUE	Certain	NA	FALSE	NA
11	14	First	Right-hand side	Right-hand side	TRUE	Uncertain	Left-hand side	FALSE	Certain
12	14	First	Left-hand side	Left-hand side	TRUE	Certain	Right-hand side	FALSE	Uncertain
13	14	First	Left-hand side	Left-hand side	TRUE	Certain	Left-hand side	TRUE	Certain
14	14	First	Right-hand side	Right-hand side	TRUE	Uncertain	Left-hand side	FALSE	Certain
15	14	First	Right-hand side	Right-hand side	TRUE	Uncertain	Left-hand side	FALSE	Uncertain
16	14	First	Right-hand side	Right-hand side	TRUE	Certain	Left-hand side	FALSE	Certain
17	14	First	Left-hand side	Left-hand side	TRUE	Certain	Left-hand side	TRUE	Certain
18	14	First	Left-hand side	Right-hand side	FALSE	Uncertain	Left-hand side	TRUE	Certain
19	14	First	Right-hand side	Left-hand side	FALSE	Uncertain	Left-hand side	FALSE	Certain
20	14	First	Left-hand side	Left-hand side	TRUE	Uncertain	Right-hand side	FALSE	Certain
21	14	First	Left-hand side	Left-hand side	TRUE	Certain	Left-hand side	TRUE	Certain
22	14	First	Right-hand side	Right-hand side	TRUE	Certain	Left-hand side	FALSE	Certain
23	14	First	Left-hand side	Right-hand side	FALSE	Uncertain	Left-hand side	TRUE	Uncertain
24	14	First	Right-hand side	Left-hand side	FALSE	Certain	Left-hand side	FALSE	Uncertain
25	14	First	Left-hand side	Left-hand side	TRUE	Certain	Right-hand side	FALSE	Uncertain
26	14	First	Left-hand side	Left-hand side	TRUE	Certain	Left-hand side	TRUE	Certain
27	14	First	Right-hand side	Left-hand side	FALSE	Certain	Left-hand side	FALSE	Certain
28	14	First	Right-hand side	Left-hand side	FALSE	Certain	Right-hand side	TRUE	Uncertain
29	14	First	Right-hand side	Right-hand side	TRUE	Uncertain	Right-hand side	TRUE	Certain
30	14	First	Left-hand side	Left-hand side	TRUE	Certain	Right-hand side	FALSE	Uncertain
31	14	First	Left-hand side	Left-hand side	TRUE	Certain	Left-hand side	TRUE	Certain
32	14	First	Left-hand side	Left-hand side	TRUE	Certain	Left-hand side	TRUE	Certain
33	14	First	Left-hand side	Left-hand side	TRUE	Certain	Left-hand side	TRUE	Certain
34	14	First	Right-hand side	Right-hand side	TRUE	Uncertain	Left-hand side	FALSE	Certain
35	14	First	Right-hand side	Right-hand side	TRUE	Uncertain	Right-hand side	TRUE	Uncertain
36	14	First	Left-hand side	Left-hand side	TRUE	Certain	Left-hand side	TRUE	Uncertain
37	14	First	Right-hand side	Left-hand side	FALSE	Uncertain	Left-hand side	FALSE	Certain
38	14	First	Left-hand side	Left-hand side	TRUE	Certain	Left-hand side	TRUE	Uncertain
39	14	First	Left-hand side	Left-hand side	TRUE	Certain	Left-hand side	TRUE	Certain
40	14	First	Right-hand side	Left-hand side	FALSE	Uncertain	Left-hand side	FALSE	Certain
41	14	First	Left-hand side	Left-hand side	TRUE	Certain	Left-hand side	TRUE	Uncertain
42	14	First	Left-hand side	Right-hand side	FALSE	Certain	Left-hand side	TRUE	Uncertain
43	14	First	Right-hand side	Right-hand side	TRUE	Certain	Left-hand side	FALSE	Certain
44	14	First	Right-hand side	Right-hand side	TRUE	Uncertain	Right-hand side	TRUE	Uncertain
45	14	First	Left-hand side	Left-hand side	TRUE	Uncertain	Right-hand side	FALSE	Certain
46	14	First	Right-hand side	Left-hand side	FALSE	Certain	Left-hand side	FALSE	Certain
47	14	First	Right-hand side	Left-hand side	FALSE	Certain	Right-hand side	TRUE	Certain
48	14	First	Left-hand side	Right-hand side	FALSE	Certain	Right-hand side	FALSE	Certain
49	14	First	Right-hand side	Right-hand side	TRUE	Uncertain	Left-hand side	FALSE	Certain
50	14	First	Left-hand side	Left-hand side	TRUE	Uncertain	Right-hand side	FALSE	Certain
51	14	First	Right-hand side	Left-hand side	FALSE	Certain	Left-hand side	FALSE	Certain
52	14	First	Right-hand side	Right-hand side	TRUE	Certain	Right-hand side	TRUE	Certain
53	14	First	Left-hand side	Left-hand side	TRUE	Certain	Right-hand side	FALSE	Uncertain
54	14	First	Left-hand side	Left-hand side	TRUE	Certain	Left-hand side	TRUE	Certain
55	14	First	Right-hand side	Right-hand side	TRUE	Uncertain	Left-hand side	FALSE	Certain
56	14	First	Right-hand side	Left-hand side	FALSE	Certain	Right-hand side	TRUE	Uncertain
57	14	First	Left-hand side	Left-hand side	TRUE	Certain	Right-hand side	FALSE	Certain
58	14	First	Right-hand side	Right-hand side	TRUE	Uncertain	Left-hand side	FALSE	Certain
59	14	First	Right-hand side	Left-hand side	FALSE	Certain	Right-hand side	TRUE	Certain
60	14	First	Left-hand side	Right-hand side	FALSE	Certain	Right-hand side	FALSE	Certain
1	15	First	Right-hand side	Left-hand side	FALSE	Uncertain	Right-hand side	TRUE	Uncertain
2	15	First	Right-hand side	Left-hand side	FALSE	Certain	Left-hand side	FALSE	Uncertain
3	15	First	Left-hand side	Right-hand side	FALSE	Certain	Right-hand side	FALSE	Certain
4	15	First	Left-hand side	Left-hand side	TRUE	Certain	Left-hand side	TRUE	Certain
5	15	First	Right-hand side	Right-hand side	TRUE	Certain	Right-hand side	TRUE	Certain
6	15	First	Left-hand side	Left-hand side	TRUE	Certain	Left-hand side	TRUE	Uncertain
7	15	First	Right-hand side	Right-hand side	TRUE	Certain	Right-hand side	TRUE	Certain
8	15	First	Left-hand side	Left-hand side	TRUE	Certain	Left-hand side	TRUE	Uncertain
9	15	First	Left-hand side	Right-hand side	FALSE	Uncertain	Right-hand side	FALSE	Certain
10	15	First	Right-hand side	Left-hand side	FALSE	Uncertain	Left-hand side	FALSE	Uncertain
11	15	First	Left-hand side	Left-hand side	TRUE	Certain	Right-hand side	FALSE	Certain
12	15	First	Left-hand side	Left-hand side	TRUE	Certain	Left-hand side	TRUE	Uncertain
13	15	First	Right-hand side	Right-hand side	TRUE	Certain	Right-hand side	TRUE	Uncertain
14	15	First	Right-hand side	Right-hand side	TRUE	Certain	Left-hand side	FALSE	Certain
15	15	First	Right-hand side	Right-hand side	TRUE	Certain	Right-hand side	TRUE	Uncertain
16	15	First	Right-hand side	Right-hand side	TRUE	Uncertain	Left-hand side	FALSE	Certain
17	15	First	Left-hand side	Left-hand side	TRUE	Certain	Right-hand side	FALSE	Uncertain
18	15	First	Right-hand side	Right-hand side	TRUE	Certain	Left-hand side	FALSE	Certain
19	15	First	Right-hand side	Right-hand side	TRUE	Certain	Right-hand side	TRUE	Uncertain
20	15	First	Left-hand side	Left-hand side	TRUE	Certain	Left-hand side	TRUE	Certain
21	15	First	Right-hand side	Right-hand side	TRUE	Certain	Right-hand side	TRUE	Uncertain
22	15	First	Right-hand side	Left-hand side	FALSE	Uncertain	Right-hand side	TRUE	Certain
23	15	First	Left-hand side	Right-hand side	FALSE	Certain	Left-hand side	TRUE	Uncertain
24	15	First	Right-hand side	Right-hand side	TRUE	Certain	Right-hand side	TRUE	Certain
25	15	First	Left-hand side	Left-hand side	TRUE	Certain	Left-hand side	TRUE	Uncertain
26	15	First	Right-hand side	Right-hand side	TRUE	Certain	Right-hand side	TRUE	Certain
27	15	First	Left-hand side	Left-hand side	TRUE	Certain	Left-hand side	TRUE	Uncertain
28	15	First	Right-hand side	Left-hand side	FALSE	Uncertain	Right-hand side	TRUE	Certain
29	15	First	Left-hand side	Right-hand side	FALSE	Certain	Left-hand side	TRUE	Uncertain
30	15	First	Right-hand side	Right-hand side	TRUE	Uncertain	Right-hand side	TRUE	Certain
31	15	First	Right-hand side	Right-hand side	TRUE	Certain	Left-hand side	FALSE	Uncertain
32	15	First	Left-hand side	Left-hand side	TRUE	Certain	Right-hand side	FALSE	Uncertain
33	15	First	Left-hand side	Left-hand side	TRUE	Certain	Left-hand side	TRUE	Certain
34	15	First	Right-hand side	Right-hand side	TRUE	Certain	Right-hand side	TRUE	Uncertain
35	15	First	Left-hand side	Right-hand side	FALSE	Certain	Left-hand side	TRUE	Uncertain
36	15	First	Right-hand side	Left-hand side	FALSE	Certain	Right-hand side	TRUE	Certain
37	15	First	Left-hand side	Left-hand side	TRUE	Certain	Left-hand side	TRUE	Uncertain
38	15	First	Right-hand side	Right-hand side	TRUE	Certain	Right-hand side	TRUE	Certain
39	15	First	Left-hand side	Right-hand side	FALSE	Uncertain	Right-hand side	FALSE	Uncertain
40	15	First	Left-hand side	Left-hand side	TRUE	Certain	Right-hand side	FALSE	Certain
41	15	First	Left-hand side	Left-hand side	TRUE	Certain	Left-hand side	TRUE	Uncertain
42	15	First	Left-hand side	Left-hand side	TRUE	Certain	Left-hand side	TRUE	Certain
43	15	First	Left-hand side	Right-hand side	FALSE	Uncertain	Left-hand side	TRUE	Certain
44	15	First	Left-hand side	Left-hand side	TRUE	Certain	Right-hand side	FALSE	Certain
45	15	First	Left-hand side	Right-hand side	FALSE	Certain	Left-hand side	TRUE	Uncertain
46	15	First	Right-hand side	Right-hand side	TRUE	Certain	Right-hand side	TRUE	Certain
47	15	First	Right-hand side	Right-hand side	TRUE	Certain	Left-hand side	FALSE	Certain
48	15	First	Right-hand side	Right-hand side	TRUE	Uncertain	Right-hand side	TRUE	Certain
49	15	First	Right-hand side	Right-hand side	TRUE	Certain	Left-hand side	FALSE	Uncertain
50	15	First	Left-hand side	Left-hand side	TRUE	Certain	Right-hand side	FALSE	Certain
51	15	First	Left-hand side	Right-hand side	FALSE	Certain	Left-hand side	TRUE	Uncertain
52	15	First	Right-hand side	Right-hand side	TRUE	Uncertain	Right-hand side	TRUE	Certain
53	15	First	Right-hand side	Right-hand side	TRUE	Certain	Left-hand side	FALSE	Uncertain
54	15	First	Right-hand side	Right-hand side	TRUE	Certain	Right-hand side	TRUE	Certain
55	15	First	Right-hand side	Right-hand side	TRUE	Certain	Left-hand side	FALSE	Uncertain
56	15	First	Left-hand side	Right-hand side	FALSE	Certain	Right-hand side	FALSE	Certain
57	15	First	Right-hand side	Right-hand side	TRUE	Certain	Left-hand side	FALSE	Uncertain
58	15	First	Right-hand side	Left-hand side	FALSE	Certain	Left-hand side	FALSE	Certain
59	15	First	Left-hand side	Left-hand side	TRUE	Uncertain	Left-hand side	TRUE	Certain
60	15	First	Left-hand side	Right-hand side	FALSE	Uncertain	Left-hand side	TRUE	Uncertain
1	16	First	Left-hand side	Left-hand side	TRUE	Certain	Left-hand side	TRUE	Uncertain
2	16	First	Right-hand side	Left-hand side	FALSE	Uncertain	Left-hand side	FALSE	Uncertain
3	16	First	Right-hand side	Right-hand side	TRUE	Certain	Right-hand side	TRUE	Uncertain
4	16	First	Right-hand side	Right-hand side	TRUE	Certain	Right-hand side	TRUE	Certain
5	16	First	Left-hand side	Right-hand side	FALSE	Uncertain	Right-hand side	FALSE	Certain
6	16	First	Left-hand side	Right-hand side	FALSE	Uncertain	Left-hand side	TRUE	Uncertain
7	16	First	Right-hand side	Right-hand side	TRUE	Certain	Right-hand side	TRUE	Certain
8	16	First	Left-hand side	Right-hand side	FALSE	Uncertain	Right-hand side	FALSE	Certain
9	16	First	Right-hand side	Right-hand side	TRUE	Uncertain	Left-hand side	FALSE	Uncertain
10	16	First	Right-hand side	Right-hand side	TRUE	Certain	Right-hand side	TRUE	Uncertain
11	16	First	Left-hand side	Right-hand side	FALSE	Uncertain	Left-hand side	TRUE	Uncertain
12	16	First	Left-hand side	Right-hand side	FALSE	Uncertain	Right-hand side	FALSE	Certain
13	16	First	Left-hand side	Left-hand side	TRUE	Certain	Left-hand side	TRUE	Uncertain
14	16	First	Right-hand side	Left-hand side	FALSE	Uncertain	Left-hand side	FALSE	Certain
15	16	First	Right-hand side	Left-hand side	FALSE	Uncertain	Right-hand side	TRUE	Certain
16	16	First	Left-hand side	Right-hand side	FALSE	Uncertain	Left-hand side	TRUE	Certain
17	16	First	Right-hand side	Right-hand side	TRUE	Uncertain	Right-hand side	TRUE	Certain
18	16	First	Right-hand side	Left-hand side	FALSE	Uncertain	Left-hand side	FALSE	Certain
19	16	First	Left-hand side	Left-hand side	TRUE	Certain	Right-hand side	FALSE	Uncertain
20	16	First	Left-hand side	Right-hand side	FALSE	Certain	Left-hand side	TRUE	Certain
21	16	First	Right-hand side	Right-hand side	TRUE	Certain	Left-hand side	FALSE	Certain
22	16	First	Left-hand side	Right-hand side	FALSE	Certain	Right-hand side	FALSE	Certain
23	16	First	Right-hand side	Right-hand side	TRUE	Uncertain	Right-hand side	TRUE	Certain
24	16	First	Left-hand side	Left-hand side	TRUE	Certain	Right-hand side	FALSE	Certain
25	16	First	Left-hand side	Left-hand side	TRUE	Certain	Right-hand side	FALSE	Certain
26	16	First	Left-hand side	Right-hand side	FALSE	Certain	Left-hand side	TRUE	Certain
27	16	First	Right-hand side	Right-hand side	TRUE	Certain	Right-hand side	TRUE	Certain
28	16	First	Left-hand side	Left-hand side	TRUE	Uncertain	Right-hand side	FALSE	Certain
29	16	First	Left-hand side	Left-hand side	TRUE	Certain	Left-hand side	TRUE	Uncertain
30	16	First	Left-hand side	Right-hand side	FALSE	Uncertain	Left-hand side	TRUE	Uncertain
31	16	First	Left-hand side	Left-hand side	TRUE	Uncertain	Left-hand side	TRUE	Certain
32	16	First	Left-hand side	Left-hand side	TRUE	Uncertain	Left-hand side	TRUE	Certain
33	16	First	Right-hand side	Right-hand side	TRUE	Certain	Left-hand side	FALSE	Certain
34	16	First	Right-hand side	Right-hand side	TRUE	Certain	Right-hand side	TRUE	Uncertain
35	16	First	Right-hand side	Right-hand side	TRUE	Certain	Right-hand side	TRUE	Certain
36	16	First	Right-hand side	Right-hand side	TRUE	Uncertain	Left-hand side	FALSE	Certain
37	16	First	Left-hand side	Left-hand side	TRUE	Certain	Left-hand side	TRUE	NA
38	16	First	Left-hand side	Left-hand side	TRUE	Certain	Left-hand side	TRUE	Uncertain
39	16	First	Right-hand side	Left-hand side	FALSE	Certain	Right-hand side	TRUE	NA
40	16	First	Left-hand side	Left-hand side	TRUE	Certain	Left-hand side	TRUE	Certain
41	16	First	Left-hand side	Right-hand side	FALSE	Uncertain	Left-hand side	TRUE	Certain
42	16	First	Right-hand side	Right-hand side	TRUE	Uncertain	Left-hand side	FALSE	Certain
43	16	First	Right-hand side	Right-hand side	TRUE	Uncertain	Left-hand side	FALSE	Uncertain
44	16	First	Right-hand side	Left-hand side	FALSE	Uncertain	Right-hand side	TRUE	Uncertain
45	16	First	Right-hand side	Right-hand side	TRUE	Certain	Right-hand side	TRUE	Uncertain
46	16	First	Right-hand side	Right-hand side	TRUE	Certain	Right-hand side	TRUE	Certain
47	16	First	Right-hand side	Right-hand side	TRUE	Certain	Right-hand side	TRUE	Certain
48	16	First	Right-hand side	Right-hand side	TRUE	Certain	Right-hand side	TRUE	Certain
49	16	First	Right-hand side	Right-hand side	TRUE	Certain	Right-hand side	TRUE	Certain
50	16	First	Right-hand side	Right-hand side	TRUE	Certain	Right-hand side	TRUE	Certain
51	16	First	Right-hand side	Right-hand side	TRUE	Certain	Right-hand side	TRUE	Uncertain
52	16	First	Left-hand side	Right-hand side	FALSE	Uncertain	Left-hand side	TRUE	Uncertain
53	16	First	Right-hand side	Right-hand side	TRUE	Certain	Right-hand side	TRUE	Certain
54	16	First	Right-hand side	Right-hand side	TRUE	Uncertain	Left-hand side	FALSE	Certain
55	16	First	Left-hand side	Right-hand side	FALSE	Certain	Left-hand side	TRUE	Certain
56	16	First	Right-hand side	Right-hand side	TRUE	Uncertain	Right-hand side	TRUE	Uncertain
57	16	First	Right-hand side	Right-hand side	TRUE	Certain	Left-hand side	FALSE	Certain
58	16	First	Right-hand side	Right-hand side	TRUE	Uncertain	Left-hand side	FALSE	Uncertain
59	16	First	Left-hand side	Right-hand side	FALSE	Certain	Left-hand side	TRUE	Uncertain
60	16	First	Right-hand side	Right-hand side	TRUE	Uncertain	Left-hand side	FALSE	Certain
1	17	First	Right-hand side	Right-hand side	TRUE	Certain	Right-hand side	TRUE	Uncertain
2	17	First	Right-hand side	Left-hand side	FALSE	Certain	Right-hand side	TRUE	Certain
3	17	First	Left-hand side	Left-hand side	TRUE	Certain	Left-hand side	TRUE	Certain
4	17	First	Left-hand side	Left-hand side	TRUE	Uncertain	Right-hand side	FALSE	Certain
5	17	First	Left-hand side	Right-hand side	FALSE	Certain	Left-hand side	TRUE	Uncertain
6	17	First	Right-hand side	Right-hand side	TRUE	Certain	Right-hand side	TRUE	Certain
7	17	First	Left-hand side	Right-hand side	FALSE	Certain	Left-hand side	TRUE	Certain
8	17	First	Right-hand side	Right-hand side	TRUE	Certain	Right-hand side	TRUE	Certain
9	17	First	Left-hand side	Left-hand side	TRUE	Certain	Left-hand side	TRUE	Certain
10	17	First	Right-hand side	Right-hand side	TRUE	Certain	Right-hand side	TRUE	Certain
11	17	First	Right-hand side	Right-hand side	TRUE	Certain	Right-hand side	TRUE	Certain
12	17	First	Left-hand side	Left-hand side	TRUE	Certain	Left-hand side	TRUE	Certain
13	17	First	Left-hand side	Left-hand side	TRUE	Certain	Right-hand side	FALSE	Certain
14	17	First	Left-hand side	Left-hand side	TRUE	Certain	Right-hand side	FALSE	Certain
15	17	First	Left-hand side	Right-hand side	FALSE	Certain	Right-hand side	FALSE	Uncertain
16	17	First	Right-hand side	Right-hand side	TRUE	Certain	Right-hand side	TRUE	Uncertain
17	17	First	Right-hand side	Right-hand side	TRUE	Certain	Right-hand side	TRUE	Certain
18	17	First	Right-hand side	Right-hand side	TRUE	Certain	Right-hand side	TRUE	Certain
19	17	First	Left-hand side	Left-hand side	TRUE	Certain	Right-hand side	FALSE	Certain
20	17	First	Right-hand side	Right-hand side	TRUE	Certain	Right-hand side	TRUE	Certain
21	17	First	Left-hand side	Left-hand side	TRUE	Certain	Left-hand side	TRUE	Certain
22	17	First	Right-hand side	Right-hand side	TRUE	Certain	Right-hand side	TRUE	Certain
23	17	First	Right-hand side	Right-hand side	TRUE	Uncertain	Left-hand side	FALSE	Certain
24	17	First	Left-hand side	Right-hand side	FALSE	Certain	Right-hand side	FALSE	Certain
25	17	First	Left-hand side	Left-hand side	TRUE	Uncertain	Right-hand side	FALSE	Certain
26	17	First	Right-hand side	Right-hand side	TRUE	Certain	Right-hand side	TRUE	Certain
27	17	First	Left-hand side	Left-hand side	TRUE	Certain	Left-hand side	TRUE	Uncertain
28	17	First	Right-hand side	Right-hand side	TRUE	Certain	Right-hand side	TRUE	Uncertain
29	17	First	Right-hand side	Right-hand side	TRUE	Certain	Right-hand side	TRUE	Certain
30	17	First	Left-hand side	Right-hand side	FALSE	Certain	Left-hand side	TRUE	Certain
31	17	First	Left-hand side	Left-hand side	TRUE	Certain	Left-hand side	TRUE	Certain
32	17	First	Right-hand side	Right-hand side	TRUE	Certain	Right-hand side	TRUE	Certain
33	17	First	Left-hand side	Left-hand side	TRUE	Certain	Left-hand side	TRUE	Uncertain
34	17	First	Left-hand side	Left-hand side	TRUE	Uncertain	Left-hand side	TRUE	Certain
35	17	First	Left-hand side	Left-hand side	TRUE	Certain	Left-hand side	TRUE	Uncertain
36	17	First	Left-hand side	Right-hand side	FALSE	Certain	Left-hand side	TRUE	Certain
37	17	First	Left-hand side	Left-hand side	TRUE	Certain	Right-hand side	FALSE	Uncertain
38	17	First	Right-hand side	Right-hand side	TRUE	Certain	Right-hand side	TRUE	Uncertain
39	17	First	Left-hand side	Left-hand side	TRUE	Certain	Left-hand side	TRUE	Certain
40	17	First	Left-hand side	Right-hand side	FALSE	Uncertain	Left-hand side	TRUE	Certain
41	17	First	Right-hand side	Left-hand side	FALSE	Uncertain	Right-hand side	TRUE	Certain
42	17	First	Right-hand side	Right-hand side	TRUE	Certain	Right-hand side	TRUE	Certain
43	17	First	Left-hand side	Left-hand side	TRUE	Certain	Left-hand side	TRUE	Uncertain
44	17	First	Left-hand side	Right-hand side	FALSE	Certain	Right-hand side	FALSE	Uncertain
45	17	First	Left-hand side	Left-hand side	TRUE	Certain	Left-hand side	TRUE	Certain
46	17	First	Right-hand side	Right-hand side	TRUE	Certain	Right-hand side	TRUE	Certain
47	17	First	Left-hand side	Left-hand side	TRUE	Certain	Left-hand side	TRUE	Uncertain
48	17	First	Left-hand side	Right-hand side	FALSE	Certain	Right-hand side	FALSE	Certain
49	17	First	Right-hand side	Left-hand side	FALSE	Uncertain	Left-hand side	FALSE	Certain
50	17	First	Left-hand side	Right-hand side	FALSE	Certain	Right-hand side	FALSE	Certain
51	17	First	Right-hand side	Right-hand side	TRUE	Certain	Right-hand side	TRUE	Certain
52	17	First	Right-hand side	Right-hand side	TRUE	Certain	Right-hand side	TRUE	Uncertain
53	17	First	Left-hand side	Left-hand side	TRUE	Certain	Left-hand side	TRUE	Uncertain
54	17	First	Right-hand side	Right-hand side	TRUE	Certain	Right-hand side	TRUE	Uncertain
55	17	First	Right-hand side	Right-hand side	TRUE	Certain	Right-hand side	TRUE	Certain
56	17	First	Right-hand side	Right-hand side	TRUE	Certain	Right-hand side	TRUE	Uncertain
57	17	First	Right-hand side	Right-hand side	TRUE	Certain	Right-hand side	TRUE	Certain
58	17	First	Right-hand side	Right-hand side	TRUE	Certain	Left-hand side	FALSE	Certain
59	17	First	Left-hand side	Left-hand side	TRUE	Certain	Left-hand side	TRUE	Certain
60	17	First	Left-hand side	Right-hand side	FALSE	Certain	Right-hand side	FALSE	Uncertain
1	18	First	Left-hand side	Left-hand side	TRUE	Certain	Right-hand side	FALSE	Certain
2	18	First	Left-hand side	Left-hand side	TRUE	Certain	Left-hand side	TRUE	Certain
3	18	First	Left-hand side	Left-hand side	TRUE	Certain	Right-hand side	FALSE	Certain
4	18	First	Left-hand side	Left-hand side	TRUE	Certain	Left-hand side	TRUE	Certain
5	18	First	Right-hand side	Left-hand side	FALSE	Certain	Left-hand side	FALSE	Certain
6	18	First	Left-hand side	Left-hand side	TRUE	Certain	Left-hand side	TRUE	Certain
7	18	First	Right-hand side	Left-hand side	FALSE	Certain	Right-hand side	TRUE	Certain
8	18	First	Left-hand side	Right-hand side	FALSE	Uncertain	Left-hand side	TRUE	Certain
9	18	First	Left-hand side	Left-hand side	TRUE	Certain	Right-hand side	FALSE	Certain
10	18	First	Right-hand side	Left-hand side	FALSE	Certain	Left-hand side	FALSE	Certain
11	18	First	Left-hand side	Left-hand side	TRUE	Uncertain	Left-hand side	TRUE	Certain
12	18	First	Left-hand side	Left-hand side	TRUE	Certain	Right-hand side	FALSE	Certain
13	18	First	Left-hand side	Right-hand side	FALSE	Uncertain	Left-hand side	TRUE	Certain
14	18	First	Left-hand side	Left-hand side	TRUE	Uncertain	Left-hand side	TRUE	Certain
15	18	First	Right-hand side	Left-hand side	FALSE	Certain	Left-hand side	FALSE	Certain
16	18	First	Right-hand side	Right-hand side	TRUE	Uncertain	Right-hand side	TRUE	Certain
17	18	First	Left-hand side	Right-hand side	FALSE	Uncertain	Left-hand side	TRUE	Certain
18	18	First	Left-hand side	Left-hand side	TRUE	Certain	Left-hand side	TRUE	Certain
19	18	First	Right-hand side	Left-hand side	FALSE	Certain	Right-hand side	TRUE	Certain
20	18	First	Right-hand side	Left-hand side	FALSE	Uncertain	Left-hand side	FALSE	Certain
21	18	First	Right-hand side	Right-hand side	TRUE	Certain	Right-hand side	TRUE	Certain
22	18	First	Left-hand side	Left-hand side	TRUE	Certain	Left-hand side	TRUE	Certain
23	18	First	Right-hand side	Left-hand side	FALSE	Certain	Right-hand side	TRUE	Certain
24	18	First	Right-hand side	Right-hand side	TRUE	Certain	Left-hand side	FALSE	Certain
25	18	First	Right-hand side	Right-hand side	TRUE	Uncertain	Left-hand side	FALSE	Certain
26	18	First	Left-hand side	Right-hand side	FALSE	Uncertain	Left-hand side	TRUE	Certain
27	18	First	Right-hand side	Right-hand side	TRUE	Uncertain	Left-hand side	FALSE	Certain
28	18	First	Right-hand side	Left-hand side	FALSE	Uncertain	Right-hand side	TRUE	Certain
29	18	First	Right-hand side	Right-hand side	TRUE	Uncertain	Right-hand side	TRUE	Certain
30	18	First	Left-hand side	Right-hand side	FALSE	Certain	Left-hand side	TRUE	Certain
31	18	First	Left-hand side	Left-hand side	TRUE	Certain	Left-hand side	TRUE	Certain
32	18	First	Left-hand side	Right-hand side	FALSE	Uncertain	Left-hand side	TRUE	Certain
33	18	First	Left-hand side	Left-hand side	TRUE	Certain	Right-hand side	FALSE	Certain
34	18	First	Left-hand side	Right-hand side	FALSE	Certain	Left-hand side	TRUE	Certain
35	18	First	Right-hand side	Right-hand side	TRUE	Certain	Left-hand side	FALSE	Certain
36	18	First	Right-hand side	Right-hand side	TRUE	Certain	Left-hand side	FALSE	Certain
37	18	First	Left-hand side	Right-hand side	FALSE	Uncertain	Left-hand side	TRUE	Certain
38	18	First	Left-hand side	Right-hand side	FALSE	Uncertain	Left-hand side	TRUE	Certain
39	18	First	Right-hand side	Right-hand side	TRUE	Certain	Right-hand side	TRUE	Certain
40	18	First	Left-hand side	Right-hand side	FALSE	Certain	Left-hand side	TRUE	Certain
41	18	First	Left-hand side	Left-hand side	TRUE	Uncertain	Left-hand side	TRUE	Certain
42	18	First	Right-hand side	Left-hand side	FALSE	Certain	Left-hand side	FALSE	Certain
43	18	First	Left-hand side	Right-hand side	FALSE	Certain	Left-hand side	TRUE	Certain
44	18	First	Right-hand side	Left-hand side	FALSE	Certain	Left-hand side	FALSE	Certain
45	18	First	Right-hand side	Right-hand side	TRUE	Certain	Right-hand side	TRUE	Certain
46	18	First	Left-hand side	Right-hand side	FALSE	Certain	Left-hand side	TRUE	Certain
47	18	First	Right-hand side	Left-hand side	FALSE	Certain	Left-hand side	FALSE	Certain
48	18	First	Left-hand side	Right-hand side	FALSE	Uncertain	Left-hand side	TRUE	Certain
49	18	First	Right-hand side	Left-hand side	FALSE	Certain	Left-hand side	FALSE	Certain
50	18	First	Right-hand side	Right-hand side	TRUE	Uncertain	Left-hand side	FALSE	Certain
51	18	First	Right-hand side	Right-hand side	TRUE	Uncertain	Right-hand side	TRUE	Certain
52	18	First	Left-hand side	Right-hand side	FALSE	Certain	Left-hand side	TRUE	Certain
53	18	First	Left-hand side	Left-hand side	TRUE	Certain	Left-hand side	TRUE	Certain
54	18	First	Right-hand side	Right-hand side	TRUE	Uncertain	Left-hand side	FALSE	Certain
55	18	First	Left-hand side	Right-hand side	FALSE	Certain	Left-hand side	TRUE	Certain
56	18	First	Left-hand side	Left-hand side	TRUE	Uncertain	Left-hand side	TRUE	Certain
57	18	First	Right-hand side	Left-hand side	FALSE	Certain	Left-hand side	FALSE	Certain
58	18	First	Right-hand side	Right-hand side	TRUE	Certain	Left-hand side	FALSE	Certain
59	18	First	Right-hand side	Left-hand side	FALSE	Uncertain	Right-hand side	TRUE	Certain
60	18	First	Right-hand side	Right-hand side	TRUE	Uncertain	Right-hand side	TRUE	Certain
1	19	First	Right-hand side	Left-hand side	FALSE	Certain	Right-hand side	TRUE	Certain
2	19	First	Left-hand side	Left-hand side	TRUE	Uncertain	Right-hand side	FALSE	Certain
3	19	First	Left-hand side	Right-hand side	FALSE	Uncertain	Left-hand side	TRUE	Certain
4	19	First	Right-hand side	Right-hand side	TRUE	Certain	Right-hand side	TRUE	Certain
5	19	First	Right-hand side	Right-hand side	TRUE	Certain	Right-hand side	TRUE	Certain
6	19	First	Left-hand side	Right-hand side	FALSE	Certain	Right-hand side	FALSE	Certain
7	19	First	Left-hand side	Left-hand side	TRUE	Uncertain	Left-hand side	TRUE	Uncertain
8	19	First	Left-hand side	Right-hand side	FALSE	Uncertain	Left-hand side	TRUE	Uncertain
9	19	First	Left-hand side	Left-hand side	TRUE	Uncertain	Left-hand side	TRUE	Certain
10	19	First	Right-hand side	Right-hand side	TRUE	Certain	Right-hand side	TRUE	Certain
11	19	First	Right-hand side	Right-hand side	TRUE	Certain	Right-hand side	TRUE	Uncertain
12	19	First	Left-hand side	Left-hand side	TRUE	Uncertain	Left-hand side	TRUE	Certain
13	19	First	Right-hand side	Left-hand side	FALSE	Uncertain	Right-hand side	TRUE	Certain
14	19	First	Right-hand side	Right-hand side	TRUE	Certain	Right-hand side	TRUE	Certain
15	19	First	Left-hand side	Left-hand side	TRUE	Uncertain	Left-hand side	TRUE	Uncertain
16	19	First	Left-hand side	Right-hand side	FALSE	Certain	Right-hand side	FALSE	Certain
17	19	First	Right-hand side	Right-hand side	TRUE	Certain	Right-hand side	TRUE	Certain
18	19	First	Right-hand side	Right-hand side	TRUE	Certain	Right-hand side	TRUE	Certain
19	19	First	Left-hand side	Left-hand side	TRUE	Certain	Left-hand side	TRUE	Certain
20	19	First	Right-hand side	Right-hand side	TRUE	Certain	Right-hand side	TRUE	Uncertain
21	19	First	Left-hand side	Right-hand side	FALSE	Uncertain	Right-hand side	FALSE	Uncertain
22	19	First	Left-hand side	Left-hand side	TRUE	Certain	Right-hand side	FALSE	Certain
23	19	First	Left-hand side	Right-hand side	FALSE	Certain	Right-hand side	FALSE	Uncertain
24	19	First	Right-hand side	Right-hand side	TRUE	Certain	Right-hand side	TRUE	Certain
25	19	First	Right-hand side	Right-hand side	TRUE	Uncertain	Right-hand side	TRUE	Certain
26	19	First	Right-hand side	Right-hand side	TRUE	Uncertain	Right-hand side	TRUE	Certain
27	19	First	Left-hand side	Right-hand side	FALSE	Uncertain	Right-hand side	FALSE	Certain
28	19	First	Right-hand side	Right-hand side	TRUE	Certain	Right-hand side	TRUE	Certain
29	19	First	Right-hand side	Right-hand side	TRUE	Certain	Right-hand side	TRUE	Certain
30	19	First	Left-hand side	Right-hand side	FALSE	Uncertain	Right-hand side	FALSE	Uncertain
31	19	First	Left-hand side	Left-hand side	TRUE	Uncertain	Right-hand side	FALSE	Certain
32	19	First	Right-hand side	Right-hand side	TRUE	Certain	Right-hand side	TRUE	Certain
33	19	First	Right-hand side	Right-hand side	TRUE	Certain	Right-hand side	TRUE	Certain
34	19	First	Right-hand side	Right-hand side	TRUE	Certain	Right-hand side	TRUE	Certain
35	19	First	Right-hand side	Right-hand side	TRUE	Certain	Right-hand side	TRUE	Certain
36	19	First	Left-hand side	Left-hand side	TRUE	Uncertain	Left-hand side	TRUE	Uncertain
37	19	First	Right-hand side	Right-hand side	TRUE	Uncertain	Right-hand side	TRUE	Certain
38	19	First	Right-hand side	Right-hand side	TRUE	Uncertain	Right-hand side	TRUE	Certain
39	19	First	Right-hand side	Right-hand side	TRUE	Certain	Right-hand side	TRUE	Certain
40	19	First	Right-hand side	Right-hand side	TRUE	Certain	Right-hand side	TRUE	Certain
41	19	First	Left-hand side	Left-hand side	TRUE	Uncertain	Left-hand side	TRUE	Uncertain
42	19	First	Right-hand side	Right-hand side	TRUE	Uncertain	Right-hand side	TRUE	Certain
43	19	First	Left-hand side	Right-hand side	FALSE	Uncertain	Right-hand side	FALSE	Uncertain
44	19	First	Right-hand side	Right-hand side	TRUE	Uncertain	Right-hand side	TRUE	Certain
45	19	First	Right-hand side	Right-hand side	TRUE	Certain	Right-hand side	TRUE	Certain
46	19	First	Left-hand side	Right-hand side	FALSE	Uncertain	Right-hand side	FALSE	Uncertain
47	19	First	Left-hand side	Left-hand side	TRUE	Uncertain	Left-hand side	TRUE	Uncertain
48	19	First	Right-hand side	Right-hand side	TRUE	Certain	Right-hand side	TRUE	Certain
49	19	First	Right-hand side	Right-hand side	TRUE	Uncertain	Right-hand side	TRUE	Uncertain
50	19	First	Left-hand side	Left-hand side	TRUE	Uncertain	Left-hand side	TRUE	Certain
51	19	First	Right-hand side	Right-hand side	TRUE	Certain	Right-hand side	TRUE	Certain
52	19	First	Left-hand side	Left-hand side	TRUE	Uncertain	Left-hand side	TRUE	Uncertain
53	19	First	Left-hand side	Left-hand side	TRUE	Certain	Right-hand side	FALSE	Certain
54	19	First	Left-hand side	Left-hand side	TRUE	Certain	Left-hand side	TRUE	Uncertain
55	19	First	Left-hand side	Left-hand side	TRUE	Uncertain	Left-hand side	TRUE	Uncertain
56	19	First	Left-hand side	Left-hand side	TRUE	Uncertain	Left-hand side	TRUE	Certain
57	19	First	Right-hand side	Left-hand side	FALSE	Uncertain	Right-hand side	TRUE	Certain
58	19	First	Right-hand side	Right-hand side	TRUE	Uncertain	Right-hand side	TRUE	Certain
59	19	First	Left-hand side	Left-hand side	TRUE	Uncertain	Left-hand side	TRUE	Uncertain
60	19	First	Right-hand side	Right-hand side	TRUE	Uncertain	Right-hand side	TRUE	Certain
1	20	First	Right-hand side	Left-hand side	FALSE	Certain	Right-hand side	TRUE	Certain
2	20	First	Left-hand side	Left-hand side	TRUE	Certain	Left-hand side	TRUE	Certain
3	20	First	Right-hand side	Right-hand side	TRUE	Certain	Right-hand side	TRUE	Certain
4	20	First	Left-hand side	Left-hand side	TRUE	Certain	Right-hand side	FALSE	Certain
5	20	First	Left-hand side	Right-hand side	FALSE	Certain	Left-hand side	TRUE	Certain
6	20	First	Right-hand side	Left-hand side	FALSE	Certain	Right-hand side	TRUE	Certain
7	20	First	Left-hand side	Right-hand side	FALSE	Certain	Left-hand side	TRUE	Certain
8	20	First	Right-hand side	Left-hand side	FALSE	Certain	Right-hand side	TRUE	Uncertain
9	20	First	Left-hand side	Left-hand side	TRUE	Uncertain	Right-hand side	FALSE	Certain
10	20	First	Left-hand side	Right-hand side	FALSE	Certain	Right-hand side	FALSE	Certain
11	20	First	Right-hand side	Right-hand side	TRUE	Certain	Right-hand side	TRUE	Certain
12	20	First	Right-hand side	Left-hand side	FALSE	Certain	Right-hand side	TRUE	Uncertain
13	20	First	Left-hand side	Right-hand side	FALSE	Uncertain	Right-hand side	FALSE	Certain
14	20	First	Left-hand side	Left-hand side	TRUE	Uncertain	Right-hand side	FALSE	Uncertain
15	20	First	Left-hand side	Left-hand side	TRUE	Certain	Left-hand side	TRUE	Certain
16	20	First	Right-hand side	Right-hand side	TRUE	Certain	Right-hand side	TRUE	Certain
17	20	First	Right-hand side	Right-hand side	TRUE	Uncertain	Right-hand side	TRUE	Uncertain
18	20	First	Left-hand side	Left-hand side	TRUE	Uncertain	Right-hand side	FALSE	Certain
19	20	First	Right-hand side	Right-hand side	TRUE	Certain	Right-hand side	TRUE	Certain
20	20	First	Left-hand side	Left-hand side	TRUE	Uncertain	Left-hand side	TRUE	Certain
21	20	First	Left-hand side	Left-hand side	TRUE	Uncertain	Right-hand side	FALSE	Certain
22	20	First	Left-hand side	Right-hand side	FALSE	Certain	Right-hand side	FALSE	Certain
23	20	First	Right-hand side	Right-hand side	TRUE	Uncertain	Left-hand side	FALSE	Certain
24	20	First	Left-hand side	Left-hand side	TRUE	Certain	Right-hand side	FALSE	Certain
25	20	First	Left-hand side	Right-hand side	FALSE	Certain	Left-hand side	TRUE	Uncertain
26	20	First	Right-hand side	Right-hand side	TRUE	Certain	Right-hand side	TRUE	Uncertain
27	20	First	Right-hand side	Right-hand side	TRUE	Certain	Right-hand side	TRUE	Certain
28	20	First	Left-hand side	Left-hand side	TRUE	Uncertain	Right-hand side	FALSE	Certain
29	20	First	Left-hand side	Left-hand side	TRUE	Certain	Left-hand side	TRUE	Certain
30	20	First	Left-hand side	Right-hand side	FALSE	Certain	Right-hand side	FALSE	Certain
31	20	First	Left-hand side	Left-hand side	TRUE	Certain	Left-hand side	TRUE	Certain
32	20	First	Left-hand side	Left-hand side	TRUE	Certain	Left-hand side	TRUE	Certain
33	20	First	Left-hand side	Left-hand side	TRUE	Uncertain	Left-hand side	TRUE	Certain
34	20	First	Right-hand side	Right-hand side	TRUE	Uncertain	Right-hand side	TRUE	Uncertain
35	20	First	Left-hand side	Right-hand side	FALSE	Uncertain	Right-hand side	FALSE	Certain
36	20	First	Right-hand side	Right-hand side	TRUE	Uncertain	Left-hand side	FALSE	Certain
37	20	First	Right-hand side	Right-hand side	TRUE	Uncertain	Left-hand side	FALSE	Uncertain
38	20	First	Left-hand side	Right-hand side	FALSE	Certain	Left-hand side	TRUE	Certain
39	20	First	Right-hand side	Right-hand side	TRUE	Certain	Right-hand side	TRUE	Certain
40	20	First	Right-hand side	Right-hand side	TRUE	Certain	Right-hand side	TRUE	Uncertain
41	20	First	Right-hand side	Left-hand side	FALSE	Certain	Right-hand side	TRUE	Uncertain
42	20	First	Left-hand side	Left-hand side	TRUE	Uncertain	Right-hand side	FALSE	Certain
43	20	First	Left-hand side	Right-hand side	FALSE	Certain	Left-hand side	TRUE	Uncertain
44	20	First	Right-hand side	Right-hand side	TRUE	Certain	Right-hand side	TRUE	Uncertain
45	20	First	Left-hand side	Right-hand side	FALSE	Certain	Left-hand side	TRUE	Uncertain
46	20	First	Right-hand side	Right-hand side	TRUE	Certain	Right-hand side	TRUE	Certain
47	20	First	Right-hand side	Right-hand side	TRUE	Certain	Right-hand side	TRUE	Certain
48	20	First	Left-hand side	Left-hand side	TRUE	Certain	Left-hand side	TRUE	Certain
49	20	First	Right-hand side	Right-hand side	TRUE	Certain	Left-hand side	FALSE	Certain
50	20	First	Right-hand side	Right-hand side	TRUE	Certain	Right-hand side	TRUE	Certain
51	20	First	Left-hand side	Right-hand side	FALSE	Certain	Left-hand side	TRUE	Certain
52	20	First	Right-hand side	Right-hand side	TRUE	Certain	Right-hand side	TRUE	Uncertain
53	20	First	Left-hand side	Left-hand side	TRUE	Certain	Right-hand side	FALSE	Certain
54	20	First	Right-hand side	Right-hand side	TRUE	Certain	Right-hand side	TRUE	Uncertain
55	20	First	Right-hand side	Right-hand side	TRUE	Certain	Right-hand side	TRUE	Uncertain
56	20	First	Right-hand side	Right-hand side	TRUE	Uncertain	Left-hand side	FALSE	Certain
57	20	First	Left-hand side	Left-hand side	TRUE	Certain	Right-hand side	FALSE	Certain
58	20	First	Left-hand side	Left-hand side	TRUE	Uncertain	Right-hand side	FALSE	Certain
59	20	First	Right-hand side	Right-hand side	TRUE	Certain	Right-hand side	TRUE	Certain
60	20	First	Left-hand side	Left-hand side	TRUE	Uncertain	Right-hand side	FALSE	Certain
1	21	First	Right-hand side	Right-hand side	TRUE	Certain	Left-hand side	FALSE	Certain
2	21	First	Right-hand side	Right-hand side	TRUE	Certain	Left-hand side	FALSE	Uncertain
3	21	First	Left-hand side	Right-hand side	FALSE	Uncertain	Left-hand side	TRUE	Certain
4	21	First	Right-hand side	Left-hand side	FALSE	Uncertain	Right-hand side	TRUE	Certain
5	21	First	Right-hand side	Right-hand side	TRUE	Certain	Right-hand side	TRUE	Certain
6	21	First	Right-hand side	Right-hand side	TRUE	Certain	Right-hand side	TRUE	Certain
7	21	First	Right-hand side	Right-hand side	TRUE	Certain	Right-hand side	TRUE	Uncertain
8	21	First	Right-hand side	Right-hand side	TRUE	Certain	Right-hand side	TRUE	Uncertain
9	21	First	Left-hand side	Left-hand side	TRUE	Certain	Right-hand side	FALSE	Certain
10	21	First	Left-hand side	Left-hand side	TRUE	Certain	Left-hand side	TRUE	Certain
11	21	First	Right-hand side	Right-hand side	TRUE	Certain	Right-hand side	TRUE	Certain
12	21	First	Left-hand side	Left-hand side	TRUE	Certain	Left-hand side	TRUE	Certain
13	21	First	Right-hand side	Right-hand side	TRUE	Certain	Right-hand side	TRUE	Certain
14	21	First	Left-hand side	Left-hand side	TRUE	Uncertain	Right-hand side	FALSE	Certain
15	21	First	Left-hand side	Left-hand side	TRUE	Certain	Left-hand side	TRUE	Uncertain
16	21	First	Right-hand side	Right-hand side	TRUE	Certain	Right-hand side	TRUE	Certain
17	21	First	Right-hand side	Right-hand side	TRUE	Certain	Right-hand side	TRUE	Certain
18	21	First	Right-hand side	Right-hand side	TRUE	Certain	Left-hand side	FALSE	Certain
19	21	First	Right-hand side	Right-hand side	TRUE	Certain	Right-hand side	TRUE	Certain
20	21	First	Right-hand side	Right-hand side	TRUE	Certain	Left-hand side	FALSE	Uncertain
21	21	First	Right-hand side	Right-hand side	TRUE	Certain	Left-hand side	FALSE	Certain
22	21	First	Left-hand side	Left-hand side	TRUE	Certain	Right-hand side	FALSE	Uncertain
23	21	First	Left-hand side	Left-hand side	TRUE	Certain	Left-hand side	TRUE	Certain
24	21	First	Right-hand side	Right-hand side	TRUE	Certain	Right-hand side	TRUE	Certain
25	21	First	Right-hand side	Right-hand side	TRUE	Certain	Right-hand side	TRUE	Certain
26	21	First	Right-hand side	Right-hand side	TRUE	Certain	Right-hand side	TRUE	Certain
27	21	First	Right-hand side	Left-hand side	FALSE	Uncertain	Left-hand side	FALSE	Uncertain
28	21	First	Right-hand side	Right-hand side	TRUE	Certain	Right-hand side	TRUE	Certain
29	21	First	Right-hand side	Right-hand side	TRUE	Uncertain	Right-hand side	TRUE	Uncertain
30	21	First	Left-hand side	Left-hand side	TRUE	Uncertain	Right-hand side	FALSE	Uncertain
31	21	First	Right-hand side	Right-hand side	TRUE	Certain	Right-hand side	TRUE	Certain
32	21	First	Left-hand side	Right-hand side	FALSE	Certain	Left-hand side	TRUE	Certain
33	21	First	Right-hand side	Right-hand side	TRUE	Certain	Right-hand side	TRUE	Certain
34	21	First	Right-hand side	Right-hand side	TRUE	Certain	Left-hand side	FALSE	Certain
35	21	First	Right-hand side	Right-hand side	TRUE	Certain	Right-hand side	TRUE	Certain
36	21	First	Left-hand side	Left-hand side	TRUE	Certain	Left-hand side	TRUE	Uncertain
37	21	First	Left-hand side	Left-hand side	TRUE	Certain	Left-hand side	TRUE	NA
38	21	First	Right-hand side	Right-hand side	TRUE	Certain	Left-hand side	FALSE	Uncertain
39	21	First	Left-hand side	Left-hand side	TRUE	Certain	Left-hand side	TRUE	Certain
40	21	First	Right-hand side	Right-hand side	TRUE	Certain	Right-hand side	TRUE	Uncertain
41	21	First	Left-hand side	Left-hand side	TRUE	Certain	Left-hand side	TRUE	Certain
42	21	First	Left-hand side	Left-hand side	TRUE	Certain	Left-hand side	TRUE	Uncertain
43	21	First	Left-hand side	Left-hand side	TRUE	Certain	Right-hand side	FALSE	Uncertain
44	21	First	Right-hand side	Right-hand side	TRUE	Certain	Right-hand side	TRUE	Certain
45	21	First	Right-hand side	Right-hand side	TRUE	Certain	Right-hand side	TRUE	Uncertain
46	21	First	Left-hand side	Right-hand side	FALSE	Uncertain	Left-hand side	TRUE	Certain
47	21	First	Right-hand side	Left-hand side	FALSE	Certain	Right-hand side	TRUE	Certain
48	21	First	Left-hand side	Left-hand side	TRUE	Uncertain	Left-hand side	TRUE	NA
49	21	First	Right-hand side	Right-hand side	TRUE	Certain	Right-hand side	TRUE	Certain
50	21	First	Right-hand side	Right-hand side	TRUE	Certain	Right-hand side	TRUE	Uncertain
51	21	First	Right-hand side	Right-hand side	TRUE	Uncertain	Right-hand side	TRUE	Uncertain
52	21	First	Right-hand side	Right-hand side	TRUE	Certain	Right-hand side	TRUE	Certain
53	21	First	Left-hand side	Left-hand side	TRUE	Certain	Left-hand side	TRUE	Certain
54	21	First	Right-hand side	Right-hand side	TRUE	Uncertain	Right-hand side	TRUE	Uncertain
55	21	First	Right-hand side	Left-hand side	FALSE	Uncertain	Left-hand side	FALSE	Uncertain
56	21	First	Left-hand side	Left-hand side	TRUE	Certain	Right-hand side	FALSE	Certain
57	21	First	Left-hand side	Left-hand side	TRUE	Certain	Left-hand side	TRUE	Uncertain
58	21	First	Right-hand side	Left-hand side	FALSE	Uncertain	Right-hand side	TRUE	Certain
59	21	First	Right-hand side	Right-hand side	TRUE	Uncertain	Left-hand side	FALSE	Uncertain
60	21	First	Right-hand side	Left-hand side	FALSE	Certain	Left-hand side	FALSE	Uncertain
1	22	First	Right-hand side	Left-hand side	FALSE	Certain	Right-hand side	TRUE	Uncertain
2	22	First	Right-hand side	Right-hand side	TRUE	Certain	Right-hand side	TRUE	Certain
3	22	First	Left-hand side	Right-hand side	FALSE	Certain	Left-hand side	TRUE	Uncertain
4	22	First	Left-hand side	Left-hand side	TRUE	Uncertain	Left-hand side	TRUE	Certain
5	22	First	Left-hand side	Left-hand side	TRUE	Certain	Left-hand side	TRUE	Uncertain
6	22	First	Right-hand side	Left-hand side	FALSE	Certain	Right-hand side	TRUE	Certain
7	22	First	Right-hand side	Right-hand side	TRUE	Certain	Right-hand side	TRUE	Certain
8	22	First	Right-hand side	Right-hand side	TRUE	Certain	Right-hand side	TRUE	Uncertain
9	22	First	Right-hand side	Right-hand side	TRUE	Certain	Left-hand side	FALSE	Certain
10	22	First	Left-hand side	Right-hand side	FALSE	Certain	Left-hand side	TRUE	Uncertain
11	22	First	Right-hand side	Right-hand side	TRUE	Certain	Left-hand side	FALSE	Uncertain
12	22	First	Left-hand side	Left-hand side	TRUE	Certain	Right-hand side	FALSE	Uncertain
13	22	First	Left-hand side	Left-hand side	TRUE	Uncertain	Right-hand side	FALSE	Uncertain
14	22	First	Right-hand side	Right-hand side	TRUE	Certain	Right-hand side	TRUE	Certain
15	22	First	Right-hand side	Right-hand side	TRUE	Certain	Left-hand side	FALSE	Certain
16	22	First	Left-hand side	Right-hand side	FALSE	Certain	Left-hand side	TRUE	Uncertain
17	22	First	Left-hand side	Right-hand side	FALSE	Uncertain	Right-hand side	FALSE	Certain
18	22	First	Right-hand side	Left-hand side	FALSE	Certain	Right-hand side	TRUE	Certain
19	22	First	Right-hand side	Right-hand side	TRUE	Certain	Right-hand side	TRUE	Certain
20	22	First	Right-hand side	Left-hand side	FALSE	Certain	Left-hand side	FALSE	Uncertain
21	22	First	Left-hand side	Left-hand side	TRUE	Certain	Left-hand side	TRUE	Certain
22	22	First	Right-hand side	Right-hand side	TRUE	Certain	Left-hand side	FALSE	Uncertain
23	22	First	Left-hand side	Right-hand side	FALSE	Certain	Right-hand side	FALSE	NA
24	22	First	Right-hand side	Left-hand side	FALSE	Certain	Right-hand side	TRUE	Uncertain
25	22	First	Right-hand side	Right-hand side	TRUE	Certain	Left-hand side	FALSE	Certain
26	22	First	Left-hand side	Right-hand side	FALSE	Certain	Right-hand side	FALSE	Uncertain
27	22	First	Right-hand side	Right-hand side	TRUE	Certain	Left-hand side	FALSE	Uncertain
28	22	First	Left-hand side	Left-hand side	TRUE	Certain	Right-hand side	FALSE	Certain
29	22	First	Right-hand side	Right-hand side	TRUE	Certain	Left-hand side	FALSE	Uncertain
30	22	First	Left-hand side	Right-hand side	FALSE	Uncertain	Right-hand side	FALSE	Uncertain
31	22	First	Right-hand side	Right-hand side	TRUE	Certain	Left-hand side	FALSE	Certain
32	22	First	Left-hand side	Right-hand side	FALSE	Certain	Right-hand side	FALSE	Uncertain
33	22	First	Right-hand side	Right-hand side	TRUE	Uncertain	Right-hand side	TRUE	Certain
34	22	First	Right-hand side	Right-hand side	TRUE	Certain	Left-hand side	FALSE	Uncertain
35	22	First	Right-hand side	Right-hand side	TRUE	Certain	Left-hand side	FALSE	Uncertain
36	22	First	Left-hand side	Left-hand side	TRUE	Uncertain	Right-hand side	FALSE	Certain
37	22	First	Right-hand side	Left-hand side	FALSE	Certain	Left-hand side	FALSE	Uncertain
38	22	First	Left-hand side	Left-hand side	TRUE	Certain	Right-hand side	FALSE	Certain
39	22	First	Right-hand side	Right-hand side	TRUE	Certain	Left-hand side	FALSE	Certain
40	22	First	Left-hand side	Right-hand side	FALSE	Uncertain	Right-hand side	FALSE	Certain
41	22	First	Left-hand side	Left-hand side	TRUE	Uncertain	Right-hand side	FALSE	Certain
42	22	First	Right-hand side	Right-hand side	TRUE	Certain	Left-hand side	FALSE	Uncertain
43	22	First	Right-hand side	Right-hand side	TRUE	Uncertain	Left-hand side	FALSE	Uncertain
44	22	First	Right-hand side	Right-hand side	TRUE	Certain	Right-hand side	TRUE	Certain
45	22	First	Left-hand side	Right-hand side	FALSE	Certain	Left-hand side	TRUE	Certain
46	22	First	Left-hand side	Right-hand side	FALSE	Certain	Left-hand side	TRUE	Uncertain
47	22	First	Left-hand side	Left-hand side	TRUE	Certain	Left-hand side	TRUE	Certain
48	22	First	Left-hand side	Right-hand side	FALSE	Certain	Left-hand side	TRUE	Certain
49	22	First	Left-hand side	Left-hand side	TRUE	Certain	Left-hand side	TRUE	Certain
50	22	First	Right-hand side	Right-hand side	TRUE	Certain	Right-hand side	TRUE	Certain
51	22	First	Right-hand side	Right-hand side	TRUE	Certain	Left-hand side	FALSE	Uncertain
52	22	First	Left-hand side	Right-hand side	FALSE	Uncertain	Left-hand side	TRUE	Certain
53	22	First	Left-hand side	Right-hand side	FALSE	Certain	Left-hand side	TRUE	Uncertain
54	22	First	Right-hand side	Right-hand side	TRUE	Certain	Right-hand side	TRUE	Certain
55	22	First	Left-hand side	Right-hand side	FALSE	Certain	Left-hand side	TRUE	Certain
56	22	First	Right-hand side	Right-hand side	TRUE	Certain	Right-hand side	TRUE	Certain
57	22	First	Left-hand side	Left-hand side	TRUE	Certain	Left-hand side	TRUE	Uncertain
58	22	First	Left-hand side	Right-hand side	FALSE	Certain	Left-hand side	TRUE	Uncertain
59	22	First	Left-hand side	Right-hand side	FALSE	Certain	Left-hand side	TRUE	Certain
60	22	First	Right-hand side	Right-hand side	TRUE	Certain	Right-hand side	TRUE	Certain
1	23	First	Right-hand side	Left-hand side	FALSE	Certain	Right-hand side	TRUE	Certain
2	23	First	Left-hand side	Left-hand side	TRUE	Certain	Left-hand side	TRUE	Certain
3	23	First	Left-hand side	Right-hand side	FALSE	Uncertain	Right-hand side	FALSE	Certain
4	23	First	Right-hand side	Right-hand side	TRUE	Certain	Left-hand side	FALSE	Certain
5	23	First	Right-hand side	Left-hand side	FALSE	NA	Right-hand side	TRUE	Certain
6	23	First	Left-hand side	Right-hand side	FALSE	Uncertain	Right-hand side	FALSE	Certain
7	23	First	Left-hand side	Left-hand side	TRUE	Certain	Left-hand side	TRUE	Uncertain
8	23	First	Left-hand side	Left-hand side	TRUE	Certain	Right-hand side	FALSE	Certain
9	23	First	Right-hand side	Right-hand side	TRUE	Certain	Left-hand side	FALSE	Uncertain
10	23	First	Left-hand side	Left-hand side	TRUE	Certain	Left-hand side	TRUE	Certain
11	23	First	Right-hand side	Right-hand side	TRUE	Certain	Left-hand side	FALSE	Certain
12	23	First	Right-hand side	Left-hand side	FALSE	Uncertain	Right-hand side	TRUE	Certain
13	23	First	Left-hand side	Right-hand side	FALSE	Certain	Left-hand side	TRUE	Certain
14	23	First	Left-hand side	Left-hand side	TRUE	Certain	Right-hand side	FALSE	Certain
15	23	First	Left-hand side	Left-hand side	TRUE	Certain	Left-hand side	TRUE	Uncertain
16	23	First	Left-hand side	Left-hand side	TRUE	Certain	Left-hand side	TRUE	Certain
17	23	First	Left-hand side	Left-hand side	TRUE	Certain	Left-hand side	TRUE	Certain
18	23	First	Left-hand side	Right-hand side	FALSE	Certain	Left-hand side	TRUE	Certain
19	23	First	Right-hand side	Right-hand side	TRUE	Certain	Right-hand side	TRUE	Certain
20	23	First	Left-hand side	Right-hand side	FALSE	Uncertain	Right-hand side	FALSE	Uncertain
21	23	First	Left-hand side	Left-hand side	TRUE	Certain	Left-hand side	TRUE	Certain
22	23	First	Left-hand side	Right-hand side	FALSE	Certain	Left-hand side	TRUE	Uncertain
23	23	First	Left-hand side	Left-hand side	TRUE	Certain	Left-hand side	TRUE	Certain
24	23	First	Left-hand side	Left-hand side	TRUE	Certain	Left-hand side	TRUE	Certain
25	23	First	Right-hand side	Right-hand side	TRUE	Certain	Right-hand side	TRUE	Certain
26	23	First	Left-hand side	Left-hand side	TRUE	Certain	Right-hand side	FALSE	Certain
27	23	First	Right-hand side	Left-hand side	FALSE	Certain	Left-hand side	FALSE	Uncertain
28	23	First	Left-hand side	Left-hand side	TRUE	Certain	Right-hand side	FALSE	Certain
29	23	First	Left-hand side	Right-hand side	FALSE	Certain	Left-hand side	TRUE	Uncertain
30	23	First	Left-hand side	Left-hand side	TRUE	Certain	Left-hand side	TRUE	Certain
31	23	First	Right-hand side	Right-hand side	TRUE	Certain	Right-hand side	TRUE	Certain
32	23	First	Right-hand side	Right-hand side	TRUE	Certain	Right-hand side	TRUE	Certain
33	23	First	Left-hand side	Left-hand side	TRUE	Certain	Right-hand side	FALSE	Certain
34	23	First	Right-hand side	Right-hand side	TRUE	Certain	Left-hand side	FALSE	Certain
35	23	First	Right-hand side	Right-hand side	TRUE	Certain	Left-hand side	FALSE	Certain
36	23	First	Left-hand side	Left-hand side	TRUE	Certain	Left-hand side	TRUE	Certain
37	23	First	Right-hand side	Right-hand side	TRUE	Certain	Right-hand side	TRUE	Uncertain
38	23	First	Left-hand side	Left-hand side	TRUE	Certain	Left-hand side	TRUE	Certain
39	23	First	Left-hand side	Right-hand side	FALSE	Certain	Left-hand side	TRUE	Certain
40	23	First	Left-hand side	Right-hand side	FALSE	Uncertain	Right-hand side	FALSE	Certain
41	23	First	Right-hand side	Right-hand side	TRUE	Certain	Left-hand side	FALSE	Uncertain
42	23	First	Right-hand side	Left-hand side	FALSE	Certain	Right-hand side	TRUE	Certain
43	23	First	Right-hand side	Left-hand side	FALSE	Certain	Left-hand side	FALSE	Uncertain
44	23	First	Right-hand side	Right-hand side	TRUE	Uncertain	Right-hand side	TRUE	Certain
45	23	First	Right-hand side	Right-hand side	TRUE	Certain	Right-hand side	TRUE	Certain
46	23	First	Left-hand side	Right-hand side	FALSE	Certain	Right-hand side	FALSE	Certain
47	23	First	Left-hand side	Left-hand side	TRUE	Certain	Left-hand side	TRUE	Certain
48	23	First	Right-hand side	Right-hand side	TRUE	Certain	Left-hand side	FALSE	Uncertain
49	23	First	Left-hand side	Left-hand side	TRUE	Certain	Left-hand side	TRUE	Certain
50	23	First	Left-hand side	Left-hand side	TRUE	Certain	Right-hand side	FALSE	Certain
51	23	First	Right-hand side	Right-hand side	TRUE	Certain	Left-hand side	FALSE	Uncertain
52	23	First	Right-hand side	Right-hand side	TRUE	Certain	Left-hand side	FALSE	Uncertain
53	23	First	Right-hand side	Right-hand side	TRUE	Certain	Right-hand side	TRUE	Uncertain
54	23	First	Right-hand side	Right-hand side	TRUE	Certain	Right-hand side	TRUE	Certain
55	23	First	Right-hand side	Right-hand side	TRUE	Certain	Right-hand side	TRUE	Certain
56	23	First	Right-hand side	Right-hand side	TRUE	Certain	Left-hand side	FALSE	Uncertain
57	23	First	Left-hand side	Left-hand side	TRUE	Certain	Left-hand side	TRUE	Certain
58	23	First	Right-hand side	Left-hand side	FALSE	Certain	Left-hand side	FALSE	Uncertain
59	23	First	Left-hand side	Left-hand side	TRUE	Certain	Left-hand side	TRUE	Certain
60	23	First	Right-hand side	Left-hand side	FALSE	Certain	Right-hand side	TRUE	Uncertain
1	24	First	Right-hand side	Left-hand side	FALSE	Certain	Right-hand side	TRUE	Certain
2	24	First	Left-hand side	Right-hand side	FALSE	NA	Left-hand side	TRUE	Certain
3	24	First	Right-hand side	Left-hand side	FALSE	Certain	Left-hand side	FALSE	Certain
4	24	First	Right-hand side	Right-hand side	TRUE	Certain	Right-hand side	TRUE	Certain
5	24	First	Right-hand side	Right-hand side	TRUE	Certain	Right-hand side	TRUE	Certain
6	24	First	Right-hand side	Left-hand side	FALSE	Certain	Left-hand side	FALSE	NA
7	24	First	Right-hand side	Right-hand side	TRUE	Certain	Right-hand side	TRUE	Uncertain
8	24	First	Left-hand side	Left-hand side	TRUE	Certain	Left-hand side	TRUE	Certain
9	24	First	Left-hand side	Left-hand side	TRUE	Uncertain	Right-hand side	FALSE	Certain
10	24	First	Left-hand side	Left-hand side	TRUE	Certain	Left-hand side	TRUE	Certain
11	24	First	Left-hand side	Left-hand side	TRUE	Certain	Left-hand side	TRUE	Certain
12	24	First	Left-hand side	Left-hand side	TRUE	Certain	Left-hand side	TRUE	Certain
13	24	First	Right-hand side	Left-hand side	FALSE	Uncertain	Right-hand side	TRUE	Certain
14	24	First	Left-hand side	Left-hand side	TRUE	Certain	Left-hand side	TRUE	Certain
15	24	First	Left-hand side	Right-hand side	FALSE	Certain	Left-hand side	TRUE	Uncertain
16	24	First	Right-hand side	Right-hand side	TRUE	Certain	Right-hand side	TRUE	Certain
17	24	First	Right-hand side	Right-hand side	TRUE	Certain	Right-hand side	TRUE	Certain
18	24	First	Left-hand side	Left-hand side	TRUE	Certain	Left-hand side	TRUE	Certain
19	24	First	Right-hand side	Right-hand side	TRUE	Certain	Right-hand side	TRUE	Certain
20	24	First	Right-hand side	Right-hand side	TRUE	Certain	Right-hand side	TRUE	Certain
21	24	First	Left-hand side	Right-hand side	FALSE	Uncertain	Right-hand side	FALSE	Certain
22	24	First	Right-hand side	Right-hand side	TRUE	Uncertain	Right-hand side	TRUE	Certain
23	24	First	Right-hand side	Right-hand side	TRUE	Certain	Left-hand side	FALSE	Certain
24	24	First	Right-hand side	Right-hand side	TRUE	Certain	Right-hand side	TRUE	Certain
25	24	First	Left-hand side	Left-hand side	TRUE	Certain	Left-hand side	TRUE	Certain
26	24	First	Left-hand side	Left-hand side	TRUE	Certain	Left-hand side	TRUE	Certain
27	24	First	Left-hand side	Right-hand side	FALSE	Certain	Right-hand side	FALSE	Certain
28	24	First	Right-hand side	Right-hand side	TRUE	Uncertain	Right-hand side	TRUE	Certain
29	24	First	Left-hand side	Left-hand side	TRUE	Certain	Left-hand side	TRUE	Certain
30	24	First	Left-hand side	Left-hand side	TRUE	Certain	Left-hand side	TRUE	Certain
31	24	First	Left-hand side	Right-hand side	FALSE	Certain	Left-hand side	TRUE	Certain
32	24	First	Left-hand side	Left-hand side	TRUE	Certain	Right-hand side	FALSE	Certain
33	24	First	Left-hand side	Right-hand side	FALSE	Uncertain	Right-hand side	FALSE	Certain
34	24	First	Right-hand side	Left-hand side	FALSE	Certain	Right-hand side	TRUE	Certain
35	24	First	Right-hand side	Right-hand side	TRUE	Certain	Right-hand side	TRUE	Certain
36	24	First	Right-hand side	Right-hand side	TRUE	Certain	Left-hand side	FALSE	Certain
37	24	First	Right-hand side	Right-hand side	TRUE	Certain	Right-hand side	TRUE	Certain
38	24	First	Left-hand side	Left-hand side	TRUE	Certain	Left-hand side	TRUE	Certain
39	24	First	Left-hand side	Left-hand side	TRUE	Certain	Right-hand side	FALSE	Certain
40	24	First	Left-hand side	Left-hand side	TRUE	Uncertain	Left-hand side	TRUE	Uncertain
41	24	First	Left-hand side	Right-hand side	FALSE	Certain	Left-hand side	TRUE	Uncertain
42	24	First	Right-hand side	Left-hand side	FALSE	Certain	Left-hand side	FALSE	Certain
43	24	First	Left-hand side	Left-hand side	TRUE	Uncertain	Left-hand side	TRUE	Certain
44	24	First	Right-hand side	Right-hand side	TRUE	Certain	Right-hand side	TRUE	Certain
45	24	First	Left-hand side	Left-hand side	TRUE	Uncertain	Left-hand side	TRUE	Certain
46	24	First	Left-hand side	Left-hand side	TRUE	Certain	Right-hand side	FALSE	Certain
47	24	First	Right-hand side	Right-hand side	TRUE	Certain	Right-hand side	TRUE	Certain
48	24	First	Right-hand side	Right-hand side	TRUE	Certain	Right-hand side	TRUE	Certain
49	24	First	Right-hand side	Right-hand side	TRUE	Certain	Right-hand side	TRUE	Certain
50	24	First	Left-hand side	Left-hand side	TRUE	Certain	Right-hand side	FALSE	Certain
51	24	First	Right-hand side	Right-hand side	TRUE	Certain	Left-hand side	FALSE	Uncertain
52	24	First	Left-hand side	Left-hand side	TRUE	Certain	Right-hand side	FALSE	Certain
53	24	First	Left-hand side	Right-hand side	FALSE	Certain	Right-hand side	FALSE	Certain
54	24	First	Left-hand side	Left-hand side	TRUE	Certain	Right-hand side	FALSE	Certain
55	24	First	Left-hand side	Left-hand side	TRUE	Certain	Left-hand side	TRUE	Certain
56	24	First	Left-hand side	Left-hand side	TRUE	Certain	Left-hand side	TRUE	Certain
57	24	First	Right-hand side	Right-hand side	TRUE	NA	Right-hand side	TRUE	Uncertain
58	24	First	Left-hand side	Right-hand side	FALSE	Certain	Right-hand side	FALSE	Certain
59	24	First	Right-hand side	Right-hand side	TRUE	Certain	Right-hand side	TRUE	Certain
60	24	First	Right-hand side	Right-hand side	TRUE	Certain	Left-hand side	FALSE	Certain
1	25	First	Right-hand side	Right-hand side	TRUE	Certain	Right-hand side	TRUE	Uncertain
2	25	First	Right-hand side	Left-hand side	FALSE	Certain	Right-hand side	TRUE	Certain
3	25	First	Right-hand side	Right-hand side	TRUE	Uncertain	Right-hand side	TRUE	Uncertain
4	25	First	Left-hand side	Left-hand side	TRUE	Certain	Left-hand side	TRUE	Certain
5	25	First	Right-hand side	Left-hand side	FALSE	Uncertain	Right-hand side	TRUE	Certain
6	25	First	Right-hand side	Left-hand side	FALSE	Certain	Left-hand side	FALSE	Certain
7	25	First	Right-hand side	Right-hand side	TRUE	Certain	Right-hand side	TRUE	Certain
8	25	First	Right-hand side	Left-hand side	FALSE	Certain	Left-hand side	FALSE	Certain
9	25	First	Left-hand side	Left-hand side	TRUE	Certain	Left-hand side	TRUE	NA
10	25	First	Right-hand side	Right-hand side	TRUE	Uncertain	Left-hand side	FALSE	Certain
11	25	First	Left-hand side	Left-hand side	TRUE	Certain	Left-hand side	TRUE	Certain
12	25	First	Left-hand side	Left-hand side	TRUE	Certain	Left-hand side	TRUE	Certain
13	25	First	Right-hand side	Left-hand side	FALSE	Uncertain	Right-hand side	TRUE	Uncertain
14	25	First	Right-hand side	Right-hand side	TRUE	Uncertain	Left-hand side	FALSE	Certain
15	25	First	Left-hand side	Left-hand side	TRUE	Certain	Left-hand side	TRUE	Certain
16	25	First	Right-hand side	Right-hand side	TRUE	Uncertain	Right-hand side	TRUE	Certain
17	25	First	Right-hand side	Left-hand side	FALSE	Certain	Right-hand side	TRUE	Certain
18	25	First	Left-hand side	Left-hand side	TRUE	Certain	Left-hand side	TRUE	Certain
19	25	First	Right-hand side	Right-hand side	TRUE	Uncertain	Right-hand side	TRUE	Certain
20	25	First	Right-hand side	Right-hand side	TRUE	Certain	Right-hand side	TRUE	Certain
21	25	First	Right-hand side	Right-hand side	TRUE	Uncertain	Right-hand side	TRUE	Uncertain
22	25	First	Right-hand side	Right-hand side	TRUE	Certain	Left-hand side	FALSE	Uncertain
23	25	First	Right-hand side	Left-hand side	FALSE	Uncertain	Right-hand side	TRUE	Certain
24	25	First	Left-hand side	Left-hand side	TRUE	Certain	Left-hand side	TRUE	Certain
25	25	First	Right-hand side	Left-hand side	FALSE	Certain	Right-hand side	TRUE	Certain
26	25	First	Left-hand side	Left-hand side	TRUE	Certain	Left-hand side	TRUE	Certain
27	25	First	Right-hand side	Left-hand side	FALSE	Uncertain	Right-hand side	TRUE	Certain
28	25	First	Left-hand side	Right-hand side	FALSE	NA	Left-hand side	TRUE	Certain
29	25	First	Left-hand side	Left-hand side	TRUE	Certain	Left-hand side	TRUE	Certain
30	25	First	Right-hand side	Right-hand side	TRUE	Certain	Right-hand side	TRUE	Certain
31	25	First	Left-hand side	Left-hand side	TRUE	Certain	Left-hand side	TRUE	Certain
32	25	First	Right-hand side	Right-hand side	TRUE	Certain	Right-hand side	TRUE	Certain
33	25	First	Right-hand side	Right-hand side	TRUE	Certain	Right-hand side	TRUE	Certain
34	25	First	Right-hand side	Right-hand side	TRUE	Certain	Right-hand side	TRUE	Uncertain
35	25	First	Left-hand side	Left-hand side	TRUE	Certain	Left-hand side	TRUE	Certain
36	25	First	Right-hand side	Left-hand side	FALSE	Uncertain	Right-hand side	TRUE	Uncertain
37	25	First	Left-hand side	Left-hand side	TRUE	Certain	Left-hand side	TRUE	Certain
38	25	First	Right-hand side	Right-hand side	TRUE	Uncertain	Right-hand side	TRUE	Uncertain
39	25	First	Left-hand side	Left-hand side	TRUE	Uncertain	Left-hand side	TRUE	Certain
40	25	First	Right-hand side	Right-hand side	TRUE	Certain	Right-hand side	TRUE	Certain
41	25	First	Right-hand side	Right-hand side	TRUE	Uncertain	Right-hand side	TRUE	Certain
42	25	First	Left-hand side	Right-hand side	FALSE	Uncertain	Left-hand side	TRUE	Certain
43	25	First	Left-hand side	Left-hand side	TRUE	Certain	Left-hand side	TRUE	NA
44	25	First	Left-hand side	Right-hand side	FALSE	Uncertain	Left-hand side	TRUE	Certain
45	25	First	Left-hand side	Left-hand side	TRUE	Certain	Left-hand side	TRUE	Certain
46	25	First	Left-hand side	Left-hand side	TRUE	Certain	Left-hand side	TRUE	Uncertain
47	25	First	Right-hand side	Right-hand side	TRUE	Certain	Right-hand side	TRUE	Certain
48	25	First	Right-hand side	Right-hand side	TRUE	Certain	Right-hand side	TRUE	Certain
49	25	First	Left-hand side	Right-hand side	FALSE	Uncertain	Left-hand side	TRUE	Certain
50	25	First	Left-hand side	Left-hand side	TRUE	Uncertain	Left-hand side	TRUE	NA
51	25	First	Right-hand side	Right-hand side	TRUE	Certain	Right-hand side	TRUE	Uncertain
52	25	First	Left-hand side	Right-hand side	FALSE	Uncertain	Left-hand side	TRUE	NA
53	25	First	Right-hand side	Right-hand side	TRUE	Certain	Right-hand side	TRUE	Certain
54	25	First	Left-hand side	Left-hand side	TRUE	Certain	Left-hand side	TRUE	Certain
55	25	First	Left-hand side	Left-hand side	TRUE	Uncertain	Left-hand side	TRUE	NA
56	25	First	Left-hand side	Left-hand side	TRUE	Certain	Left-hand side	TRUE	Uncertain
57	25	First	Right-hand side	Right-hand side	TRUE	Certain	Right-hand side	TRUE	Certain
58	25	First	Right-hand side	Right-hand side	TRUE	Certain	Right-hand side	TRUE	Certain
59	25	First	Right-hand side	Right-hand side	TRUE	Certain	Right-hand side	TRUE	Certain
60	25	First	Right-hand side	Right-hand side	TRUE	Certain	Right-hand side	TRUE	Certain
1	26	First	Left-hand side	Left-hand side	TRUE	Uncertain	Right-hand side	FALSE	Uncertain
2	26	First	Right-hand side	Right-hand side	TRUE	Certain	Right-hand side	TRUE	Uncertain
3	26	First	Left-hand side	Left-hand side	TRUE	Certain	Left-hand side	TRUE	Uncertain
4	26	First	Right-hand side	Right-hand side	TRUE	Uncertain	Right-hand side	TRUE	NA
5	26	First	Left-hand side	Left-hand side	TRUE	Uncertain	Right-hand side	FALSE	Certain
6	26	First	Left-hand side	Left-hand side	TRUE	Certain	Left-hand side	TRUE	Certain
7	26	First	Right-hand side	Right-hand side	TRUE	Certain	Right-hand side	TRUE	Certain
8	26	First	Left-hand side	Left-hand side	TRUE	Uncertain	Left-hand side	TRUE	Certain
9	26	First	Right-hand side	Left-hand side	FALSE	Uncertain	Right-hand side	TRUE	Certain
10	26	First	Left-hand side	Left-hand side	TRUE	Certain	Left-hand side	TRUE	Certain
11	26	First	Left-hand side	Left-hand side	TRUE	Certain	Right-hand side	FALSE	Certain
12	26	First	Left-hand side	Left-hand side	TRUE	Uncertain	Left-hand side	TRUE	Certain
13	26	First	Right-hand side	Right-hand side	TRUE	Certain	Right-hand side	TRUE	Certain
14	26	First	Right-hand side	Right-hand side	TRUE	Uncertain	Right-hand side	TRUE	Certain
15	26	First	Left-hand side	Left-hand side	TRUE	Certain	Right-hand side	FALSE	Certain
16	26	First	Right-hand side	Right-hand side	TRUE	Certain	Right-hand side	TRUE	Certain
17	26	First	Right-hand side	Left-hand side	FALSE	Certain	Right-hand side	TRUE	Certain
18	26	First	Left-hand side	Left-hand side	TRUE	Certain	Left-hand side	TRUE	Certain
19	26	First	Left-hand side	Left-hand side	TRUE	Certain	Left-hand side	TRUE	Certain
20	26	First	Right-hand side	Right-hand side	TRUE	Certain	Right-hand side	TRUE	Certain
21	26	First	Left-hand side	Left-hand side	TRUE	Certain	Left-hand side	TRUE	Certain
22	26	First	Right-hand side	Right-hand side	TRUE	Certain	Left-hand side	FALSE	Certain
23	26	First	Left-hand side	Left-hand side	TRUE	Certain	Right-hand side	FALSE	Certain
24	26	First	Left-hand side	Left-hand side	TRUE	Certain	Left-hand side	TRUE	Uncertain
25	26	First	Right-hand side	Right-hand side	TRUE	Certain	Right-hand side	TRUE	Certain
26	26	First	Left-hand side	Left-hand side	TRUE	Certain	Left-hand side	TRUE	Certain
27	26	First	Left-hand side	Right-hand side	FALSE	Certain	Right-hand side	FALSE	NA
28	26	First	Right-hand side	Right-hand side	TRUE	Certain	Right-hand side	TRUE	Certain
29	26	First	Right-hand side	Left-hand side	FALSE	Certain	Right-hand side	TRUE	Certain
30	26	First	Left-hand side	Right-hand side	FALSE	Uncertain	Left-hand side	TRUE	Certain
31	26	First	Left-hand side	Left-hand side	TRUE	Uncertain	Left-hand side	TRUE	NA
32	26	First	Right-hand side	Right-hand side	TRUE	Certain	Right-hand side	TRUE	Certain
33	26	First	Right-hand side	Left-hand side	FALSE	Uncertain	Right-hand side	TRUE	Certain
34	26	First	Right-hand side	Right-hand side	TRUE	Certain	Right-hand side	TRUE	NA
35	26	First	Right-hand side	Left-hand side	FALSE	Certain	Right-hand side	TRUE	Certain
36	26	First	Right-hand side	Right-hand side	TRUE	Certain	Right-hand side	TRUE	Certain
37	26	First	Right-hand side	Left-hand side	FALSE	Uncertain	Left-hand side	FALSE	Uncertain
38	26	First	Right-hand side	Right-hand side	TRUE	Certain	Right-hand side	TRUE	Certain
39	26	First	Right-hand side	Right-hand side	TRUE	Uncertain	Right-hand side	TRUE	Certain
40	26	First	Right-hand side	Right-hand side	TRUE	Certain	Right-hand side	TRUE	Certain
41	26	First	Right-hand side	Right-hand side	TRUE	Certain	Left-hand side	FALSE	Uncertain
42	26	First	Left-hand side	Right-hand side	FALSE	Uncertain	Right-hand side	FALSE	Certain
43	26	First	Left-hand side	Left-hand side	TRUE	Uncertain	Left-hand side	TRUE	Certain
44	26	First	Left-hand side	Left-hand side	TRUE	Uncertain	Left-hand side	TRUE	Certain
45	26	First	Left-hand side	Left-hand side	TRUE	Uncertain	Left-hand side	TRUE	Certain
46	26	First	Right-hand side	Right-hand side	TRUE	Uncertain	Right-hand side	TRUE	Certain
47	26	First	Right-hand side	Right-hand side	TRUE	Certain	Left-hand side	FALSE	Certain
48	26	First	Right-hand side	Left-hand side	FALSE	Uncertain	Right-hand side	TRUE	Certain
49	26	First	Right-hand side	Right-hand side	TRUE	Uncertain	Left-hand side	FALSE	NA
50	26	First	Right-hand side	Left-hand side	FALSE	Uncertain	Left-hand side	FALSE	Certain
51	26	First	Right-hand side	Right-hand side	TRUE	Uncertain	Right-hand side	TRUE	Certain
52	26	First	Right-hand side	Left-hand side	FALSE	Uncertain	Right-hand side	TRUE	Certain
53	26	First	Right-hand side	Left-hand side	FALSE	Uncertain	Right-hand side	TRUE	Certain
54	26	First	Right-hand side	Right-hand side	TRUE	Uncertain	Left-hand side	FALSE	Certain
55	26	First	Left-hand side	Left-hand side	TRUE	Uncertain	Right-hand side	FALSE	Uncertain
56	26	First	Left-hand side	Left-hand side	TRUE	Certain	Right-hand side	FALSE	Certain
57	26	First	Left-hand side	Left-hand side	TRUE	Uncertain	Left-hand side	TRUE	Certain
58	26	First	Left-hand side	Left-hand side	TRUE	Uncertain	Left-hand side	TRUE	Certain
59	26	First	Right-hand side	Right-hand side	TRUE	Uncertain	Right-hand side	TRUE	Certain
60	26	First	Right-hand side	Left-hand side	FALSE	Uncertain	Left-hand side	FALSE	Certain
1	27	First	Left-hand side	Left-hand side	TRUE	Certain	Left-hand side	TRUE	Certain
2	27	First	Left-hand side	Right-hand side	FALSE	Certain	Right-hand side	FALSE	NA
3	27	First	Left-hand side	Left-hand side	TRUE	Certain	Left-hand side	TRUE	Certain
4	27	First	Right-hand side	Left-hand side	FALSE	Certain	Right-hand side	TRUE	NA
5	27	First	Right-hand side	Left-hand side	FALSE	Certain	Right-hand side	TRUE	Certain
6	27	First	Left-hand side	Left-hand side	TRUE	Certain	Left-hand side	TRUE	Certain
7	27	First	Right-hand side	Right-hand side	TRUE	Certain	Right-hand side	TRUE	NA
8	27	First	Left-hand side	Right-hand side	FALSE	Certain	Left-hand side	TRUE	Certain
9	27	First	Right-hand side	Left-hand side	FALSE	Certain	Right-hand side	TRUE	Certain
10	27	First	Right-hand side	Left-hand side	FALSE	Certain	Left-hand side	FALSE	Certain
11	27	First	Right-hand side	Left-hand side	FALSE	Certain	Left-hand side	FALSE	Certain
12	27	First	Right-hand side	Right-hand side	TRUE	Certain	Right-hand side	TRUE	Certain
13	27	First	Left-hand side	Left-hand side	TRUE	Certain	Right-hand side	FALSE	NA
14	27	First	Left-hand side	Left-hand side	TRUE	Certain	Left-hand side	TRUE	Certain
15	27	First	Left-hand side	Right-hand side	FALSE	Certain	Left-hand side	TRUE	Certain
16	27	First	Left-hand side	Left-hand side	TRUE	Certain	Left-hand side	TRUE	Certain
17	27	First	Right-hand side	Right-hand side	TRUE	Certain	Right-hand side	TRUE	Certain
18	27	First	Right-hand side	Right-hand side	TRUE	Certain	Right-hand side	TRUE	Uncertain
19	27	First	Left-hand side	Left-hand side	TRUE	Certain	Left-hand side	TRUE	Certain
20	27	First	Left-hand side	Right-hand side	FALSE	Uncertain	Left-hand side	TRUE	Uncertain
21	27	First	Left-hand side	Left-hand side	TRUE	Certain	Left-hand side	TRUE	Certain
22	27	First	Right-hand side	Right-hand side	TRUE	Certain	Right-hand side	TRUE	Uncertain
23	27	First	Right-hand side	Right-hand side	TRUE	Certain	Left-hand side	FALSE	Certain
24	27	First	Left-hand side	Left-hand side	TRUE	Certain	Left-hand side	TRUE	Certain
25	27	First	Right-hand side	Left-hand side	FALSE	Certain	Right-hand side	TRUE	Certain
26	27	First	Left-hand side	Left-hand side	TRUE	Certain	Left-hand side	TRUE	Certain
27	27	First	Right-hand side	Right-hand side	TRUE	Certain	Left-hand side	FALSE	Uncertain
28	27	First	Right-hand side	Right-hand side	TRUE	Certain	Right-hand side	TRUE	Certain
29	27	First	Left-hand side	Right-hand side	FALSE	Uncertain	Left-hand side	TRUE	Certain
30	27	First	Right-hand side	Right-hand side	TRUE	Certain	Right-hand side	TRUE	Certain
31	27	First	Left-hand side	Left-hand side	TRUE	Certain	Left-hand side	TRUE	Certain
32	27	First	Left-hand side	Left-hand side	TRUE	Certain	Left-hand side	TRUE	Certain
33	27	First	Left-hand side	Right-hand side	FALSE	Uncertain	Right-hand side	FALSE	Uncertain
34	27	First	Left-hand side	Left-hand side	TRUE	Certain	Left-hand side	TRUE	Certain
35	27	First	Left-hand side	Left-hand side	TRUE	Certain	Left-hand side	TRUE	Certain
36	27	First	Left-hand side	Right-hand side	FALSE	Certain	Right-hand side	FALSE	Certain
37	27	First	Right-hand side	Right-hand side	TRUE	Uncertain	Right-hand side	TRUE	Certain
38	27	First	Right-hand side	Left-hand side	FALSE	Uncertain	Right-hand side	TRUE	Certain
39	27	First	Left-hand side	Left-hand side	TRUE	Certain	Left-hand side	TRUE	Certain
40	27	First	Right-hand side	Right-hand side	TRUE	Certain	Right-hand side	TRUE	Uncertain
41	27	First	Left-hand side	Left-hand side	TRUE	Certain	Left-hand side	TRUE	Uncertain
42	27	First	Right-hand side	Right-hand side	TRUE	Certain	Right-hand side	TRUE	Certain
43	27	First	Left-hand side	Left-hand side	TRUE	Certain	Left-hand side	TRUE	Certain
44	27	First	Right-hand side	Right-hand side	TRUE	Certain	Right-hand side	TRUE	Certain
45	27	First	Right-hand side	Right-hand side	TRUE	Certain	Right-hand side	TRUE	Uncertain
46	27	First	Left-hand side	Left-hand side	TRUE	Certain	Left-hand side	TRUE	Certain
47	27	First	Left-hand side	Left-hand side	TRUE	Certain	Left-hand side	TRUE	Certain
48	27	First	Left-hand side	Left-hand side	TRUE	Certain	Left-hand side	TRUE	Certain
49	27	First	Left-hand side	Left-hand side	TRUE	Certain	Left-hand side	TRUE	Certain
50	27	First	Left-hand side	Right-hand side	FALSE	Uncertain	Left-hand side	TRUE	Certain
51	27	First	Left-hand side	Left-hand side	TRUE	Certain	Left-hand side	TRUE	Certain
52	27	First	Left-hand side	Right-hand side	FALSE	Uncertain	Left-hand side	TRUE	Certain
53	27	First	Right-hand side	Right-hand side	TRUE	Certain	Right-hand side	TRUE	Uncertain
54	27	First	Right-hand side	Right-hand side	TRUE	Certain	Right-hand side	TRUE	Certain
55	27	First	Left-hand side	Left-hand side	TRUE	Certain	Left-hand side	TRUE	Certain
56	27	First	Left-hand side	Left-hand side	TRUE	Certain	Left-hand side	TRUE	Certain
57	27	First	Right-hand side	Right-hand side	TRUE	Certain	Right-hand side	TRUE	Certain
58	27	First	Left-hand side	Left-hand side	TRUE	Certain	Left-hand side	TRUE	Certain
59	27	First	Right-hand side	Right-hand side	TRUE	Certain	Right-hand side	TRUE	Certain
60	27	First	Left-hand side	Left-hand side	TRUE	Certain	Left-hand side	TRUE	Certain
1	28	First	Right-hand side	Left-hand side	FALSE	Certain	Right-hand side	TRUE	Certain
2	28	First	Right-hand side	Left-hand side	FALSE	Certain	Left-hand side	FALSE	Certain
3	28	First	Left-hand side	Left-hand side	TRUE	Certain	Right-hand side	FALSE	Certain
4	28	First	Right-hand side	Right-hand side	TRUE	Uncertain	Left-hand side	FALSE	Certain
5	28	First	Right-hand side	Right-hand side	TRUE	Certain	Right-hand side	TRUE	Certain
6	28	First	Right-hand side	Right-hand side	TRUE	Certain	Left-hand side	FALSE	Uncertain
7	28	First	Right-hand side	Right-hand side	TRUE	Uncertain	Right-hand side	TRUE	Certain
8	28	First	Left-hand side	Left-hand side	TRUE	Uncertain	Left-hand side	TRUE	Uncertain
9	28	First	Left-hand side	Left-hand side	TRUE	Uncertain	Left-hand side	TRUE	Certain
10	28	First	Right-hand side	Right-hand side	TRUE	Certain	Right-hand side	TRUE	Certain
11	28	First	Left-hand side	Left-hand side	TRUE	Uncertain	Left-hand side	TRUE	Certain
12	28	First	Left-hand side	Left-hand side	TRUE	Uncertain	Right-hand side	FALSE	Uncertain
13	28	First	Left-hand side	Left-hand side	TRUE	Certain	Left-hand side	TRUE	Certain
14	28	First	Left-hand side	Left-hand side	TRUE	Uncertain	Left-hand side	TRUE	Uncertain
15	28	First	Left-hand side	Right-hand side	FALSE	Uncertain	Left-hand side	TRUE	Certain
16	28	First	Left-hand side	Right-hand side	FALSE	Uncertain	Left-hand side	TRUE	Certain
17	28	First	Left-hand side	Left-hand side	TRUE	Uncertain	Left-hand side	TRUE	Certain
18	28	First	Left-hand side	Left-hand side	TRUE	Certain	Right-hand side	FALSE	Uncertain
19	28	First	Right-hand side	Right-hand side	TRUE	Certain	Right-hand side	TRUE	Certain
20	28	First	Right-hand side	Right-hand side	TRUE	Certain	Right-hand side	TRUE	Certain
21	28	First	Right-hand side	Left-hand side	FALSE	Uncertain	Left-hand side	FALSE	Uncertain
22	28	First	Right-hand side	Right-hand side	TRUE	Certain	Right-hand side	TRUE	Certain
23	28	First	Right-hand side	Right-hand side	TRUE	Certain	Right-hand side	TRUE	Uncertain
24	28	First	Right-hand side	Right-hand side	TRUE	Uncertain	Left-hand side	FALSE	Uncertain
25	28	First	Right-hand side	Left-hand side	FALSE	Uncertain	Right-hand side	TRUE	Certain
26	28	First	Left-hand side	Left-hand side	TRUE	Certain	Left-hand side	TRUE	Certain
27	28	First	Left-hand side	Left-hand side	TRUE	Uncertain	Left-hand side	TRUE	Certain
28	28	First	Left-hand side	Left-hand side	TRUE	Certain	Right-hand side	FALSE	Uncertain
29	28	First	Left-hand side	Right-hand side	FALSE	Certain	Left-hand side	TRUE	Certain
30	28	First	Right-hand side	Left-hand side	FALSE	Uncertain	Right-hand side	TRUE	Certain
31	28	First	Left-hand side	Left-hand side	TRUE	Uncertain	Left-hand side	TRUE	Certain
32	28	First	Left-hand side	Right-hand side	FALSE	Uncertain	Left-hand side	TRUE	Certain
33	28	First	Left-hand side	Right-hand side	FALSE	Uncertain	Right-hand side	FALSE	Uncertain
34	28	First	Right-hand side	Left-hand side	FALSE	Uncertain	Right-hand side	TRUE	Uncertain
35	28	First	Right-hand side	Left-hand side	FALSE	Uncertain	Left-hand side	FALSE	Uncertain
36	28	First	Right-hand side	Right-hand side	TRUE	Certain	Right-hand side	TRUE	Certain
37	28	First	Left-hand side	Right-hand side	FALSE	Uncertain	Left-hand side	TRUE	Certain
38	28	First	Left-hand side	Left-hand side	TRUE	Uncertain	Right-hand side	FALSE	Certain
39	28	First	Left-hand side	Right-hand side	FALSE	Certain	Left-hand side	TRUE	Certain
40	28	First	Right-hand side	Right-hand side	TRUE	Uncertain	Right-hand side	TRUE	Certain
41	28	First	Right-hand side	Right-hand side	TRUE	Certain	Right-hand side	TRUE	Certain
42	28	First	Left-hand side	Left-hand side	TRUE	Uncertain	Left-hand side	TRUE	Uncertain
43	28	First	Left-hand side	Right-hand side	FALSE	Certain	Right-hand side	FALSE	Uncertain
44	28	First	Left-hand side	Left-hand side	TRUE	Uncertain	Left-hand side	TRUE	Certain
45	28	First	Right-hand side	Right-hand side	TRUE	Certain	Right-hand side	TRUE	Certain
46	28	First	Right-hand side	Right-hand side	TRUE	Uncertain	Right-hand side	TRUE	Certain
47	28	First	Right-hand side	Right-hand side	TRUE	Uncertain	Left-hand side	FALSE	Certain
48	28	First	Right-hand side	Right-hand side	TRUE	Uncertain	Right-hand side	TRUE	Certain
49	28	First	Right-hand side	Right-hand side	TRUE	Uncertain	Right-hand side	TRUE	Certain
50	28	First	Left-hand side	Left-hand side	TRUE	Certain	Right-hand side	FALSE	Uncertain
51	28	First	Left-hand side	Right-hand side	FALSE	Uncertain	Left-hand side	TRUE	Certain
52	28	First	Left-hand side	Right-hand side	FALSE	Uncertain	Left-hand side	TRUE	Uncertain
53	28	First	Left-hand side	Right-hand side	FALSE	Certain	Left-hand side	TRUE	Uncertain
54	28	First	Left-hand side	Right-hand side	FALSE	Uncertain	Left-hand side	TRUE	Certain
55	28	First	Left-hand side	Right-hand side	FALSE	Uncertain	Left-hand side	TRUE	Certain
56	28	First	Right-hand side	Right-hand side	TRUE	Certain	Right-hand side	TRUE	Certain
57	28	First	Left-hand side	Left-hand side	TRUE	Uncertain	Right-hand side	FALSE	Uncertain
58	28	First	Right-hand side	Left-hand side	FALSE	Uncertain	Right-hand side	TRUE	Certain
59	28	First	Right-hand side	Left-hand side	FALSE	Uncertain	Right-hand side	TRUE	Certain
60	28	First	Left-hand side	Right-hand side	FALSE	Uncertain	Right-hand side	FALSE	Uncertain
1	29	First	Left-hand side	Left-hand side	TRUE	Certain	Left-hand side	TRUE	Certain
2	29	First	Left-hand side	Right-hand side	FALSE	Uncertain	Left-hand side	TRUE	Uncertain
3	29	First	Right-hand side	Right-hand side	TRUE	Certain	Right-hand side	TRUE	Certain
4	29	First	Right-hand side	Right-hand side	TRUE	Certain	Right-hand side	TRUE	Certain
5	29	First	Left-hand side	Left-hand side	TRUE	Certain	Right-hand side	FALSE	Uncertain
6	29	First	Left-hand side	Right-hand side	FALSE	Certain	Right-hand side	FALSE	Uncertain
7	29	First	Left-hand side	Left-hand side	TRUE	Certain	Right-hand side	FALSE	Certain
8	29	First	Right-hand side	Right-hand side	TRUE	Certain	Right-hand side	TRUE	Certain
9	29	First	Right-hand side	Right-hand side	TRUE	Uncertain	Left-hand side	FALSE	Certain
10	29	First	Right-hand side	Right-hand side	TRUE	Certain	Left-hand side	FALSE	Uncertain
11	29	First	Right-hand side	Right-hand side	TRUE	Certain	Right-hand side	TRUE	Certain
12	29	First	Right-hand side	Right-hand side	TRUE	Certain	Left-hand side	FALSE	Uncertain
13	29	First	Left-hand side	Left-hand side	TRUE	Certain	Left-hand side	TRUE	Certain
14	29	First	Right-hand side	Right-hand side	TRUE	Certain	Right-hand side	TRUE	Certain
15	29	First	Left-hand side	Left-hand side	TRUE	Certain	Right-hand side	FALSE	Uncertain
16	29	First	Left-hand side	Left-hand side	TRUE	Certain	Left-hand side	TRUE	Certain
17	29	First	Left-hand side	Left-hand side	TRUE	Certain	Left-hand side	TRUE	Uncertain
18	29	First	Right-hand side	Right-hand side	TRUE	Certain	Right-hand side	TRUE	Certain
19	29	First	Left-hand side	Right-hand side	FALSE	Uncertain	Left-hand side	TRUE	NA
20	29	First	Right-hand side	Right-hand side	TRUE	Certain	Right-hand side	TRUE	Certain
21	29	First	Left-hand side	Right-hand side	FALSE	Certain	Right-hand side	FALSE	Uncertain
22	29	First	Left-hand side	Left-hand side	TRUE	Certain	Left-hand side	TRUE	Certain
23	29	First	Right-hand side	Right-hand side	TRUE	Certain	Right-hand side	TRUE	Certain
24	29	First	Left-hand side	Left-hand side	TRUE	Certain	Right-hand side	FALSE	Certain
25	29	First	Left-hand side	Left-hand side	TRUE	Certain	Left-hand side	TRUE	Certain
26	29	First	Right-hand side	Right-hand side	TRUE	Certain	Right-hand side	TRUE	Uncertain
27	29	First	Left-hand side	Left-hand side	TRUE	Certain	Left-hand side	TRUE	Certain
28	29	First	Right-hand side	Right-hand side	TRUE	Certain	Right-hand side	TRUE	Certain
29	29	First	Left-hand side	Left-hand side	TRUE	Certain	Left-hand side	TRUE	Certain
30	29	First	Right-hand side	Right-hand side	TRUE	Certain	Right-hand side	TRUE	Uncertain
31	29	First	Left-hand side	Left-hand side	TRUE	Certain	Left-hand side	TRUE	Uncertain
32	29	First	Right-hand side	Right-hand side	TRUE	Certain	Left-hand side	FALSE	Uncertain
33	29	First	Right-hand side	Right-hand side	TRUE	Certain	Right-hand side	TRUE	Certain
34	29	First	Left-hand side	Left-hand side	TRUE	Certain	Left-hand side	TRUE	Uncertain
35	29	First	Left-hand side	Left-hand side	TRUE	Certain	Left-hand side	TRUE	Uncertain
36	29	First	Right-hand side	Right-hand side	TRUE	Certain	Right-hand side	TRUE	Certain
37	29	First	Left-hand side	Left-hand side	TRUE	Certain	Left-hand side	TRUE	Uncertain
38	29	First	Left-hand side	Left-hand side	TRUE	Certain	Right-hand side	FALSE	Uncertain
39	29	First	Left-hand side	Left-hand side	TRUE	Certain	Right-hand side	FALSE	Certain
40	29	First	Left-hand side	Left-hand side	TRUE	Certain	Left-hand side	TRUE	Certain
41	29	First	Left-hand side	Left-hand side	TRUE	Certain	Left-hand side	TRUE	Uncertain
42	29	First	Right-hand side	Right-hand side	TRUE	Certain	Left-hand side	FALSE	Uncertain
43	29	First	Left-hand side	Right-hand side	FALSE	Certain	Right-hand side	FALSE	Uncertain
44	29	First	Left-hand side	Left-hand side	TRUE	Uncertain	Left-hand side	TRUE	Uncertain
45	29	First	Left-hand side	Left-hand side	TRUE	Certain	Left-hand side	TRUE	Uncertain
46	29	First	Right-hand side	Left-hand side	FALSE	Certain	Right-hand side	TRUE	NA
47	29	First	Right-hand side	Right-hand side	TRUE	Certain	Right-hand side	TRUE	Certain
48	29	First	Right-hand side	Left-hand side	FALSE	Certain	Left-hand side	FALSE	NA
49	29	First	Right-hand side	Right-hand side	TRUE	Certain	Right-hand side	TRUE	Uncertain
50	29	First	Right-hand side	Right-hand side	TRUE	Certain	Left-hand side	FALSE	Certain
51	29	First	Right-hand side	Right-hand side	TRUE	Certain	Right-hand side	TRUE	Certain
52	29	First	Right-hand side	Left-hand side	FALSE	Certain	Left-hand side	FALSE	Uncertain
53	29	First	Right-hand side	Right-hand side	TRUE	Certain	Right-hand side	TRUE	Certain
54	29	First	Left-hand side	Left-hand side	TRUE	Certain	Left-hand side	TRUE	NA
55	29	First	Right-hand side	Right-hand side	TRUE	Certain	Right-hand side	TRUE	Certain
56	29	First	Right-hand side	Left-hand side	FALSE	Certain	Right-hand side	TRUE	Certain
57	29	First	Left-hand side	Left-hand side	TRUE	Uncertain	Right-hand side	FALSE	Uncertain
58	29	First	Right-hand side	Left-hand side	FALSE	Certain	Right-hand side	TRUE	Certain
59	29	First	Right-hand side	Right-hand side	TRUE	Certain	Right-hand side	TRUE	Uncertain
60	29	First	Left-hand side	Left-hand side	TRUE	Certain	Left-hand side	TRUE	Certain
1	30	First	Left-hand side	Left-hand side	TRUE	NA	Left-hand side	TRUE	Certain
2	30	First	Right-hand side	Right-hand side	TRUE	Certain	Left-hand side	FALSE	Certain
3	30	First	Left-hand side	Left-hand side	TRUE	Certain	Left-hand side	TRUE	Certain
4	30	First	Right-hand side	Right-hand side	TRUE	Certain	Left-hand side	FALSE	Certain
5	30	First	Left-hand side	Right-hand side	FALSE	Certain	Left-hand side	TRUE	Certain
6	30	First	Left-hand side	Left-hand side	TRUE	Uncertain	Right-hand side	FALSE	Certain
7	30	First	Left-hand side	Right-hand side	FALSE	Uncertain	Left-hand side	TRUE	Certain
8	30	First	Left-hand side	Right-hand side	FALSE	Certain	Left-hand side	TRUE	Certain
9	30	First	Left-hand side	Left-hand side	TRUE	Certain	Right-hand side	FALSE	Uncertain
10	30	First	Right-hand side	Right-hand side	TRUE	Certain	Right-hand side	TRUE	Certain
11	30	First	Left-hand side	Left-hand side	TRUE	Certain	Left-hand side	TRUE	Certain
12	30	First	Right-hand side	Right-hand side	TRUE	Certain	Right-hand side	TRUE	Certain
13	30	First	Right-hand side	Left-hand side	FALSE	Uncertain	Left-hand side	FALSE	Uncertain
14	30	First	Right-hand side	Right-hand side	TRUE	Certain	Right-hand side	TRUE	Certain
15	30	First	Right-hand side	Right-hand side	TRUE	Certain	Right-hand side	TRUE	Certain
16	30	First	Right-hand side	Right-hand side	TRUE	Certain	Right-hand side	TRUE	Certain
17	30	First	Left-hand side	Left-hand side	TRUE	Uncertain	Left-hand side	TRUE	Certain
18	30	First	Right-hand side	Right-hand side	TRUE	Certain	Right-hand side	TRUE	Certain
19	30	First	Left-hand side	Left-hand side	TRUE	Certain	Left-hand side	TRUE	Certain
20	30	First	Left-hand side	Left-hand side	TRUE	Certain	Left-hand side	TRUE	Uncertain
21	30	First	Left-hand side	Left-hand side	TRUE	Certain	Left-hand side	TRUE	Uncertain
22	30	First	Right-hand side	Right-hand side	TRUE	Certain	Right-hand side	TRUE	Uncertain
23	30	First	Right-hand side	Right-hand side	TRUE	Certain	Right-hand side	TRUE	Certain
24	30	First	Right-hand side	Right-hand side	TRUE	Uncertain	Right-hand side	TRUE	Certain
25	30	First	Left-hand side	Left-hand side	TRUE	Certain	Left-hand side	TRUE	Uncertain
26	30	First	Left-hand side	Left-hand side	TRUE	Uncertain	Right-hand side	FALSE	Uncertain
27	30	First	Left-hand side	Left-hand side	TRUE	Certain	Left-hand side	TRUE	Certain
28	30	First	Right-hand side	Right-hand side	TRUE	Certain	Right-hand side	TRUE	Uncertain
29	30	First	Right-hand side	Right-hand side	TRUE	Certain	Right-hand side	TRUE	Certain
30	30	First	Left-hand side	Left-hand side	TRUE	Uncertain	Left-hand side	TRUE	Uncertain
31	30	First	Left-hand side	Left-hand side	TRUE	Certain	Left-hand side	TRUE	Uncertain
32	30	First	Right-hand side	Right-hand side	TRUE	Certain	Right-hand side	TRUE	Certain
33	30	First	Right-hand side	Right-hand side	TRUE	Uncertain	Left-hand side	FALSE	Uncertain
34	30	First	Right-hand side	Right-hand side	TRUE	Certain	Right-hand side	TRUE	Certain
35	30	First	Right-hand side	Right-hand side	TRUE	Certain	Right-hand side	TRUE	Certain
36	30	First	Right-hand side	Right-hand side	TRUE	Certain	Right-hand side	TRUE	Certain
37	30	First	Right-hand side	Right-hand side	TRUE	Certain	Right-hand side	TRUE	Uncertain
38	30	First	Right-hand side	Right-hand side	TRUE	Uncertain	Left-hand side	FALSE	Uncertain
39	30	First	Right-hand side	Left-hand side	FALSE	Uncertain	Left-hand side	FALSE	Uncertain
40	30	First	Right-hand side	Right-hand side	TRUE	Certain	Left-hand side	FALSE	Certain
41	30	First	Right-hand side	Right-hand side	TRUE	Uncertain	Left-hand side	FALSE	Uncertain
42	30	First	Right-hand side	Right-hand side	TRUE	Certain	Left-hand side	FALSE	Certain
43	30	First	Right-hand side	Right-hand side	TRUE	Certain	Right-hand side	TRUE	Certain
44	30	First	Right-hand side	Left-hand side	FALSE	Uncertain	Right-hand side	TRUE	Certain
45	30	First	Left-hand side	Left-hand side	TRUE	Certain	Left-hand side	TRUE	Certain
46	30	First	Right-hand side	Right-hand side	TRUE	Certain	Right-hand side	TRUE	Uncertain
47	30	First	Left-hand side	Left-hand side	TRUE	Certain	Right-hand side	FALSE	Uncertain
48	30	First	Left-hand side	Left-hand side	TRUE	Certain	Left-hand side	TRUE	Uncertain
49	30	First	Right-hand side	Right-hand side	TRUE	Certain	Left-hand side	FALSE	Uncertain
50	30	First	Right-hand side	Right-hand side	TRUE	Certain	Right-hand side	TRUE	Certain
51	30	First	Right-hand side	Right-hand side	TRUE	Certain	Left-hand side	FALSE	Uncertain
52	30	First	Right-hand side	Right-hand side	TRUE	Uncertain	Left-hand side	FALSE	Uncertain
53	30	First	Right-hand side	Left-hand side	FALSE	Uncertain	Right-hand side	TRUE	Uncertain
54	30	First	Right-hand side	Right-hand side	TRUE	Uncertain	Right-hand side	TRUE	Uncertain
55	30	First	Right-hand side	Right-hand side	TRUE	Certain	Right-hand side	TRUE	Certain
56	30	First	Right-hand side	Right-hand side	TRUE	Certain	Right-hand side	TRUE	Uncertain
57	30	First	Right-hand side	Left-hand side	FALSE	Certain	Right-hand side	TRUE	Uncertain
58	30	First	Left-hand side	Left-hand side	TRUE	Certain	Right-hand side	FALSE	Certain
59	30	First	Right-hand side	Right-hand side	TRUE	Certain	Right-hand side	TRUE	Certain
60	30	First	Left-hand side	Left-hand side	TRUE	Certain	Left-hand side	TRUE	Uncertain
1	31	First	Left-hand side	Left-hand side	TRUE	Uncertain	Left-hand side	TRUE	Certain
2	31	First	Right-hand side	Right-hand side	TRUE	Certain	Right-hand side	TRUE	Certain
3	31	First	Right-hand side	Left-hand side	FALSE	Certain	Right-hand side	TRUE	Uncertain
4	31	First	Left-hand side	Right-hand side	FALSE	Certain	Left-hand side	TRUE	Uncertain
5	31	First	Right-hand side	Right-hand side	TRUE	Certain	Right-hand side	TRUE	Certain
6	31	First	Left-hand side	Left-hand side	TRUE	Certain	Right-hand side	FALSE	Certain
7	31	First	Right-hand side	Right-hand side	TRUE	Certain	Right-hand side	TRUE	Certain
8	31	First	Right-hand side	Right-hand side	TRUE	Certain	Right-hand side	TRUE	Certain
9	31	First	Left-hand side	Right-hand side	FALSE	Certain	Left-hand side	TRUE	Certain
10	31	First	Left-hand side	Left-hand side	TRUE	Certain	Left-hand side	TRUE	Certain
11	31	First	Right-hand side	Left-hand side	FALSE	Certain	Right-hand side	TRUE	Certain
12	31	First	Left-hand side	Left-hand side	TRUE	Certain	Left-hand side	TRUE	Certain
13	31	First	Left-hand side	Left-hand side	TRUE	Certain	Left-hand side	TRUE	Certain
14	31	First	Right-hand side	Right-hand side	TRUE	Certain	Right-hand side	TRUE	Certain
15	31	First	Right-hand side	Right-hand side	TRUE	Certain	Right-hand side	TRUE	Certain
16	31	First	Right-hand side	Right-hand side	TRUE	Uncertain	Right-hand side	TRUE	Certain
17	31	First	Left-hand side	Right-hand side	FALSE	Certain	Right-hand side	FALSE	Certain
18	31	First	Left-hand side	Left-hand side	TRUE	Certain	Right-hand side	FALSE	Uncertain
19	31	First	Right-hand side	Right-hand side	TRUE	Certain	Right-hand side	TRUE	Certain
20	31	First	Right-hand side	Right-hand side	TRUE	Certain	Right-hand side	TRUE	Certain
21	31	First	Left-hand side	Left-hand side	TRUE	Uncertain	Left-hand side	TRUE	Certain
22	31	First	Right-hand side	Left-hand side	FALSE	Certain	Right-hand side	TRUE	Certain
23	31	First	Left-hand side	Left-hand side	TRUE	Certain	Right-hand side	FALSE	NA
24	31	First	Right-hand side	Right-hand side	TRUE	Certain	Left-hand side	FALSE	Certain
25	31	First	Left-hand side	Left-hand side	TRUE	Certain	Right-hand side	FALSE	Uncertain
26	31	First	Left-hand side	Left-hand side	TRUE	Certain	Left-hand side	TRUE	Certain
27	31	First	Right-hand side	Right-hand side	TRUE	Certain	Right-hand side	TRUE	Certain
28	31	First	Right-hand side	Right-hand side	TRUE	Certain	Right-hand side	TRUE	Certain
29	31	First	Right-hand side	Right-hand side	TRUE	Certain	Right-hand side	TRUE	Certain
30	31	First	Left-hand side	Left-hand side	TRUE	Certain	Left-hand side	TRUE	Uncertain
31	31	First	Left-hand side	Left-hand side	TRUE	Certain	Left-hand side	TRUE	Certain
32	31	First	Left-hand side	Left-hand side	TRUE	Certain	Left-hand side	TRUE	Certain
33	31	First	Left-hand side	Right-hand side	FALSE	Certain	Right-hand side	FALSE	NA
34	31	First	Right-hand side	Right-hand side	TRUE	Certain	Right-hand side	TRUE	Certain
35	31	First	Right-hand side	Right-hand side	TRUE	Certain	Left-hand side	FALSE	Certain
36	31	First	Left-hand side	Left-hand side	TRUE	Certain	Left-hand side	TRUE	Uncertain
37	31	First	Right-hand side	Right-hand side	TRUE	Certain	Right-hand side	TRUE	Certain
38	31	First	Left-hand side	Left-hand side	TRUE	Certain	Right-hand side	FALSE	Certain
39	31	First	Left-hand side	Left-hand side	TRUE	Uncertain	Right-hand side	FALSE	Uncertain
40	31	First	Right-hand side	Right-hand side	TRUE	Certain	Right-hand side	TRUE	Certain
41	31	First	Left-hand side	Right-hand side	FALSE	Certain	Right-hand side	FALSE	Uncertain
42	31	First	Left-hand side	Right-hand side	FALSE	Certain	Left-hand side	TRUE	Certain
43	31	First	Right-hand side	Right-hand side	TRUE	Certain	Right-hand side	TRUE	Certain
44	31	First	Right-hand side	Right-hand side	TRUE	Certain	Right-hand side	TRUE	Certain
45	31	First	Left-hand side	Right-hand side	FALSE	Certain	Right-hand side	FALSE	Uncertain
46	31	First	Right-hand side	Right-hand side	TRUE	Certain	Right-hand side	TRUE	Certain
47	31	First	Right-hand side	Right-hand side	TRUE	Certain	Right-hand side	TRUE	Certain
48	31	First	Left-hand side	Left-hand side	TRUE	Uncertain	Left-hand side	TRUE	Certain
49	31	First	Right-hand side	Right-hand side	TRUE	Certain	Right-hand side	TRUE	Certain
50	31	First	Left-hand side	Left-hand side	TRUE	Certain	Left-hand side	TRUE	Certain
51	31	First	Left-hand side	Left-hand side	TRUE	Certain	Left-hand side	TRUE	Certain
52	31	First	Left-hand side	Right-hand side	FALSE	NA	Left-hand side	TRUE	Certain
53	31	First	Right-hand side	Right-hand side	TRUE	Uncertain	Right-hand side	TRUE	Uncertain
54	31	First	Right-hand side	Right-hand side	TRUE	NA	Right-hand side	TRUE	Certain
55	31	First	Left-hand side	Left-hand side	TRUE	Certain	Right-hand side	FALSE	Uncertain
56	31	First	Right-hand side	Right-hand side	TRUE	Certain	Left-hand side	FALSE	Uncertain
57	31	First	Right-hand side	Left-hand side	FALSE	Uncertain	Right-hand side	TRUE	Certain
58	31	First	Right-hand side	Right-hand side	TRUE	Certain	Left-hand side	FALSE	Uncertain
59	31	First	Right-hand side	Right-hand side	TRUE	Uncertain	Right-hand side	TRUE	Certain
60	31	First	Left-hand side	Left-hand side	TRUE	Certain	Left-hand side	TRUE	Certain
1	32	First	Right-hand side	Right-hand side	TRUE	NA	Right-hand side	TRUE	Certain
2	32	First	Right-hand side	Left-hand side	FALSE	Certain	Right-hand side	TRUE	Certain
3	32	First	Left-hand side	Left-hand side	TRUE	Certain	Left-hand side	TRUE	Certain
4	32	First	Right-hand side	Right-hand side	TRUE	Certain	Right-hand side	TRUE	Uncertain
5	32	First	Right-hand side	Right-hand side	TRUE	Certain	Right-hand side	TRUE	Certain
6	32	First	Left-hand side	Right-hand side	FALSE	Certain	Right-hand side	FALSE	Certain
7	32	First	Left-hand side	Left-hand side	TRUE	Certain	Left-hand side	TRUE	Certain
8	32	First	Right-hand side	Right-hand side	TRUE	Certain	Right-hand side	TRUE	Certain
9	32	First	Left-hand side	Right-hand side	FALSE	Certain	Left-hand side	TRUE	Certain
10	32	First	Left-hand side	Left-hand side	TRUE	Certain	Left-hand side	TRUE	NA
11	32	First	Left-hand side	Right-hand side	FALSE	Certain	Left-hand side	TRUE	Certain
12	32	First	Left-hand side	Left-hand side	TRUE	Certain	Right-hand side	FALSE	Certain
13	32	First	Right-hand side	Right-hand side	TRUE	Certain	Right-hand side	TRUE	Certain
14	32	First	Right-hand side	Right-hand side	TRUE	Certain	Right-hand side	TRUE	Certain
15	32	First	Left-hand side	Right-hand side	FALSE	Certain	Right-hand side	FALSE	Uncertain
16	32	First	Right-hand side	Right-hand side	TRUE	Certain	Right-hand side	TRUE	Certain
17	32	First	Right-hand side	Right-hand side	TRUE	Certain	Right-hand side	TRUE	Certain
18	32	First	Left-hand side	Right-hand side	FALSE	Certain	Left-hand side	TRUE	Certain
19	32	First	Left-hand side	Left-hand side	TRUE	Certain	Left-hand side	TRUE	Certain
20	32	First	Right-hand side	Right-hand side	TRUE	Certain	Right-hand side	TRUE	Certain
21	32	First	Left-hand side	Right-hand side	FALSE	Certain	Left-hand side	TRUE	Certain
22	32	First	Right-hand side	Right-hand side	TRUE	Certain	Right-hand side	TRUE	Certain
23	32	First	Left-hand side	Right-hand side	FALSE	Certain	Right-hand side	FALSE	Certain
24	32	First	Left-hand side	Right-hand side	FALSE	Certain	Left-hand side	TRUE	Certain
25	32	First	Right-hand side	Right-hand side	TRUE	Certain	Right-hand side	TRUE	Uncertain
26	32	First	Left-hand side	Right-hand side	FALSE	Certain	Right-hand side	FALSE	Certain
27	32	First	Left-hand side	Right-hand side	FALSE	Certain	Left-hand side	TRUE	Certain
28	32	First	Right-hand side	Right-hand side	TRUE	Certain	Right-hand side	TRUE	Certain
29	32	First	Right-hand side	Right-hand side	TRUE	Certain	Right-hand side	TRUE	Certain
30	32	First	Left-hand side	Left-hand side	TRUE	Certain	Left-hand side	TRUE	NA
31	32	First	Right-hand side	Right-hand side	TRUE	Certain	Right-hand side	TRUE	Certain
32	32	First	Right-hand side	Right-hand side	TRUE	Certain	Right-hand side	TRUE	Certain
33	32	First	Right-hand side	Right-hand side	TRUE	Certain	Right-hand side	TRUE	Certain
34	32	First	Right-hand side	Right-hand side	TRUE	Certain	Right-hand side	TRUE	Uncertain
35	32	First	Left-hand side	Right-hand side	FALSE	Certain	Left-hand side	TRUE	Certain
36	32	First	Right-hand side	Left-hand side	FALSE	Certain	Right-hand side	TRUE	Certain
37	32	First	Right-hand side	Right-hand side	TRUE	Certain	Right-hand side	TRUE	Certain
38	32	First	Right-hand side	Right-hand side	TRUE	Certain	Right-hand side	TRUE	NA
39	32	First	Right-hand side	Right-hand side	TRUE	Certain	Right-hand side	TRUE	Certain
40	32	First	Right-hand side	Right-hand side	TRUE	Certain	Left-hand side	FALSE	Certain
41	32	First	Left-hand side	Right-hand side	FALSE	Certain	Left-hand side	TRUE	Certain
42	32	First	Left-hand side	Right-hand side	FALSE	Certain	Right-hand side	FALSE	Certain
43	32	First	Left-hand side	Right-hand side	FALSE	Certain	Left-hand side	TRUE	Certain
44	32	First	Right-hand side	Right-hand side	TRUE	Certain	Right-hand side	TRUE	Uncertain
45	32	First	Right-hand side	Right-hand side	TRUE	Certain	Right-hand side	TRUE	Certain
46	32	First	Right-hand side	Right-hand side	TRUE	Certain	Left-hand side	FALSE	Certain
47	32	First	Left-hand side	Left-hand side	TRUE	Certain	Left-hand side	TRUE	Uncertain
48	32	First	Right-hand side	Right-hand side	TRUE	Certain	Right-hand side	TRUE	Certain
49	32	First	Right-hand side	Right-hand side	TRUE	Certain	Left-hand side	FALSE	Certain
50	32	First	Right-hand side	Right-hand side	TRUE	Certain	Right-hand side	TRUE	Certain
51	32	First	Left-hand side	Right-hand side	FALSE	Certain	Left-hand side	TRUE	Certain
52	32	First	Right-hand side	Right-hand side	TRUE	Certain	Right-hand side	TRUE	Certain
53	32	First	Left-hand side	Left-hand side	TRUE	Certain	Left-hand side	TRUE	Certain
54	32	First	Left-hand side	Left-hand side	TRUE	Certain	Left-hand side	TRUE	Certain
55	32	First	Right-hand side	Right-hand side	TRUE	Certain	Right-hand side	TRUE	NA
56	32	First	Right-hand side	Right-hand side	TRUE	Certain	Left-hand side	FALSE	NA
57	32	First	Right-hand side	Right-hand side	TRUE	Certain	Left-hand side	FALSE	NA
58	32	First	Right-hand side	Right-hand side	TRUE	Certain	Right-hand side	TRUE	Certain
59	32	First	Left-hand side	Right-hand side	FALSE	Certain	Left-hand side	TRUE	Certain
60	32	First	Left-hand side	Left-hand side	TRUE	Certain	Right-hand side	FALSE	Certain
1	33	First	Right-hand side	Right-hand side	TRUE	Uncertain	Left-hand side	FALSE	Certain
2	33	First	Right-hand side	Right-hand side	TRUE	Uncertain	Right-hand side	TRUE	Certain
3	33	First	Right-hand side	Right-hand side	TRUE	Uncertain	Left-hand side	FALSE	Uncertain
4	33	First	Left-hand side	Left-hand side	TRUE	Certain	Left-hand side	TRUE	Certain
5	33	First	Left-hand side	Left-hand side	TRUE	Certain	Left-hand side	TRUE	Certain
6	33	First	Left-hand side	Left-hand side	TRUE	Certain	Left-hand side	TRUE	Uncertain
7	33	First	Left-hand side	Left-hand side	TRUE	Uncertain	Left-hand side	TRUE	Certain
8	33	First	Right-hand side	Right-hand side	TRUE	Certain	Right-hand side	TRUE	Certain
9	33	First	Right-hand side	Right-hand side	TRUE	Uncertain	Right-hand side	TRUE	Uncertain
10	33	First	Right-hand side	Left-hand side	FALSE	Certain	Right-hand side	TRUE	Certain
11	33	First	Left-hand side	Left-hand side	TRUE	Certain	Left-hand side	TRUE	Certain
12	33	First	Left-hand side	Left-hand side	TRUE	Certain	Left-hand side	TRUE	Certain
13	33	First	Right-hand side	Right-hand side	TRUE	Uncertain	Left-hand side	FALSE	Certain
14	33	First	Right-hand side	Right-hand side	TRUE	Certain	Right-hand side	TRUE	Certain
15	33	First	Left-hand side	Right-hand side	FALSE	Uncertain	Left-hand side	TRUE	Certain
16	33	First	Left-hand side	Left-hand side	TRUE	Certain	Left-hand side	TRUE	Uncertain
17	33	First	Left-hand side	Left-hand side	TRUE	Certain	Left-hand side	TRUE	Certain
18	33	First	Left-hand side	Left-hand side	TRUE	Certain	Right-hand side	FALSE	Certain
19	33	First	Right-hand side	Right-hand side	TRUE	Uncertain	Left-hand side	FALSE	Uncertain
20	33	First	Right-hand side	Right-hand side	TRUE	Certain	Right-hand side	TRUE	Certain
21	33	First	Left-hand side	Right-hand side	FALSE	Uncertain	Left-hand side	TRUE	Certain
22	33	First	Right-hand side	Left-hand side	FALSE	Uncertain	Right-hand side	TRUE	Certain
23	33	First	Right-hand side	Right-hand side	TRUE	Certain	Left-hand side	FALSE	Uncertain
24	33	First	Right-hand side	Left-hand side	FALSE	Uncertain	Right-hand side	TRUE	Certain
25	33	First	Right-hand side	Right-hand side	TRUE	Certain	Right-hand side	TRUE	Uncertain
26	33	First	Left-hand side	Left-hand side	TRUE	Certain	Left-hand side	TRUE	Certain
27	33	First	Left-hand side	Left-hand side	TRUE	Certain	Left-hand side	TRUE	Certain
28	33	First	Left-hand side	Left-hand side	TRUE	Certain	Left-hand side	TRUE	Uncertain
29	33	First	Left-hand side	Left-hand side	TRUE	Certain	Left-hand side	TRUE	Certain
30	33	First	Right-hand side	Left-hand side	FALSE	Uncertain	Right-hand side	TRUE	Certain
31	33	First	Left-hand side	Left-hand side	TRUE	Uncertain	Left-hand side	TRUE	Certain
32	33	First	Right-hand side	Left-hand side	FALSE	Certain	Right-hand side	TRUE	Certain
33	33	First	Left-hand side	Left-hand side	TRUE	Uncertain	Left-hand side	TRUE	Certain
34	33	First	Left-hand side	Left-hand side	TRUE	Uncertain	Left-hand side	TRUE	Certain
35	33	First	Left-hand side	Right-hand side	FALSE	Certain	Left-hand side	TRUE	Certain
36	33	First	Left-hand side	Left-hand side	TRUE	Uncertain	Right-hand side	FALSE	Certain
37	33	First	Left-hand side	Left-hand side	TRUE	Certain	Left-hand side	TRUE	Certain
38	33	First	Left-hand side	Left-hand side	TRUE	Certain	Left-hand side	TRUE	Certain
39	33	First	Right-hand side	Left-hand side	FALSE	Uncertain	Left-hand side	FALSE	Uncertain
40	33	First	Left-hand side	Left-hand side	TRUE	Certain	Left-hand side	TRUE	Certain
41	33	First	Left-hand side	Left-hand side	TRUE	Certain	Left-hand side	TRUE	Certain
42	33	First	Right-hand side	Right-hand side	TRUE	Certain	Right-hand side	TRUE	Certain
43	33	First	Left-hand side	Right-hand side	FALSE	Uncertain	Left-hand side	TRUE	Certain
44	33	First	Left-hand side	Left-hand side	TRUE	Certain	Left-hand side	TRUE	Certain
45	33	First	Right-hand side	Right-hand side	TRUE	Uncertain	Right-hand side	TRUE	Uncertain
46	33	First	Left-hand side	Left-hand side	TRUE	Certain	Left-hand side	TRUE	Certain
47	33	First	Right-hand side	Right-hand side	TRUE	Certain	Left-hand side	FALSE	Uncertain
48	33	First	Left-hand side	Left-hand side	TRUE	Certain	Right-hand side	FALSE	Certain
49	33	First	Right-hand side	Right-hand side	TRUE	Certain	Left-hand side	FALSE	Uncertain
50	33	First	Right-hand side	Right-hand side	TRUE	Uncertain	Right-hand side	TRUE	Uncertain
51	33	First	Left-hand side	Left-hand side	TRUE	Certain	Left-hand side	TRUE	Certain
52	33	First	Left-hand side	Right-hand side	FALSE	Uncertain	Left-hand side	TRUE	Uncertain
53	33	First	Left-hand side	Right-hand side	FALSE	Uncertain	Left-hand side	TRUE	Certain
54	33	First	Right-hand side	Left-hand side	FALSE	Uncertain	Right-hand side	TRUE	Certain
55	33	First	Right-hand side	Right-hand side	TRUE	Certain	Right-hand side	TRUE	Certain
56	33	First	Right-hand side	Right-hand side	TRUE	Certain	Right-hand side	TRUE	Certain
57	33	First	Right-hand side	Right-hand side	TRUE	Certain	Left-hand side	FALSE	Uncertain
58	33	First	Left-hand side	Left-hand side	TRUE	Certain	Left-hand side	TRUE	Certain
59	33	First	Right-hand side	Right-hand side	TRUE	Certain	Right-hand side	TRUE	Uncertain
60	33	First	Left-hand side	Left-hand side	TRUE	Uncertain	Right-hand side	FALSE	Certain
1	34	First	Left-hand side	Left-hand side	TRUE	Uncertain	Left-hand side	TRUE	Certain
2	34	First	Right-hand side	Right-hand side	TRUE	Uncertain	Left-hand side	FALSE	Uncertain
3	34	First	Right-hand side	Left-hand side	FALSE	Uncertain	Right-hand side	TRUE	Certain
4	34	First	Right-hand side	Left-hand side	FALSE	Certain	Right-hand side	TRUE	Certain
5	34	First	Right-hand side	Right-hand side	TRUE	Uncertain	Right-hand side	TRUE	Certain
6	34	First	Right-hand side	Right-hand side	TRUE	Certain	Right-hand side	TRUE	Uncertain
7	34	First	Right-hand side	Left-hand side	FALSE	Certain	Left-hand side	FALSE	Certain
8	34	First	Left-hand side	Left-hand side	TRUE	Certain	Left-hand side	TRUE	Uncertain
9	34	First	Right-hand side	Right-hand side	TRUE	Certain	Right-hand side	TRUE	Certain
10	34	First	Left-hand side	Right-hand side	FALSE	Certain	Right-hand side	FALSE	Certain
11	34	First	Right-hand side	Left-hand side	FALSE	Certain	Left-hand side	FALSE	Certain
12	34	First	Left-hand side	Left-hand side	TRUE	Certain	Left-hand side	TRUE	Certain
13	34	First	Left-hand side	Right-hand side	FALSE	Certain	Right-hand side	FALSE	Uncertain
14	34	First	Left-hand side	Left-hand side	TRUE	Certain	Left-hand side	TRUE	Certain
15	34	First	Right-hand side	Right-hand side	TRUE	Uncertain	Right-hand side	TRUE	Certain
16	34	First	Left-hand side	Right-hand side	FALSE	Certain	Left-hand side	TRUE	Certain
17	34	First	Right-hand side	Right-hand side	TRUE	Certain	Right-hand side	TRUE	Certain
18	34	First	Right-hand side	Right-hand side	TRUE	Certain	Right-hand side	TRUE	Certain
19	34	First	Left-hand side	Left-hand side	TRUE	Certain	Left-hand side	TRUE	Uncertain
[truncated: 101 more rows]
